# Supplementary material
Source: Copernicus journal article supplement (doi:10.5194/acp-26-5813-2026)
Supplement: Supplementary file 1 [file acp-26-5813-2026-supplement.pdf]

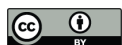

*Supplement of*

## **Sources, concentrations, and seasonal variations of VOC and aerosol particles in downtown Munich in 2023/2024**

**Yanxia Li et al.**

*Correspondence to:* Yanxia Li ([yanxia.li@kit.edu](mailto:yanxia.li@kit.edu)) and Harald Saathoff ([harald.saathoff@kit.edu](mailto:harald.saathoff@kit.edu))

The copyright of individual parts of the supplement might differ from the article licence.

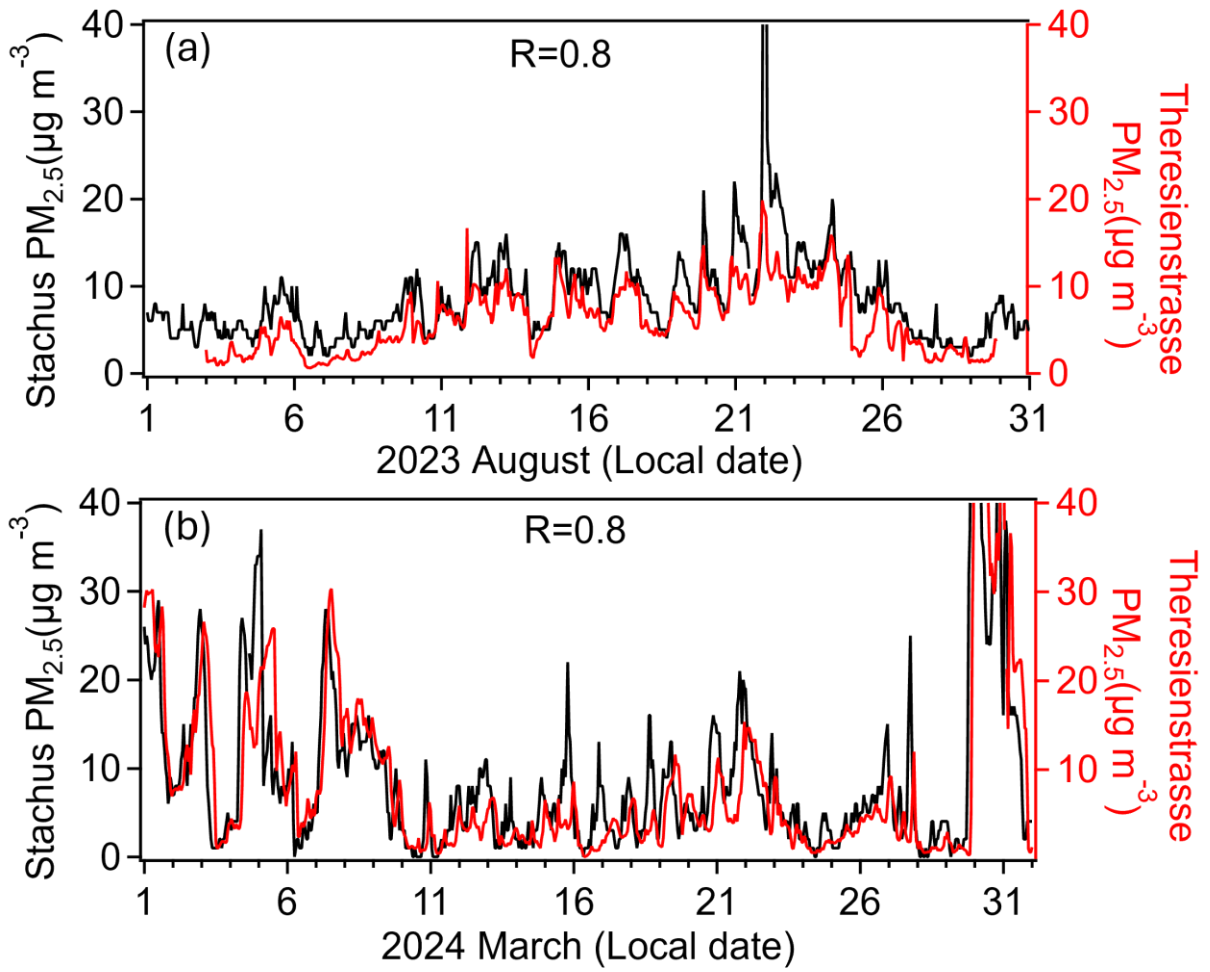

Figure S1: The time series and correlations of PM<sub>2.5</sub> mass concentrations at Landesamt für Umwelt Munich/Stachus station and our measurement container in Theresienstrasse in August 2023 (a) and the time series and correlations of PM<sub>2.5</sub> mass concentrations at Landesamt für Umwelt Munich/Stachus station and our measurement container in Theresienstrasse in March 2024 (b).

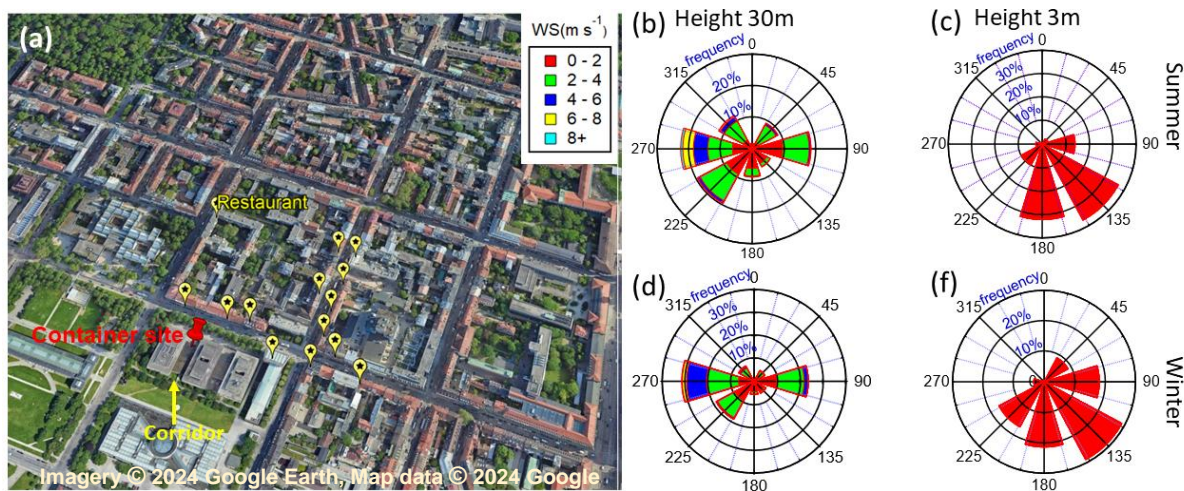

Figure S2. (a) Map of the measurement location at Theresienstrasse 39 in downtown Munich (red pin, LMU) and surrounding restaurants (yellow markers, © is copyright). (b) and (d) Wind direction and wind speed measured by the Institute of Meteorology of LMU at the rooftop (30 meters above ground level) adjacent to the measurement container in summer and winter, respectively. (c) and (f) Wind direction and wind speed measured at 3 meters above the street level on the measurement container in summer and winter, respectively. The tall building redirects the supra-regional wind (30 m) into a very local wind (direction) (3 m). Hence, potential emissions of restaurant west of the measurement location may have a stronger influence on the observations.

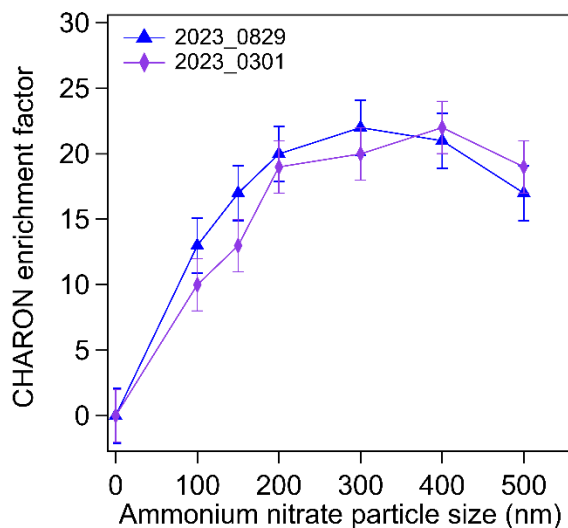

Figure S3 Enrichment factor of CHARON inlet determined by the size-selected ammonium nitrate particles in summer and winter

Instrumental background measurements were performed for all detected ions. For clarity, Fig. S4 presents selected representative ions with relatively high ambient signal intensities, including m/z 59 (acetone-related ions), m/z 93 (toluene-related ions), m/z 121 (trimethylbenzene-related ions), and m/z 137 (monoterpene-related ions). These ions were chosen to illustrate background stability across different chemical classes commonly observed during the campaign.

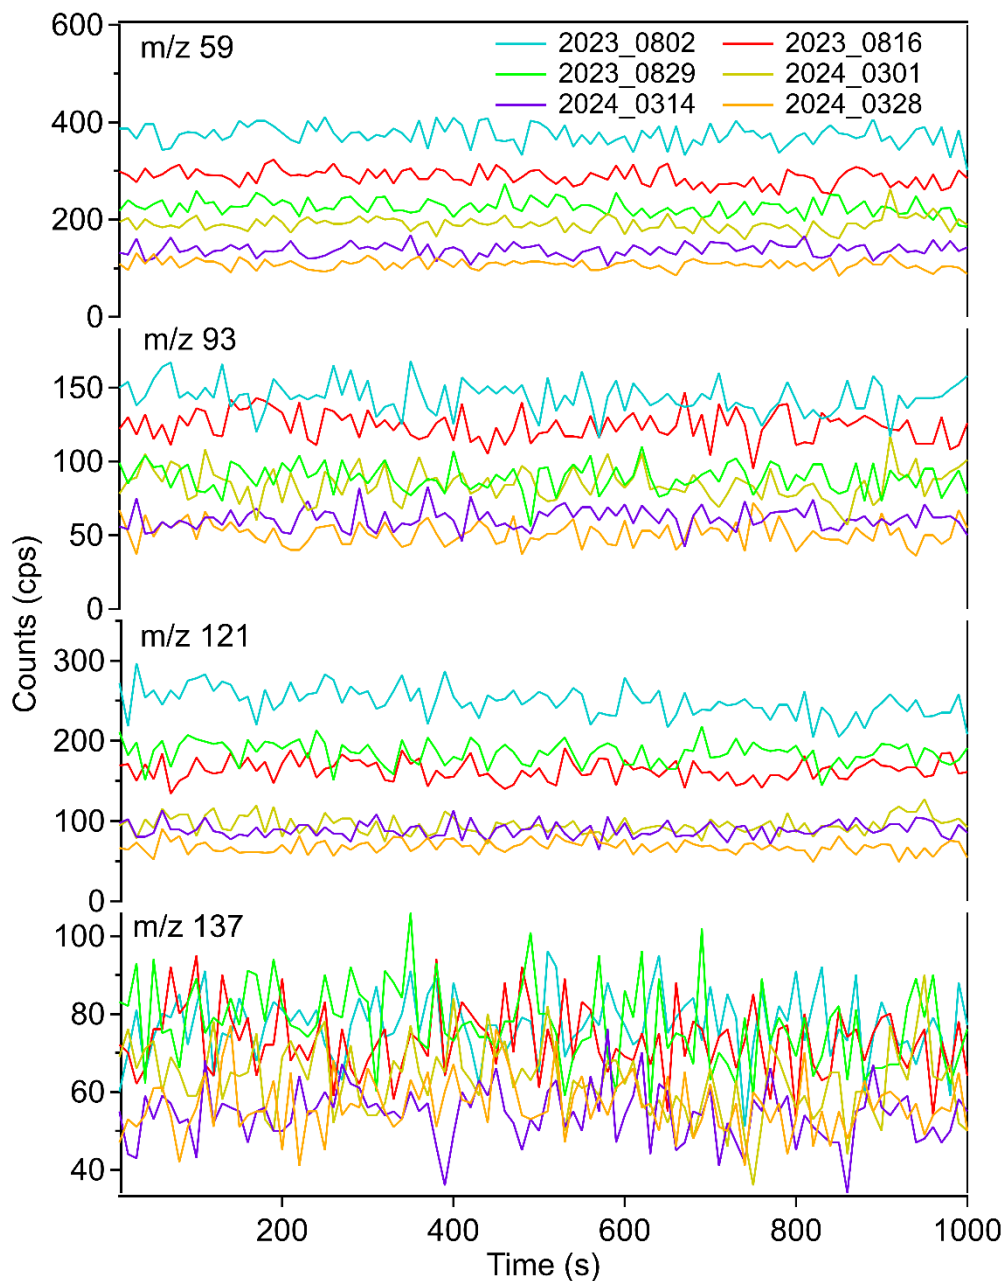

Figure S4. Instrumental background signals measured during weekly nitrogen background tests for selected representative ions. Background measurements were conducted for all detected ions; ions shown here (m/z 59, 93, 121, and 137) were selected as examples due to their relatively high ambient signal intensities and representation of different chemical classes. The small variability demonstrates stable instrumental baseline conditions throughout the campaign.

Calibrations were performed using a gas cylinder (Ionicon Analytik GmbH) containing toluene, 1,2,4-trimethylbenzene, o-xylene,  $\alpha$ -pinene, 1,2,4-trichlorobenzene, 3-hexanone, acetaldehyde, acetone, acetonitrile, benzene, 1,2-(O-)-dichlorobenzene, isoprene, and methanol, each at  $\sim 1$  ppm (10% accuracy), as well as decamethylcyclotrisiloxane and hexamethylcyclotrisiloxane, each at  $\sim 0.5$  ppm (10% accuracy). Two calibrated mass flow controllers (Bronkhorst, Netherlands) with maximum flow rates of 10 L/min and 0.1 L/min ( $\pm 5\%$  accuracy) were used to dilute the gas standard to 1 ppb.

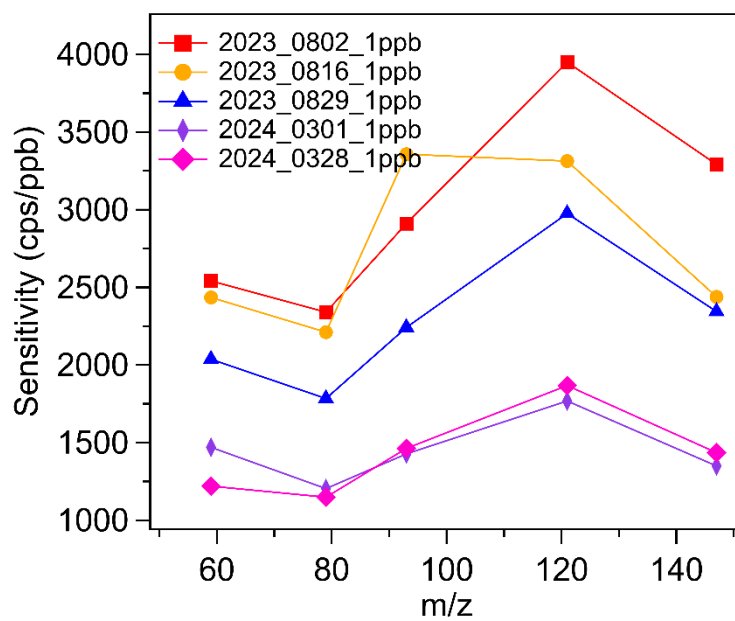

Figure S5 Comparison of sensitivities for calibrated species during summer and winter campaign. The calibrations were conducted before and after the campaigns. The variability is mainly caused by contamination of the instrument inlet throughout the campaign durations.

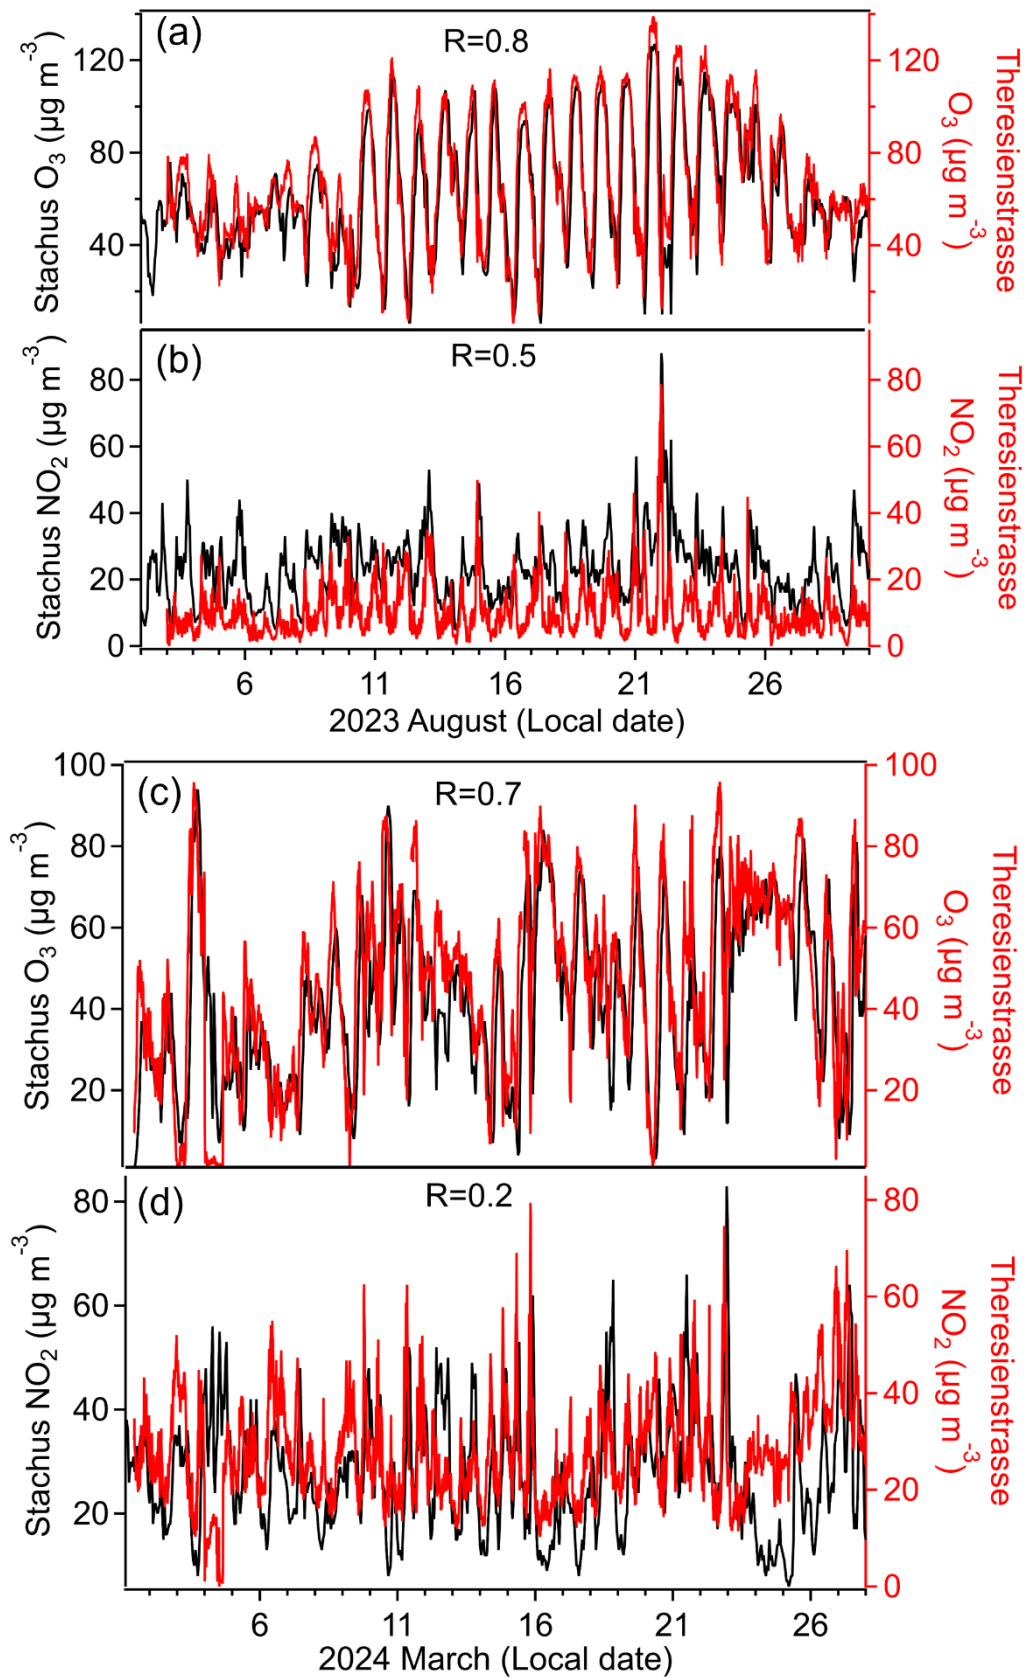

Figure S6. Time series and correlations between LFU and Theresienstrasse stations: (a)  $\text{O}_3$  in summer, (b)  $\text{NO}_2$  in summer, (c)  $\text{O}_3$  in winter, and (d)  $\text{NO}_2$  in winter

Table S1: Main instruments used in the different field campaigns

| Parameter                                                     | Instrument (Manufacturer)                         | Time resolution | Munich 23 | Munich 24 |
|---------------------------------------------------------------|---------------------------------------------------|-----------------|-----------|-----------|
| VOCs/semi-volatile particles                                  | CHARON-PTR-MS<br>(IONICON Analytik GmbH)          | 1 s             | ×         | ×         |
| Particle mass composition<br>(0.07-2.5 $\mu\text{m}$ )        | HR-ToF-AMS<br>(Aerodyne Research)                 | 1 min           | ×         | ×         |
| PM <sub>1</sub> , PM <sub>2.5</sub> and PM <sub>10</sub> mass | FIDAS200 (Palas GmbH)                             | 1 s             | ×         | ×         |
| Black Carbon                                                  | AE33 (Magee Scientific)                           | 1 min           | ×         | ×         |
| Particle number concentration (>7 nm)                         | CPC3022A (TSI Inc.)                               | 1 s             |           | ×         |
| Particle number concentration (>2.5 nm)                       | CPC3756 (TSI Inc.)                                | 1 s             | ×         |           |
| Particle number concentration (>2.5 nm)                       | CPC3776 (TSI Inc.)                                | 1 s             | ×         | ×         |
| Particle size distribution<br>(14 -763.5 nm)                  | SMPS (DMA 3081, TSI Inc.)                         | 6 min           |           | ×         |
| Particle size distribution<br>(7-763.5 nm)                    | U-SMPS (1050, PALAS)                              | 4 min           | ×         |           |
| Formaldehyde (HCHO)                                           | KASCALFiber laser-induced fluorescence<br>(FILIF) | 1 s             | ×         | ×         |
| Meteorological parameters                                     | WS700 (Lufft GmbH)                                | 1 s             | ×         | ×         |
| NO <sub>2</sub>                                               | AS32M (Environment SA.)                           | 1 min           | ×         | ×         |
| O <sub>3</sub>                                                | O341M (Environment SA.)                           | 1 min           | ×         | ×         |
| NH <sub>3</sub>                                               | G2103 (Picarro)                                   | 2 min           | ×         | ×         |

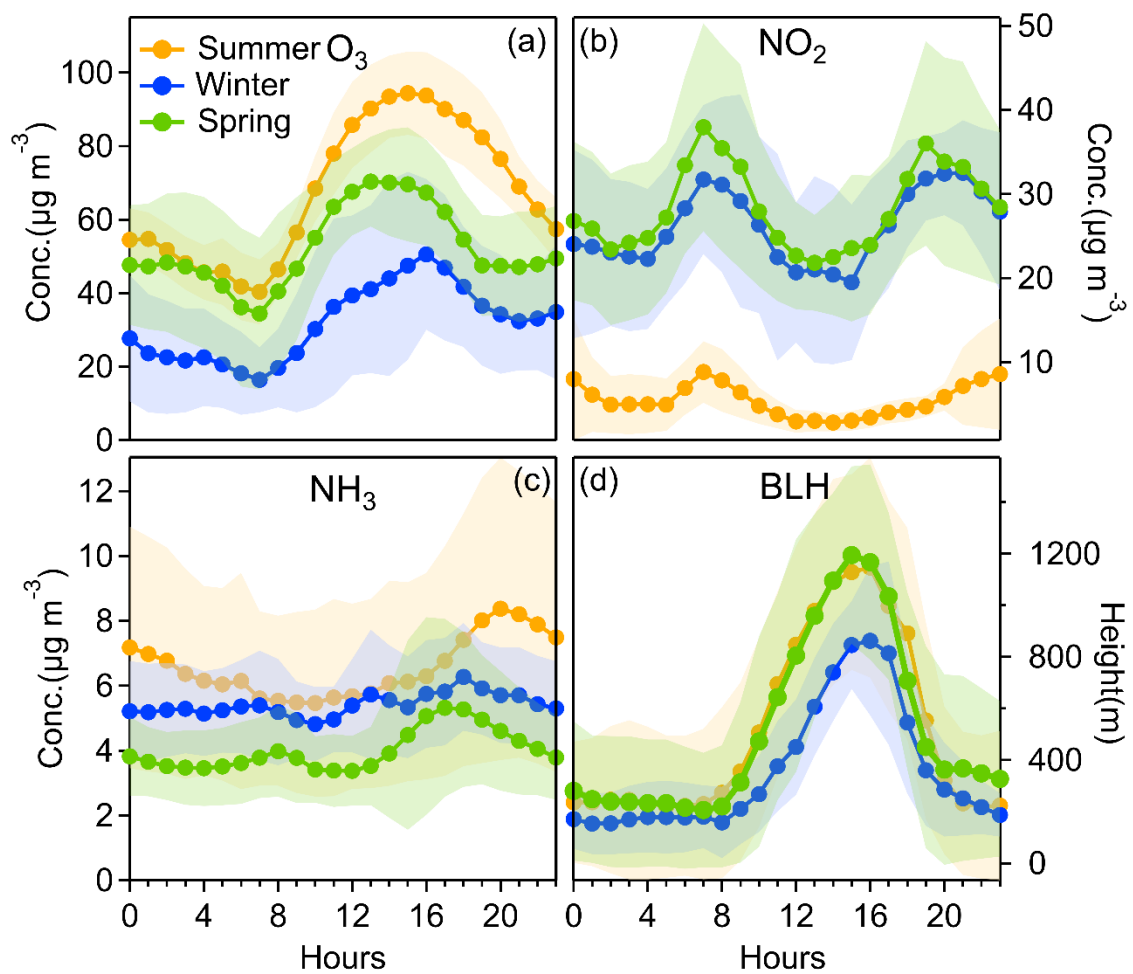

Figure S7. Seasonal mean diurnal cycles of O<sub>3</sub> (a), NO<sub>2</sub> (b), NH<sub>3</sub> (c), and boundary layer height (BLH) (d). Shaded areas represent  $\pm 1$  standard deviation.

Table S2: List of 117 VOC ions from PTR-MS analysis and average (Ave) mixing ratios with standard deviation (Std) as well as measurement detection limit (MDL) included in the summer time gas PMF analysis.

| m/z     | Tentative ion                                                             | Tentative compound                                            | Ave (ppb) | Std (ppb) | MDL (ppb) |
|---------|---------------------------------------------------------------------------|---------------------------------------------------------------|-----------|-----------|-----------|
| 62.027  | C <sub>1</sub> H <sub>4</sub> N <sub>1</sub> O <sub>2</sub> <sup>+</sup>  | nitromethane                                                  | 0.012     | 0.007     | 0.006     |
| 67.051  | C <sub>5</sub> H <sub>7</sub> <sup>+</sup>                                | fragment                                                      | 0.029     | 0.021     | 0.012     |
| 69.030  | C <sub>4</sub> H <sub>5</sub> O <sub>1</sub> <sup>+</sup>                 | furan                                                         | 0.016     | 0.006     | 0.011     |
| 69.067  | C <sub>5</sub> H <sub>9</sub> <sup>+</sup>                                | Isoprene                                                      | 0.138     | 0.075     | 0.056     |
| 71.046  | C <sub>4</sub> H <sub>7</sub> O <sub>1</sub> <sup>+</sup>                 | methyl vinyl ketone + methacrolein                            | 0.090     | 0.056     | 0.014     |
| 71.083  | C <sub>5</sub> H <sub>11</sub> <sup>+</sup>                               | pentenes                                                      | 0.048     | 0.025     | 0.038     |
| 73.025  | C <sub>3</sub> H <sub>5</sub> O <sub>2</sub> <sup>+</sup>                 | methylglyoxal/acrylic acid                                    | 0.046     | 0.017     | 0.018     |
| 73.062  | C <sub>4</sub> H <sub>9</sub> O <sub>1</sub> <sup>+</sup>                 | methyl ethyl ketone/butanals                                  | 0.116     | 0.074     | 0.017     |
| 74.060  | C <sub>3</sub> H <sub>8</sub> N <sub>1</sub> O <sub>1</sub> <sup>+</sup>  | n,n-Dimethylformamide                                         | 0.009     | 0.005     | 0.006     |
| 75.042  | C <sub>3</sub> H <sub>7</sub> O <sub>2</sub> <sup>+</sup>                 | propanonic acid/hydroxyacetone                                | 0.137     | 0.078     | 0.035     |
| 77.022  | C <sub>2</sub> H <sub>5</sub> O <sub>3</sub> <sup>+</sup>                 | glycolic acid                                                 | 0.031     | 0.022     | 0.003     |
| 77.057  | C <sub>3</sub> H <sub>9</sub> O <sub>2</sub> <sup>+</sup>                 | propylene glycol                                              | 0.120     | 0.088     | 0.005     |
| 79.037  | C <sub>2</sub> H <sub>7</sub> O <sub>3</sub> <sup>+</sup>                 | orthoacetic acid                                              | 0.116     | 0.106     | 0.017     |
| 79.052  | C <sub>6</sub> H <sub>7</sub> <sup>+</sup>                                | benzene                                                       | 0.054     | 0.035     | 0.010     |
| 80.053  | C <sub>5</sub> H <sub>6</sub> N <sub>1</sub> <sup>+</sup>                 | Pyridine                                                      | 0.004     | 0.003     | 0.003     |
| 81.067  | C <sub>6</sub> H <sub>9</sub> <sup>+</sup>                                | fragment of monoterpenes                                      | 0.093     | 0.069     | 0.017     |
| 82.070  | C <sub>5</sub> H <sub>8</sub> N <sub>1</sub> <sup>+</sup>                 | 1-methylpyrrole, 4-pentenenitrile                             | 0.007     | 0.005     | 0.001     |
| 83.047  | C <sub>5</sub> H <sub>7</sub> O <sub>1</sub> <sup>+</sup>                 | methylfuran                                                   | 0.026     | 0.017     | 0.008     |
| 83.083  | C <sub>6</sub> H <sub>11</sub> <sup>+</sup>                               | fragments of hexenol/hexanal                                  | 0.092     | 0.073     | 0.042     |
| 85.026  | C <sub>4</sub> H <sub>5</sub> O <sub>2</sub> <sup>+</sup>                 | furanone                                                      | 0.046     | 0.013     | 0.021     |
| 85.063  | C <sub>5</sub> H <sub>9</sub> O <sub>1</sub> <sup>+</sup>                 | cyclopentanone                                                | 0.021     | 0.010     | 0.010     |
| 87.042  | C <sub>4</sub> H <sub>7</sub> O <sub>2</sub> <sup>+</sup>                 | 2,3-butanedione                                               | 0.066     | 0.026     | 0.025     |
| 87.079  | C <sub>5</sub> H <sub>11</sub> O <sub>1</sub> <sup>+</sup>                | 2-pentanone                                                   | 0.017     | 0.009     | 0.006     |
| 89.021  | C <sub>3</sub> H <sub>5</sub> O <sub>3</sub> <sup>+</sup>                 | butyric acid                                                  | 0.024     | 0.005     | 0.010     |
| 89.057  | C <sub>4</sub> H <sub>9</sub> O <sub>2</sub> <sup>+</sup>                 | methyl propanoate                                             | 0.045     | 0.027     | 0.028     |
| 91.036  | C <sub>3</sub> H <sub>7</sub> O <sub>3</sub> <sup>+</sup>                 | Dimethyl ester carbonic acid                                  | 0.014     | 0.006     | 0.018     |
| 91.051  | C <sub>7</sub> H <sub>7</sub> <sup>+</sup>                                | thujone and linalool fragment                                 | 0.040     | 0.038     | 0.012     |
| 93.068  | C <sub>7</sub> H <sub>9</sub> <sup>+</sup>                                | toluene                                                       | 0.190     | 0.162     | 0.017     |
| 95.046  | C <sub>6</sub> H <sub>7</sub> O <sub>1</sub> <sup>+</sup>                 | phenol                                                        | 0.017     | 0.007     | 0.012     |
| 95.083  | C <sub>7</sub> H <sub>11</sub> <sup>+</sup>                               | fragment of monoterpenes                                      | 0.029     | 0.017     | 0.013     |
| 97.026  | C <sub>5</sub> H <sub>5</sub> O <sub>2</sub> <sup>+</sup>                 | furfural                                                      | 0.044     | 0.018     | 0.031     |
| 97.062  | C <sub>6</sub> H <sub>9</sub> O <sub>1</sub> <sup>+</sup>                 | 2-ethylfuran/2,5-dimethylfuran                                | 0.016     | 0.008     | 0.007     |
| 97.099  | C <sub>7</sub> H <sub>13</sub> <sup>+</sup>                               | methylcyclohexene                                             | 0.032     | 0.013     | 0.025     |
| 99.006  | C <sub>4</sub> H <sub>3</sub> O <sub>3</sub> <sup>+</sup>                 | Maleic anhydride                                              | 0.012     | 0.002     | 0.012     |
| 99.042  | C <sub>5</sub> H <sub>7</sub> O <sub>2</sub> <sup>+</sup>                 | furanone                                                      | 0.055     | 0.025     | 0.021     |
| 99.079  | C <sub>6</sub> H <sub>11</sub> O <sub>1</sub> <sup>+</sup>                | cyclohexanone                                                 | 0.017     | 0.008     | 0.011     |
| 100.074 | C <sub>5</sub> H <sub>10</sub> N <sub>1</sub> O <sub>1</sub> <sup>+</sup> | 2-Piperidinone                                                | 0.009     | 0.002     | 0.007     |
| 101.021 | C <sub>4</sub> H <sub>5</sub> O <sub>3</sub> <sup>+</sup>                 | pentanedione                                                  | 0.026     | 0.005     | 0.015     |
| 101.058 | C <sub>5</sub> H <sub>9</sub> O <sub>2</sub> <sup>+</sup>                 | C <sub>5</sub> -hydroxy carbonyl (ISOPOOH conversion product) | 0.077     | 0.037     | 0.020     |
| 103.037 | C <sub>4</sub> H <sub>7</sub> O <sub>3</sub> <sup>+</sup>                 | acetic anhydride                                              | 0.021     | 0.009     | 0.008     |
| 103.074 | C <sub>5</sub> H <sub>11</sub> O <sub>2</sub> <sup>+</sup>                | oxidized molecules of Isoprene                                | 0.009     | 0.004     | 0.012     |
| 105.058 | C <sub>4</sub> H <sub>9</sub> O <sub>3</sub> <sup>+</sup>                 | oxidized molecules of Isoprene                                | 0.009     | 0.006     | 0.005     |
| 105.074 | C <sub>8</sub> H <sub>9</sub> <sup>+</sup>                                | styrene                                                       | 0.010     | 0.009     | 0.011     |
| 105.097 | C <sub>5</sub> H <sub>13</sub> O <sub>2</sub> <sup>+</sup>                | oxidized molecules of Isoprene                                | 0.002     | 0.001     | 0.003     |
| 107.045 | C <sub>7</sub> H <sub>7</sub> O <sub>1</sub> <sup>+</sup>                 | Benzaldehyde                                                  | 0.019     | 0.012     | 0.009     |
| 107.083 | C <sub>8</sub> H <sub>11</sub> <sup>+</sup>                               | C <sub>8</sub> aromatics (xylenes)                            | 0.184     | 0.166     | 0.012     |
| 108.087 | C <sub>7</sub> H <sub>10</sub> N <sub>1</sub> <sup>+</sup>                | 3-ethyl-pyridine                                              | 0.011     | 0.009     | 0.002     |
| 109.099 | C <sub>8</sub> H <sub>13</sub> <sup>+</sup>                               | fragment of sesquiterpenes                                    | 0.030     | 0.023     | 0.016     |
| 111.044 | C <sub>6</sub> H <sub>7</sub> O <sub>2</sub> <sup>+</sup>                 | 1,2-benzenediol; resorcinol                                   | 0.033     | 0.015     | 0.012     |
| 111.079 | C <sub>7</sub> H <sub>11</sub> O <sub>1</sub> <sup>+</sup>                | heptadienal                                                   | 0.010     | 0.005     | 0.006     |
| 111.114 | C <sub>8</sub> H <sub>15</sub> <sup>+</sup>                               | oxidized molecules of monoterpenes                            | 0.020     | 0.008     | 0.019     |
| 113.024 | C <sub>5</sub> H <sub>5</sub> O <sub>3</sub> <sup>+</sup>                 | furoic acid                                                   | 0.024     | 0.006     | 0.015     |
| 113.057 | C <sub>6</sub> H <sub>9</sub> O <sub>2</sub> <sup>+</sup>                 | hexendione                                                    | 0.029     | 0.014     | 0.013     |
| 115.036 | C <sub>5</sub> H <sub>7</sub> O <sub>3</sub> <sup>+</sup>                 | pentanetrione                                                 | 0.019     | 0.005     | 0.011     |
| 115.074 | C <sub>6</sub> H <sub>11</sub> O <sub>2</sub> <sup>+</sup>                | 2,5-hexanedione/ethyl-2-butenate                              | 0.030     | 0.015     | 0.012     |

|         |                                                                           |                                                 |       |       |       |
|---------|---------------------------------------------------------------------------|-------------------------------------------------|-------|-------|-------|
| 117.017 | C <sub>4</sub> H <sub>5</sub> O <sub>4</sub> <sup>+</sup>                 | maleic acid                                     | 0.014 | 0.003 | 0.009 |
| 117.051 | C <sub>5</sub> H <sub>9</sub> O <sub>3</sub> <sup>+</sup>                 | oxidized molecules of Isoprene                  | 0.010 | 0.005 | 0.005 |
| 119.033 | C <sub>4</sub> H <sub>7</sub> O <sub>4</sub> <sup>+</sup>                 | oxidized molecules of Isoprene                  | 0.027 | 0.011 | 0.008 |
| 119.073 | C <sub>5</sub> H <sub>11</sub> O <sub>3</sub> <sup>+</sup>                | oxidized molecules of Isoprene                  | 0.004 | 0.004 | 0.006 |
| 121.059 | C <sub>8</sub> H <sub>9</sub> O <sub>1</sub> <sup>+</sup>                 | acetophenone; 2-phenylacetaldehyde              | 0.012 | 0.006 | 0.019 |
| 121.098 | C <sub>9</sub> H <sub>13</sub> <sup>+</sup>                               | C9 aromatics (trimethylbenzene)                 | 0.068 | 0.065 | 0.012 |
| 123.077 | C <sub>8</sub> H <sub>11</sub> O <sub>1</sub> <sup>+</sup>                | phenethyl alcohol; ethylphenol                  | 0.004 | 0.002 | 0.004 |
| 123.115 | C <sub>9</sub> H <sub>15</sub> <sup>+</sup>                               | fragment of sesquiterpenes                      | 0.025 | 0.035 | 0.009 |
| 125.059 | C <sub>7</sub> H <sub>9</sub> O <sub>2</sub> <sup>+</sup>                 | guaiacol + dihydroxy toluene                    | 0.014 | 0.008 | 0.007 |
| 125.095 | C <sub>8</sub> H <sub>13</sub> O <sub>1</sub> <sup>+</sup>                | oxidized molecules of monoterpenes              | 0.008 | 0.004 | 0.006 |
| 125.131 | C <sub>9</sub> H <sub>17</sub> <sup>+</sup>                               | 3,3,5-trimethylcyclohexene                      | 0.011 | 0.009 | 0.011 |
| 127.077 | C <sub>7</sub> H <sub>11</sub> O <sub>2</sub> <sup>+</sup>                | oxidized molecules of monoterpene (a-terpinene) | 0.015 | 0.008 | 0.010 |
| 127.114 | C <sub>8</sub> H <sub>15</sub> O <sub>1</sub> <sup>+</sup>                | oxidized molecules of monoterpenes              | 0.008 | 0.003 | 0.022 |
| 129.054 | C <sub>6</sub> H <sub>9</sub> O <sub>3</sub> <sup>+</sup>                 | sotolone; 2,5-di-(hydroxymethyl)furan           | 0.011 | 0.004 | 0.008 |
| 129.089 | C <sub>7</sub> H <sub>13</sub> O <sub>2</sub> <sup>+</sup>                | cyclohexanecarboxylic acid                      | 0.012 | 0.005 | 0.007 |
| 129.126 | C <sub>8</sub> H <sub>17</sub> O <sub>1</sub> <sup>+</sup>                | octanal; octanone                               | 0.006 | 0.004 | 0.006 |
| 131.033 | C <sub>5</sub> H <sub>7</sub> O <sub>4</sub> <sup>+</sup>                 | methylene butanedioic acid                      | 0.017 | 0.010 | 0.012 |
| 131.071 | C <sub>6</sub> H <sub>11</sub> O <sub>3</sub> <sup>+</sup>                | ethyl acetoacetate; (e)-3-methoxy-2-butenic     | 0.005 | 0.002 | 0.003 |
| 131.106 | C <sub>7</sub> H <sub>15</sub> O <sub>2</sub> <sup>+</sup>                | ethyl pentanoate; propyl butanoate              | 0.004 | 0.002 | 0.002 |
| 133.049 | C <sub>5</sub> H <sub>9</sub> O <sub>4</sub> <sup>+</sup>                 | oxidized molecules of Isoprene                  | 0.009 | 0.004 | 0.004 |
| 133.098 | C <sub>10</sub> H <sub>13</sub> <sup>+</sup>                              | cymenene                                        | 0.007 | 0.005 | 0.004 |
| 135.112 | C <sub>10</sub> H <sub>15</sub> <sup>+</sup>                              | C10 aromatics/p-cymene                          | 0.026 | 0.020 | 0.006 |
| 137.092 | C <sub>9</sub> H <sub>13</sub> O <sub>1</sub> <sup>+</sup>                | p-cumenol                                       | 0.003 | 0.003 | 0.005 |
| 137.131 | C <sub>10</sub> H <sub>17</sub> <sup>+</sup>                              | monoterpenes                                    | 0.038 | 0.036 | 0.010 |
| 138.133 | C <sub>9</sub> H <sub>16</sub> N <sub>1</sub> <sup>+</sup>                | triallylamine                                   | 0.004 | 0.005 | 0.001 |
| 139.037 | C <sub>7</sub> H <sub>7</sub> O <sub>3</sub> <sup>+</sup>                 | salicylic acid                                  | 0.010 | 0.004 | 0.009 |
| 139.073 | C <sub>8</sub> H <sub>11</sub> O <sub>2</sub> <sup>+</sup>                | oxidation products of ethylbenzene              | 0.008 | 0.004 | 0.008 |
| 139.111 | C <sub>9</sub> H <sub>15</sub> O <sub>1</sub> <sup>+</sup>                | nopinone                                        | 0.022 | 0.016 | 0.006 |
| 141.053 | C <sub>7</sub> H <sub>9</sub> O <sub>3</sub> <sup>+</sup>                 | dicarbonyl epoxide                              | 0.012 | 0.008 | 0.006 |
| 141.090 | C <sub>8</sub> H <sub>13</sub> O <sub>2</sub> <sup>+</sup>                | oxidized molecules of monoterpenes              | 0.009 | 0.005 | 0.007 |
| 141.126 | C <sub>9</sub> H <sub>17</sub> O <sub>1</sub> <sup>+</sup>                | 3,6-nonadienol                                  | 0.010 | 0.013 | 0.009 |
| 143.042 | C <sub>6</sub> H <sub>7</sub> O <sub>4</sub> <sup>+</sup>                 | hydroxy maltol                                  | 0.007 | 0.003 | 0.006 |
| 143.075 | C <sub>7</sub> H <sub>11</sub> O <sub>3</sub> <sup>+</sup>                | oxidized molecules of monoterpene (Terpinolene) | 0.007 | 0.003 | 0.004 |
| 143.106 | C <sub>8</sub> H <sub>15</sub> O <sub>2</sub> <sup>+</sup>                | oxidized molecules of monoterpenes              | 0.008 | 0.003 | 0.007 |
| 143.141 | C <sub>9</sub> H <sub>19</sub> O <sub>1</sub> <sup>+</sup>                | nonanal                                         | 0.010 | 0.009 | 0.010 |
| 145.049 | C <sub>6</sub> H <sub>9</sub> O <sub>4</sub> <sup>+</sup>                 | acetate furanol; dehydrated levoglucosan        | 0.010 | 0.006 | 0.007 |
| 149.098 | C <sub>10</sub> H <sub>13</sub> O <sub>1</sub> <sup>+</sup>               | estragole; anethole; isoestragole               | 0.003 | 0.002 | 0.004 |
| 151.111 | C <sub>10</sub> H <sub>15</sub> O <sub>1</sub> <sup>+</sup>               | oxidized molecules of monoterpenes              | 0.013 | 0.013 | 0.003 |
| 152.115 | C <sub>9</sub> H <sub>14</sub> N <sub>1</sub> O <sub>1</sub> <sup>+</sup> | 3-dimethylaminoanisole; 4-aminophenol           | 0.004 | 0.005 | 0.001 |
| 153.052 | C <sub>8</sub> H <sub>9</sub> O <sub>3</sub> <sup>+</sup>                 | methyl salicylate; vanillin                     | 0.007 | 0.004 | 0.004 |
| 153.089 | C <sub>9</sub> H <sub>13</sub> O <sub>2</sub> <sup>+</sup>                | 4-ethyl guaiacol                                | 0.007 | 0.004 | 0.004 |
| 153.126 | C <sub>10</sub> H <sub>17</sub> O <sub>1</sub> <sup>+</sup>               | oxidized molecules of monoterpenes              | 0.010 | 0.007 | 0.004 |
| 155.071 | C <sub>8</sub> H <sub>11</sub> O <sub>3</sub> <sup>+</sup>                | syringol                                        | 0.006 | 0.004 | 0.005 |
| 155.106 | C <sub>9</sub> H <sub>15</sub> O <sub>2</sub> <sup>+</sup>                | oxidized molecules of monoterpenes              | 0.007 | 0.005 | 0.004 |
| 155.142 | C <sub>10</sub> H <sub>19</sub> O <sub>1</sub> <sup>+</sup>               | oxidized molecules of monoterpenes              | 0.003 | 0.001 | 0.012 |
| 157.049 | C <sub>7</sub> H <sub>9</sub> O <sub>4</sub> <sup>+</sup>                 | 1-(5-methyl-2-furanyl)-2-                       | 0.011 | 0.008 | 0.005 |
| 157.120 | C <sub>9</sub> H <sub>17</sub> O <sub>2</sub> <sup>+</sup>                | oxidized molecules of monoterpene(a-terpinene)  | 0.006 | 0.004 | 0.007 |
| 157.157 | C <sub>10</sub> H <sub>21</sub> O <sub>1</sub> <sup>+</sup>               | decanone; decanal                               | 0.005 | 0.002 | 0.009 |
| 159.067 | C <sub>7</sub> H <sub>11</sub> O <sub>4</sub> <sup>+</sup>                | dimethyl 2-                                     | 0.005 | 0.003 | 0.003 |
| 161.044 | C <sub>6</sub> H <sub>9</sub> O <sub>5</sub> <sup>+</sup>                 | 2-oxoadipic acid                                | 0.005 | 0.002 | 0.003 |
| 163.132 | C <sub>8</sub> H <sub>19</sub> O <sub>3</sub> <sup>+</sup>                | diethyl carbitol                                | 0.006 | 0.002 | 0.010 |
| 165.089 | C <sub>10</sub> H <sub>13</sub> O <sub>2</sub> <sup>+</sup>               | methyl phenylpropionate; β-phenethyl acetate    | 0.003 | 0.002 | 0.003 |
| 167.105 | C <sub>10</sub> H <sub>15</sub> O <sub>2</sub> <sup>+</sup>               | oxidized molecules of monoterpenes              | 0.006 | 0.004 | 0.001 |

|         |                                                             |                                            |       |       |       |
|---------|-------------------------------------------------------------|--------------------------------------------|-------|-------|-------|
| 169.090 | C <sub>9</sub> H <sub>13</sub> O <sub>3</sub> <sup>+</sup>  | 1,2,4-trimethoxybenzene;<br>methylsyringol | 0.005 | 0.003 | 0.001 |
| 169.124 | C <sub>10</sub> H <sub>17</sub> O <sub>2</sub> <sup>+</sup> | oxidized molecules of monoterpenes         | 0.005 | 0.004 | 0.001 |
| 171.068 | C <sub>8</sub> H <sub>11</sub> O <sub>4</sub> <sup>+</sup>  | oxidation products of ethylbenzene         | 0.007 | 0.005 | 0.004 |
| 171.110 | C <sub>9</sub> H <sub>15</sub> O <sub>3</sub> <sup>+</sup>  | oxidized molecules of monoterpenes         | 0.004 | 0.002 | 0.002 |
| 171.142 | C <sub>10</sub> H <sub>19</sub> O <sub>2</sub> <sup>+</sup> | oxidized molecules of monoterpenes         | 0.002 | 0.001 | 0.001 |
| 177.148 | C <sub>9</sub> H <sub>21</sub> O <sub>3</sub> <sup>+</sup>  | 1,3,3-triethoxypropane                     | 0.006 | 0.003 | 0.002 |
| 183.108 | C <sub>10</sub> H <sub>15</sub> O <sub>3</sub> <sup>+</sup> | oxidized molecules of monoterpenes         | 0.003 | 0.002 | 0.001 |
| 185.114 | C <sub>10</sub> H <sub>17</sub> O <sub>3</sub> <sup>+</sup> | oxidized molecules of monoterpenes         | 0.002 | 0.001 | 0.001 |
| 205.190 | C <sub>15</sub> H <sub>25</sub> <sup>+</sup>                | sesquiterpenes                             | 0.002 | 0.002 | 0.001 |

Table S3: List of 97 VOC ions from Charon-PTR-MS and average (Ave) mixing ratios with standard deviation (Std) as well as measurement detection limit (MDL) included in the winter time gas PMF analysis.

| m/z     | Tentative ion                                                             | Tentative compound                                               | Ave (ppb) | Std (ppb) | MDL (ppb) |
|---------|---------------------------------------------------------------------------|------------------------------------------------------------------|-----------|-----------|-----------|
| 57.031  | C <sub>3</sub> H <sub>5</sub> O <sub>1</sub> <sup>+</sup>                 | propionic acid fragment                                          | 0.098     | 0.044     | 0.0447    |
| 60.046  | C <sub>2</sub> H <sub>6</sub> N <sub>1</sub> O <sub>1</sub> <sup>+</sup>  | acetamide; n-methyl-formamide                                    | 0.037     | 0.013     | 0.0095    |
| 62.027  | C <sub>1</sub> H <sub>4</sub> N <sub>1</sub> O <sub>2</sub> <sup>+</sup>  | nitromethane                                                     | 0.021     | 0.009     | 0.0133    |
| 67.051  | C <sub>5</sub> H <sub>7</sub> <sup>+</sup>                                | fragment                                                         | 0.019     | 0.009     | 0.0132    |
| 69.030  | C <sub>4</sub> H <sub>5</sub> O <sub>1</sub> <sup>+</sup>                 | furan                                                            | 0.018     | 0.007     | 0.0117    |
| 69.067  | C <sub>5</sub> H <sub>9</sub> <sup>+</sup>                                | Isoprene                                                         | 0.097     | 0.050     | 0.0718    |
| 71.046  | C <sub>4</sub> H <sub>7</sub> O <sub>1</sub> <sup>+</sup>                 | methyl vinyl ketone + methacrolein                               | 0.037     | 0.017     | 0.0171    |
| 71.083  | C <sub>5</sub> H <sub>11</sub> <sup>+</sup>                               | pentenes                                                         | 0.044     | 0.027     | 0.0410    |
| 73.025  | C <sub>3</sub> H <sub>5</sub> O <sub>2</sub> <sup>+</sup>                 | methylglyoxal/acrylic acid                                       | 0.040     | 0.011     | 0.0196    |
| 73.062  | C <sub>4</sub> H <sub>9</sub> O <sub>1</sub> <sup>+</sup>                 | methyl ethyl ketone/butanals                                     | 0.141     | 0.086     | 0.0201    |
| 74.060  | C <sub>3</sub> H <sub>8</sub> N <sub>1</sub> O <sub>1</sub> <sup>+</sup>  | n,n-Dimethylformamide                                            | 0.009     | 0.004     | 0.0052    |
| 75.042  | C <sub>3</sub> H <sub>7</sub> O <sub>2</sub> <sup>+</sup>                 | propanonic acid/hydroxyacetone                                   | 0.086     | 0.043     | 0.0427    |
| 77.022  | C <sub>2</sub> H <sub>5</sub> O <sub>3</sub> <sup>+</sup>                 | glycolic acid                                                    | 0.016     | 0.008     | 0.0032    |
| 77.057  | C <sub>3</sub> H <sub>9</sub> O <sub>2</sub> <sup>+</sup>                 | propylene glycol                                                 | 0.066     | 0.052     | 0.0059    |
| 79.052  | C <sub>6</sub> H <sub>7</sub> <sup>+</sup>                                | benzene                                                          | 0.133     | 0.056     | 0.0100    |
| 80.053  | C <sub>5</sub> H <sub>6</sub> N <sub>1</sub> <sup>+</sup>                 | Pyridine                                                         | 0.006     | 0.003     | 0.0027    |
| 81.067  | C <sub>6</sub> H <sub>9</sub> <sup>+</sup>                                | fragment of monoterpenes                                         | 0.070     | 0.050     | 0.0229    |
| 83.047  | C <sub>5</sub> H <sub>7</sub> O <sub>1</sub> <sup>+</sup>                 | methylfuran                                                      | 0.015     | 0.007     | 0.0098    |
| 83.083  | C <sub>6</sub> H <sub>11</sub> <sup>+</sup>                               | fragments of hexenol/hexanal                                     | 0.071     | 0.036     | 0.0518    |
| 85.026  | C <sub>4</sub> H <sub>5</sub> O <sub>2</sub> <sup>+</sup>                 | furanone                                                         | 0.044     | 0.010     | 0.0242    |
| 85.063  | C <sub>5</sub> H <sub>9</sub> O <sub>1</sub> <sup>+</sup>                 | cyclopentanone                                                   | 0.015     | 0.006     | 0.0130    |
| 85.098  | C <sub>6</sub> H <sub>13</sub> <sup>+</sup>                               | methylcyclopentane                                               | 0.016     | 0.010     | 0.0194    |
| 87.042  | C <sub>4</sub> H <sub>7</sub> O <sub>2</sub> <sup>+</sup>                 | 2,3-butanedione                                                  | 0.056     | 0.020     | 0.0280    |
| 87.079  | C <sub>5</sub> H <sub>11</sub> O <sub>1</sub> <sup>+</sup>                | 2-pentanone                                                      | 0.017     | 0.007     | 0.0061    |
| 89.021  | C <sub>3</sub> H <sub>5</sub> O <sub>3</sub> <sup>+</sup>                 | butyric acid                                                     | 0.017     | 0.005     | 0.0112    |
| 89.057  | C <sub>4</sub> H <sub>9</sub> O <sub>2</sub> <sup>+</sup>                 | methyl propanoate                                                | 0.041     | 0.023     | 0.0342    |
| 90.017  | C <sub>2</sub> H <sub>4</sub> N <sub>1</sub> O <sub>3</sub> <sup>+</sup>  | oxamic acid                                                      | 0.009     | 0.002     | 0.0064    |
| 91.036  | C <sub>3</sub> H <sub>7</sub> O <sub>3</sub> <sup>+</sup>                 | dimethyl ester carbonic acid                                     | 0.019     | 0.008     | 0.0177    |
| 91.051  | C <sub>7</sub> H <sub>7</sub> <sup>+</sup>                                | thujone and linalool fragment                                    | 0.030     | 0.022     | 0.0152    |
| 91.073  | C <sub>4</sub> H <sub>11</sub> O <sub>2</sub> <sup>+</sup>                | butanediol                                                       | 0.013     | 0.011     | 0.0046    |
| 93.068  | C <sub>7</sub> H <sub>9</sub> <sup>+</sup>                                | toluene                                                          | 0.226     | 0.158     | 0.0187    |
| 95.046  | C <sub>6</sub> H <sub>7</sub> O <sub>1</sub> <sup>+</sup>                 | phenol                                                           | 0.019     | 0.009     | 0.0140    |
| 95.083  | C <sub>7</sub> H <sub>11</sub> <sup>+</sup>                               | fragment of monoterpenes                                         | 0.025     | 0.015     | 0.0165    |
| 97.026  | C <sub>5</sub> H <sub>5</sub> O <sub>2</sub> <sup>+</sup>                 | furfural                                                         | 0.048     | 0.019     | 0.0323    |
| 97.062  | C <sub>6</sub> H <sub>9</sub> O <sub>1</sub> <sup>+</sup>                 | 2-ethylfuran/2,5-dimethylfuran                                   | 0.010     | 0.005     | 0.0089    |
| 97.099  | C <sub>7</sub> H <sub>13</sub> <sup>+</sup>                               | methylcyclohexene                                                | 0.033     | 0.016     | 0.0293    |
| 99.006  | C <sub>4</sub> H <sub>3</sub> O <sub>3</sub> <sup>+</sup>                 | Maleic anhydride                                                 | 0.019     | 0.003     | 0.0120    |
| 99.042  | C <sub>5</sub> H <sub>7</sub> O <sub>2</sub> <sup>+</sup>                 | furanone                                                         | 0.036     | 0.010     | 0.0279    |
| 99.079  | C <sub>6</sub> H <sub>11</sub> O <sub>1</sub> <sup>+</sup>                | cyclohexanone                                                    | 0.012     | 0.006     | 0.0123    |
| 100.074 | C <sub>5</sub> H <sub>10</sub> N <sub>1</sub> O <sub>1</sub> <sup>+</sup> | 2-Piperidinone                                                   | 0.008     | 0.002     | 0.0076    |
| 101.021 | C <sub>4</sub> H <sub>5</sub> O <sub>3</sub> <sup>+</sup>                 | pentanedione                                                     | 0.028     | 0.005     | 0.0175    |
| 101.058 | C <sub>5</sub> H <sub>9</sub> O <sub>2</sub> <sup>+</sup>                 | C <sub>5</sub> -hydroxy carbonyl (ISOPOOH<br>conversion product) | 0.063     | 0.034     | 0.0230    |
| 103.037 | C <sub>4</sub> H <sub>7</sub> O <sub>3</sub> <sup>+</sup>                 | acetic anhydride                                                 | 0.015     | 0.005     | 0.0085    |

|         |                                                             |                                                 |       |       |        |
|---------|-------------------------------------------------------------|-------------------------------------------------|-------|-------|--------|
| 103.074 | C <sub>5</sub> H <sub>11</sub> O <sub>2</sub> <sup>+</sup>  | oxidized molecules of Isoprene                  | 0.009 | 0.004 | 0.0139 |
| 105.074 | C <sub>8</sub> H <sub>9</sub> <sup>+</sup>                  | styrene                                         | 0.027 | 0.018 | 0.0143 |
| 107.045 | C <sub>7</sub> H <sub>7</sub> O <sub>1</sub> <sup>+</sup>   | Benzaldehyde                                    | 0.017 | 0.013 | 0.0095 |
| 107.083 | C <sub>8</sub> H <sub>11</sub> <sup>+</sup>                 | C8 aromatics (xylenes)                          | 0.257 | 0.208 | 0.0158 |
| 108.087 | C <sub>7</sub> H <sub>10</sub> N <sub>1</sub> <sup>+</sup>  | 3-ethyl-pyridine                                | 0.013 | 0.010 | 0.0018 |
| 109.099 | C <sub>8</sub> H <sub>13</sub> <sup>+</sup>                 | fragment of sesquiterpenes                      | 0.024 | 0.013 | 0.0245 |
| 111.044 | C <sub>6</sub> H <sub>7</sub> O <sub>2</sub> <sup>+</sup>   | 1,2-benzenediol; resorcinol                     | 0.030 | 0.012 | 0.0129 |
| 111.079 | C <sub>7</sub> H <sub>11</sub> O <sub>1</sub> <sup>+</sup>  | heptadienal                                     | 0.008 | 0.005 | 0.0070 |
| 111.114 | C <sub>8</sub> H <sub>15</sub> <sup>+</sup>                 | oxidized molecules of monoterpenes              | 0.019 | 0.009 | 0.0209 |
| 113.024 | C <sub>5</sub> H <sub>5</sub> O <sub>3</sub> <sup>+</sup>   | furoic acid                                     | 0.021 | 0.005 | 0.0162 |
| 113.057 | C <sub>6</sub> H <sub>9</sub> O <sub>2</sub> <sup>+</sup>   | hexendione                                      | 0.018 | 0.007 | 0.0156 |
| 115.036 | C <sub>5</sub> H <sub>7</sub> O <sub>3</sub> <sup>+</sup>   | pentanetrione                                   | 0.017 | 0.004 | 0.0129 |
| 115.074 | C <sub>6</sub> H <sub>11</sub> O <sub>2</sub> <sup>+</sup>  | 2,5-hexanedione/ethyl-2-butenolate              | 0.017 | 0.007 | 0.0131 |
| 117.017 | C <sub>4</sub> H <sub>5</sub> O <sub>4</sub> <sup>+</sup>   | maleic acid                                     | 0.016 | 0.009 | 0.0095 |
| 117.051 | C <sub>5</sub> H <sub>9</sub> O <sub>3</sub> <sup>+</sup>   | oxidized molecules of Isoprene                  | 0.009 | 0.004 | 0.0053 |
| 119.033 | C <sub>4</sub> H <sub>7</sub> O <sub>4</sub> <sup>+</sup>   | oxidized molecules of Isoprene                  | 0.018 | 0.010 | 0.0090 |
| 121.059 | C <sub>8</sub> H <sub>9</sub> O <sub>1</sub> <sup>+</sup>   | acetophenone; 2-phenylacetaldehyde              | 0.009 | 0.005 | 0.0192 |
| 121.098 | C <sub>9</sub> H <sub>13</sub> <sup>+</sup>                 | C9 aromatics (trimethylbenzene)                 | 0.113 | 0.079 | 0.0151 |
| 122.101 | C <sub>8</sub> H <sub>12</sub> N <sub>1</sub> <sup>+</sup>  | 2-(1-methylethyl)-pyridine                      | 0.006 | 0.004 | 0.0015 |
| 123.043 | C <sub>7</sub> H <sub>7</sub> O <sub>2</sub> <sup>+</sup>   | benzoic acid; o-hydroxybenzaldehyde             | 0.012 | 0.004 | 0.0012 |
| 123.115 | C <sub>9</sub> H <sub>15</sub> <sup>+</sup>                 | fragment of sesquiterpenes                      | 0.013 | 0.007 | 0.0106 |
| 125.059 | C <sub>7</sub> H <sub>9</sub> O <sub>2</sub> <sup>+</sup>   | guaiacol + dihydroxy toluene                    | 0.011 | 0.005 | 0.0075 |
| 125.095 | C <sub>8</sub> H <sub>13</sub> O <sub>1</sub> <sup>+</sup>  | oxidized molecules of monoterpenes              | 0.005 | 0.002 | 0.0134 |
| 125.131 | C <sub>9</sub> H <sub>17</sub> <sup>+</sup>                 | 3,3,5-trimethylcyclohexene                      | 0.010 | 0.005 | 0.0141 |
| 127.077 | C <sub>7</sub> H <sub>11</sub> O <sub>2</sub> <sup>+</sup>  | oxidized molecules of monoterpene (α-terpinene) | 0.008 | 0.003 | 0.0106 |
| 127.114 | C <sub>8</sub> H <sub>15</sub> O <sub>1</sub> <sup>+</sup>  | oxidized molecules of monoterpenes              | 0.006 | 0.003 | 0.0623 |
| 129.054 | C <sub>6</sub> H <sub>9</sub> O <sub>3</sub> <sup>+</sup>   | sotolone; 2,5-di-(hydroxymethyl)furan           | 0.012 | 0.005 | 0.0073 |
| 129.089 | C <sub>7</sub> H <sub>13</sub> O <sub>2</sub> <sup>+</sup>  | cyclohexanecarboxylic acid                      | 0.008 | 0.004 | 0.0072 |
| 129.126 | C <sub>8</sub> H <sub>17</sub> O <sub>1</sub> <sup>+</sup>  | octanal; octanone                               | 0.004 | 0.001 | 0.0065 |
| 131.033 | C <sub>5</sub> H <sub>7</sub> O <sub>4</sub> <sup>+</sup>   | methylene butanedioic acid                      | 0.010 | 0.004 | 0.0097 |
| 131.071 | C <sub>6</sub> H <sub>11</sub> O <sub>3</sub> <sup>+</sup>  | ethyl acetoacetate; (e)-3-methoxy-2-butenic     | 0.003 | 0.001 | 0.0096 |
| 131.106 | C <sub>7</sub> H <sub>15</sub> O <sub>2</sub> <sup>+</sup>  | ethyl pentanoate; propyl butanoate              | 0.003 | 0.001 | 0.0088 |
| 133.049 | C <sub>5</sub> H <sub>9</sub> O <sub>4</sub> <sup>+</sup>   | oxidized molecules of Isoprene                  | 0.006 | 0.003 | 0.0046 |
| 133.098 | C <sub>10</sub> H <sub>13</sub> <sup>+</sup>                | cymenene                                        | 0.008 | 0.005 | 0.0044 |
| 135.112 | C <sub>10</sub> H <sub>15</sub> <sup>+</sup>                | C10 aromatics/p-cymene                          | 0.035 | 0.019 | 0.0069 |
| 137.131 | C <sub>10</sub> H <sub>17</sub> <sup>+</sup>                | monoterpenes                                    | 0.039 | 0.033 | 0.0131 |
| 138.133 | C <sub>9</sub> H <sub>16</sub> N <sub>1</sub> <sup>+</sup>  | triallylamine                                   | 0.003 | 0.004 | 0.0009 |
| 139.037 | C <sub>7</sub> H <sub>7</sub> O <sub>3</sub> <sup>+</sup>   | salicylic acid                                  | 0.014 | 0.004 | 0.0089 |
| 139.073 | C <sub>8</sub> H <sub>11</sub> O <sub>2</sub> <sup>+</sup>  | oxidation products of ethylbenzene              | 0.006 | 0.002 | 0.0095 |
| 139.111 | C <sub>9</sub> H <sub>15</sub> O <sub>1</sub> <sup>+</sup>  | nopinone                                        | 0.008 | 0.005 | 0.0074 |
| 141.053 | C <sub>7</sub> H <sub>9</sub> O <sub>3</sub> <sup>+</sup>   | dicarbonyl epoxide                              | 0.006 | 0.002 | 0.0061 |
| 141.090 | C <sub>8</sub> H <sub>13</sub> O <sub>2</sub> <sup>+</sup>  | oxidized molecules of monoterpenes              | 0.005 | 0.002 | 0.0088 |
| 141.126 | C <sub>9</sub> H <sub>17</sub> O <sub>1</sub> <sup>+</sup>  | 3,6-nonadienol                                  | 0.004 | 0.002 | 0.0112 |
| 143.042 | C <sub>6</sub> H <sub>7</sub> O <sub>4</sub> <sup>+</sup>   | hydroxy maltol                                  | 0.008 | 0.002 | 0.0068 |
| 143.075 | C <sub>7</sub> H <sub>11</sub> O <sub>3</sub> <sup>+</sup>  | oxidized molecules of monoterpene (Terpinolene) | 0.005 | 0.002 | 0.0051 |
| 143.141 | C <sub>9</sub> H <sub>19</sub> O <sub>1</sub> <sup>+</sup>  | nonanal                                         | 0.007 | 0.004 | 0.0118 |
| 145.049 | C <sub>6</sub> H <sub>9</sub> O <sub>4</sub> <sup>+</sup>   | acetate furanol; dehydrated levoglucosan        | 0.008 | 0.003 | 0.0086 |
| 149.098 | C <sub>10</sub> H <sub>13</sub> O <sub>1</sub> <sup>+</sup> | estragole; anethole; isoestragole               | 0.003 | 0.001 | 0.0040 |
| 151.111 | C <sub>10</sub> H <sub>15</sub> O <sub>1</sub> <sup>+</sup> | oxidized molecules of monoterpenes              | 0.011 | 0.009 | 0.0035 |
| 153.052 | C <sub>8</sub> H <sub>9</sub> O <sub>3</sub> <sup>+</sup>   | methyl salicylate; vanillin                     | 0.004 | 0.001 | 0.0046 |
| 153.089 | C <sub>9</sub> H <sub>13</sub> O <sub>2</sub> <sup>+</sup>  | 4-ethyl guaiacol                                | 0.004 | 0.002 | 0.0048 |
| 153.126 | C <sub>10</sub> H <sub>17</sub> O <sub>1</sub> <sup>+</sup> | oxidized molecules of monoterpenes              | 0.008 | 0.005 | 0.0055 |
| 177.148 | C <sub>9</sub> H <sub>21</sub> O <sub>3</sub> <sup>+</sup>  | 1,3,3-triethoxypropane                          | 0.006 | 0.002 | 0.0007 |
| 205.190 | C <sub>15</sub> H <sub>25</sub> <sup>+</sup>                | sesquiterpenes                                  | 0.003 | 0.002 | 0.0001 |

For PMF analysis, Temporal measurements of variables, such as m/z intensities from mass spectrometers, can be represented as a data matrix  $X_{ij}$ , where columns (j) are variables, and rows (i) are individual time scans. A widely applied approach is the bilinear model, which decomposes  $X_{ij}$  into two matrices, G and F, with a residual matrix E:

$$X_{ij}=GF+E$$

Here, G represents the time series of the p factors (columns), while F captures their corresponding profiles or fingerprints (rows). The residual matrix E accounts for deviations between observed and modeled data. In this framework, factor profiles remain constant over time, and their temporal variability is represented solely by G.

The fpeak approach, represented by  $\phi$ , is employed to globally regulate matrix rotations. When  $\phi$  takes positive values, the process involves elementary or successive rotations that amplify the elements in the columns of matrix G while reducing those in the rows of matrix F, maintaining mass balance throughout. In contrast, negative  $\phi$  values reverse this effect, diminishing G's columns and enhancing F's rows. In PMF analysis using fpeak, initial and final values, along with the step interval, must be specified. The fpeak range should ensure environmentally interpretable solutions with similar mathematical quality (i.e., comparable Q values). The entries in G and F are determined using a least-squares algorithm that minimizes Q, the weighted sum of squared residuals  $e_{ij}$  divided by uncertainties  $\sigma_{ij}$  for all data points:

$$Q = \sum_{i=1}^m \sum_{j=1}^n \left( \frac{e_{ij}}{\sigma_{ij}} \right)^2$$

Here,  $\sigma_{ij}$  typically represents the measurement uncertainty. Data points with  $e_{ij}/\sigma_{ij} \gg 1$  dominate Q and heavily influence the model. While this emphasizes data with high signal-to-noise ratios, such outliers can also result from local events or instrument noise, which the model should exclude. Monitoring total Q across PMF runs is often not meaningful, as its value depends on the data matrix size and the number of factors. Instead, Q is normalized by the degrees of freedom, yielding  $Q_{exp}$ :

$$Q_{exp}=m \cdot n \cdot p \cdot (m+n)$$

In an ideal PMF run,  $Q/Q_{exp}$  approaches  $\sim 1$  if uncertainties account for both measurement and modeling errors. However, modeling uncertainty is often unknown, especially for ambient data. For AMS, typical  $Q/Q_{exp}$  values range from 1 to 5. Environmental conditions and factor overlap must be considered, as increasing the number of factors often reduces  $Q/Q_{exp}$  without significant improvement and may lead to overlapping factors. In such cases, fewer factors should be selected. For PTR gas and Charon data, limited studies report  $Q/Q_{exp}$  values. Factors should be screened based on their correlation with tracers (e.g., toluene for traffic, levoglucosan and vanillin acid for biomass burning). Select runs with high correlations ( $R > 0.8$ ) with tracers for suitable PMF results.

The optimal number of factors was determined by considering both statistical diagnostics and physical interpretability. Increasing the number of factors leads to a reduction in  $Q/Q_{exp}$ , as expected for PMF solutions; however, the improvement becomes marginal beyond five factors (Fig. S8a). Solutions with fewer factors failed to resolve key source-related features, whereas higher-factor solutions resulted in overlapping or non-distinct factors.

Therefore, a five-factor solution was selected as the best compromise between statistical performance and physically interpretable source separation. The robustness of the selected solution is further supported by the distribution of scaled residuals (Fig. S8b), which are centered near zero and show no pronounced systematic structure.

The same evaluation procedure was applied consistently to both PTR-MS VOC and CHARON-PTR-MS datasets.

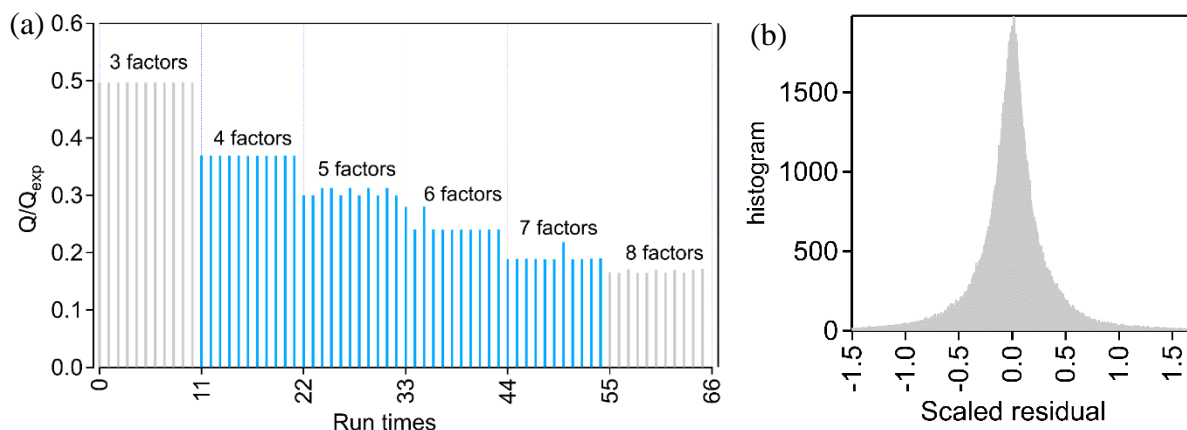

Figure S8 (a)  $Q/Q_{exp}$  values obtained from multiple PMF runs for different factor numbers for summertime VOC measurements. The decrease in  $Q/Q_{exp}$  becomes gradual beyond five factors, indicating diminishing improvement in model performance. (b) Histogram of scaled residuals ( $e_{ij}/\sigma_{ij}$ ) for the selected PMF solution (five factors). The residual distribution is centered near zero and approximately symmetric, indicating an adequate representation of the data and uncertainty structure.

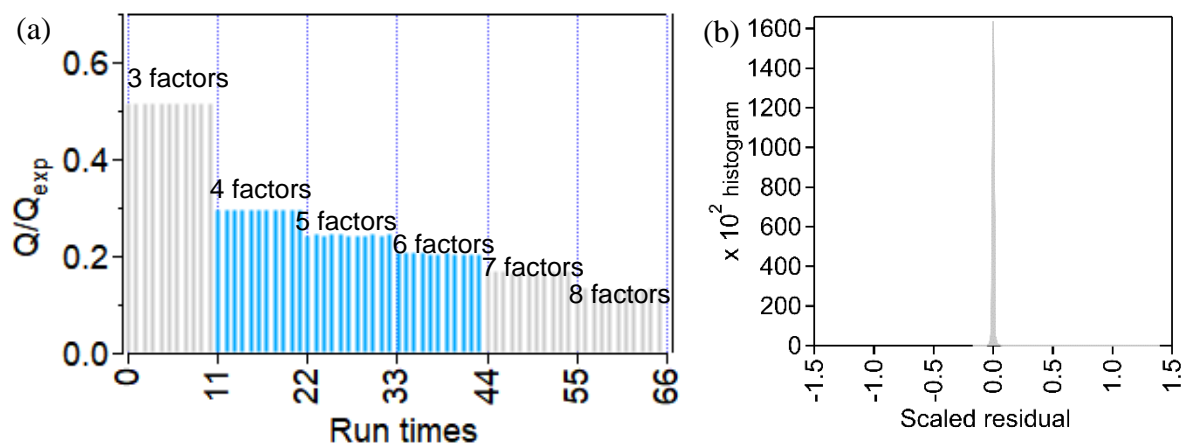

Figure S9. (a)  $Q/Q_{exp}$  values obtained from multiple PMF runs for March VOC measurements. (b) Histogram of scaled residuals ( $e_{ij}/\sigma_{ij}$ ) for the selected PMF solution (five factors), showing a distribution centered near zero and indicating an adequate model fit.

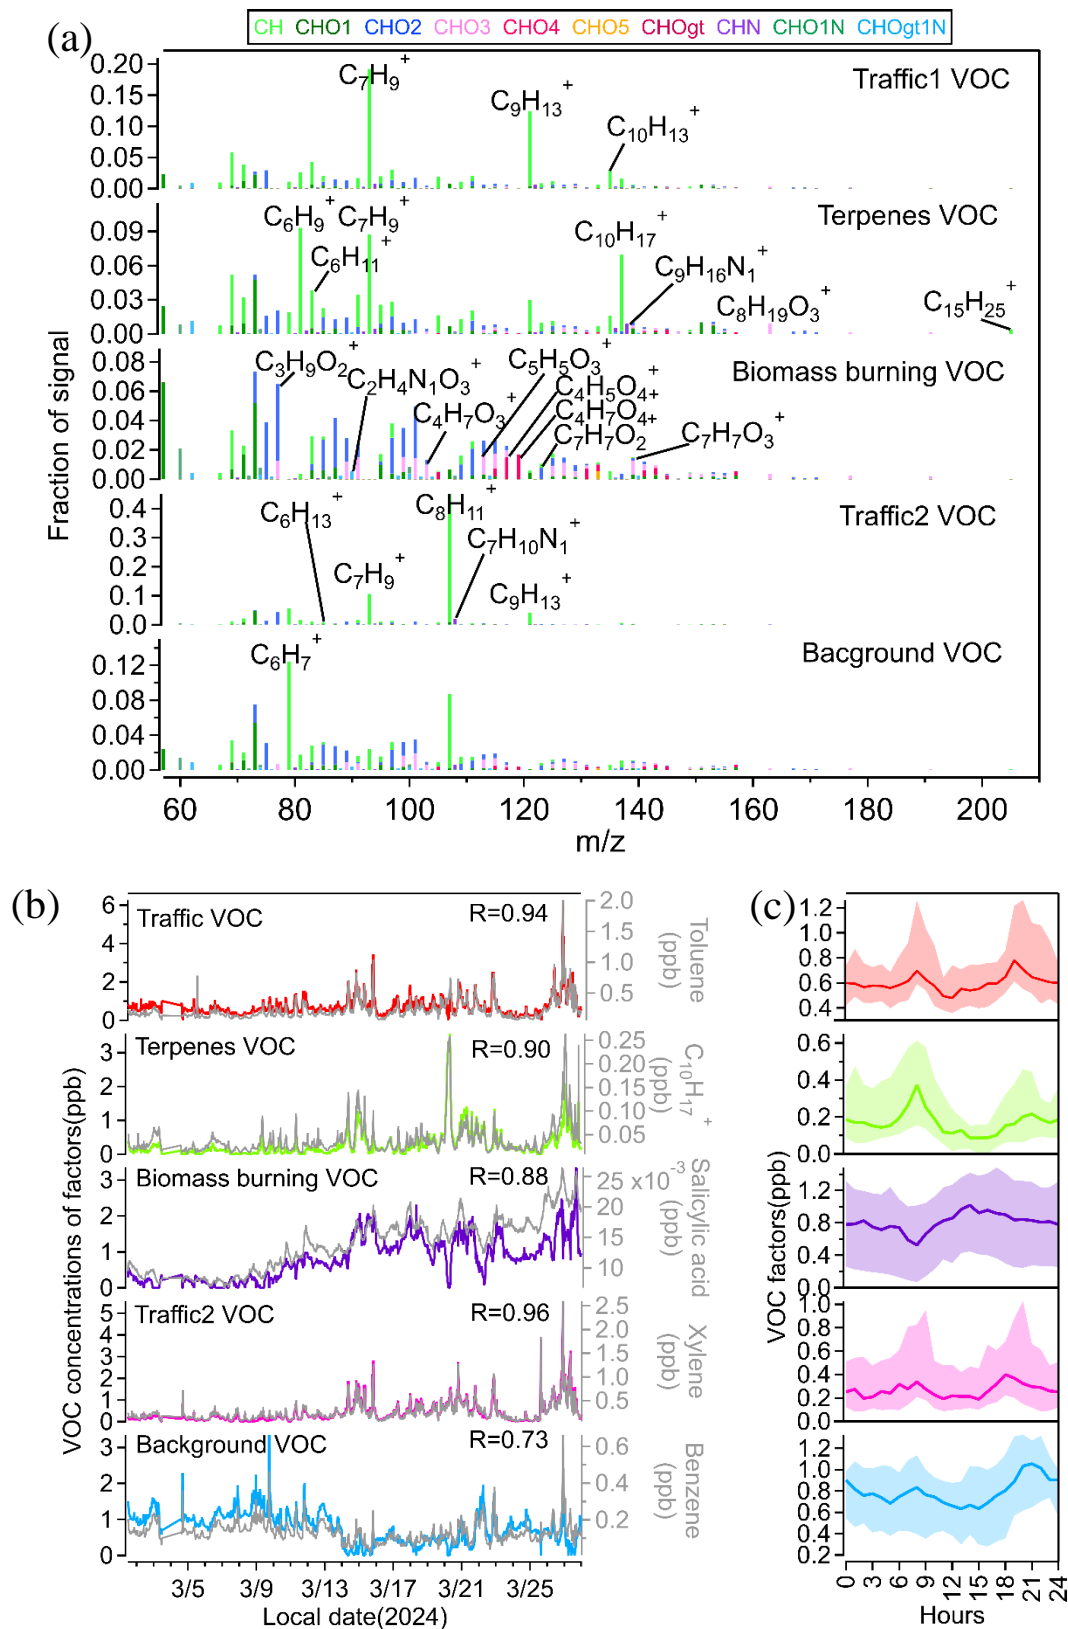

Figure S10 (a) Normalized VOC factor spectra from PMF analysis and characteristic mass /z peaks in winter/spring; (b) Time series of VOC factors including traffic, terpenes, biomass burning, traffic2, and background VOCs; and (c) Median diurnal variations in VOC factors during winter/spring time.

Table S4: Major VOC mass peaks from PTR-MS analysis correlated to the five related gas source factors in summer

| Mass peak (m/z) | Tentative ion                                                             | Tentative compound                         | PMF factor related  | Correlation to PMF factor |
|-----------------|---------------------------------------------------------------------------|--------------------------------------------|---------------------|---------------------------|
| 121.10          | C <sub>9</sub> H <sub>13</sub> <sup>+</sup>                               | C <sub>9</sub> aromatics trimethylbenzene  | Traffic             | 0.95                      |
| 107.09          | C <sub>8</sub> H <sub>11</sub> <sup>+</sup>                               | xylene                                     |                     | 0.93                      |
| 93.07           | C <sub>7</sub> H <sub>9</sub> <sup>+</sup>                                | toluene                                    |                     | 0.92                      |
| 152.11          | C <sub>9</sub> H <sub>14</sub> N <sub>1</sub> O <sub>1</sub> <sup>+</sup> | alcohols or aldehydes with nitrogen groups | Oxidized BVOC       | 0.97                      |
| 167.11          | C <sub>10</sub> H <sub>15</sub> O <sub>2</sub> <sup>+</sup>               | oxidized molecules of monoterpenes         |                     | 0.93                      |
| 149.10          | C <sub>10</sub> H <sub>13</sub> O <sub>1</sub> <sup>+</sup>               | carvone                                    |                     | 0.93                      |
| 151.11          | C <sub>10</sub> H <sub>15</sub> O <sub>1</sub> <sup>+</sup>               | oxidized molecules of monoterpenes         |                     | 0.93                      |
| 153.13          | C <sub>10</sub> H <sub>17</sub> O <sub>1</sub> <sup>+</sup>               | oxidized molecules of monoterpenes         |                     | 0.91                      |
| 139.11          | C <sub>9</sub> H <sub>15</sub> O <sub>1</sub> <sup>+</sup>                | myrcenol                                   |                     | 0.87                      |
| 137.13          | C <sub>10</sub> H <sub>17</sub> <sup>+</sup>                              | monoterpene                                | BVOC                | 0.98                      |
| 138.13          | C <sub>9</sub> H <sub>16</sub> N <sub>1</sub> <sup>+</sup>                | unknown                                    |                     | 0.90                      |
| 81.07           | C <sub>6</sub> H <sub>9</sub> <sup>+</sup>                                | fragment of monoterpenes                   |                     | 0.86                      |
| 82.07           | C <sub>5</sub> H <sub>8</sub> N <sub>1</sub> <sup>+</sup>                 | unknown                                    |                     | 0.81                      |
| 205.20          | C <sub>15</sub> H <sub>25</sub> <sup>+</sup>                              | sesquiterpenes                             |                     | 0.80                      |
| 89.02           | C <sub>3</sub> H <sub>5</sub> O <sub>3</sub> <sup>+</sup>                 | butyric acid                               | Aged VOC            | 0.75                      |
| 101.02          | C <sub>4</sub> H <sub>5</sub> O <sub>3</sub> <sup>+</sup>                 | pentanedione                               |                     | 0.72                      |
|                 | O <sub>3</sub>                                                            |                                            |                     | 0.51                      |
| 131.03          | C <sub>5</sub> H <sub>7</sub> O <sub>4</sub> <sup>+</sup>                 | fragment of oxidized guaiacol molecules    | Biomass burning VOC | 0.92                      |
| 95.01           | C <sub>5</sub> H <sub>3</sub> O <sub>2</sub> <sup>+</sup>                 | fragment of oxidized guaiacol molecules    |                     | 0.91                      |
| 119.03          | C <sub>4</sub> H <sub>7</sub> O <sub>4</sub> <sup>+</sup>                 | fragment of oxidized guaiacol molecules    |                     | 0.90                      |
| 103.04          | C <sub>4</sub> H <sub>7</sub> O <sub>3</sub> <sup>+</sup>                 | fragment of oxidized guaiacol molecules    |                     | 0.86                      |
| 77.06           | C <sub>3</sub> H <sub>9</sub> O <sub>2</sub> <sup>+</sup>                 | 1,3-propanediol                            |                     | 0.85                      |
| 79.04           | C <sub>2</sub> H <sub>7</sub> O <sub>3</sub> <sup>+</sup>                 | orthoacetic acid                           |                     | 0.83                      |

Table S5: Major VOC mass peaks from PTR-MS analysis correlated to the five related gas source factors in winter

| Mass peak (m/z) | Tentative ion                                                            | Tentative compound                        | PMF factor related      | Correlation to PMF factor |
|-----------------|--------------------------------------------------------------------------|-------------------------------------------|-------------------------|---------------------------|
| 121.10          | C <sub>9</sub> H <sub>13</sub> <sup>+</sup>                              | C <sub>9</sub> aromatics trimethylbenzene | Traffic1 VOC            | 0.96                      |
| 93.07           | C <sub>7</sub> H <sub>9</sub> <sup>+</sup>                               | toluene                                   |                         | 0.94                      |
| 133.10          | C <sub>10</sub> H <sub>13</sub> <sup>+</sup>                             | cymenene                                  |                         | 0.86                      |
| 138.13          | C <sub>9</sub> H <sub>16</sub> N <sub>1</sub> <sup>+</sup>               | triallylamine                             | Monoterpenes VOC        | 0.98                      |
| 205.2           | C <sub>15</sub> H <sub>25</sub> <sup>+</sup>                             | sesquiterpenes                            |                         | 0.92                      |
| 137.13          | C <sub>10</sub> H <sub>17</sub> <sup>+</sup>                             | monoterpene                               |                         | 0.90                      |
| 81.07           | C <sub>6</sub> H <sub>9</sub> <sup>+</sup>                               | fragment of monoterpenes                  |                         | 0.89                      |
| 163.13          | C <sub>8</sub> H <sub>19</sub> O <sub>3</sub> <sup>+</sup>               | diethyl carbitol                          |                         | 0.76                      |
| 103.0           | C <sub>4</sub> H <sub>7</sub> O <sub>3</sub> <sup>+</sup>                | acetic anhydride                          | Biomass burning VOC     | 0.89                      |
| 139.04          | C <sub>7</sub> H <sub>7</sub> O <sub>3</sub> <sup>+</sup>                | salicylic acid                            |                         | 0.88                      |
| 77.06           | C <sub>3</sub> H <sub>9</sub> O <sub>2</sub> <sup>+</sup>                | 1,3-propanediol                           |                         | 0.87                      |
| 113.02          | C <sub>5</sub> H <sub>5</sub> O <sub>3</sub> <sup>+</sup>                | furoic acid                               |                         | 0.86                      |
| 90.02           | C <sub>2</sub> H <sub>4</sub> N <sub>1</sub> O <sub>3</sub> <sup>+</sup> | oxamic acid                               |                         | 0.86                      |
| 123.04          | C <sub>7</sub> H <sub>7</sub> O <sub>2</sub> <sup>+</sup>                | benzoic acid                              |                         | 0.86                      |
| 117.02          | C <sub>4</sub> H <sub>5</sub> O <sub>4</sub> <sup>+</sup>                | maleic acid                               |                         | 0.85                      |
| 119.03          | C <sub>4</sub> H <sub>7</sub> O <sub>4</sub> <sup>+</sup>                | butanedioic acid                          | 0.85                    |                           |
| 108.08          | C <sub>7</sub> H <sub>10</sub> N <sub>1</sub> <sup>+</sup>               | 3-ethyl-pyridine                          | Traffic2 VOC            | 0.98                      |
| 107.09          | C <sub>8</sub> H <sub>11</sub> <sup>+</sup>                              | C8 aromatics xylenes                      |                         | 0.96                      |
| 121.10          | C <sub>9</sub> H <sub>13</sub> <sup>+</sup>                              | C <sub>9</sub> aromatics trimethylbenzene |                         | 0.91                      |
| 93.07           | C <sub>7</sub> H <sub>9</sub> <sup>+</sup>                               | toluene                                   |                         | 0.91                      |
| 85.10           | C <sub>6</sub> H <sub>13</sub> <sup>+</sup>                              | methyl cyclopentane                       |                         | 0.90                      |
| 79.0            | C <sub>6</sub> H <sub>7</sub> <sup>+</sup>                               | benzene                                   | Regional background VOC | 0.73                      |

Table S6: List of 153 SVOC ions from Charon-PTR-MS analysis and average (Ave) mixing ratios with standard deviation (Std) as well as measurement detection limit (MDL) included in the summer time semi volatile organic aerosol PMF analysis.

| m/z     | Tentative ion                                                            | Tentative compound                                            | Ave ( $\mu\text{g m}^{-3}$ ) | Std ( $\mu\text{g m}^{-3}$ ) | MDL ( $\mu\text{g m}^{-3}$ ) |
|---------|--------------------------------------------------------------------------|---------------------------------------------------------------|------------------------------|------------------------------|------------------------------|
| 69.031  | C <sub>4</sub> H <sub>5</sub> O <sub>1</sub> <sup>+</sup>                | furan                                                         | 0.0034                       | 0.0026                       | 0.0011                       |
| 71.046  | C <sub>4</sub> H <sub>7</sub> O <sub>1</sub> <sup>+</sup>                | methyl vinyl ketone + methacrolein                            | 0.0055                       | 0.0039                       | 0.0021                       |
| 73.025  | C <sub>3</sub> H <sub>5</sub> O <sub>2</sub> <sup>+</sup>                | methylglyoxal/acrylic acid                                    | 0.0030                       | 0.0025                       | 0.0029                       |
| 75.042  | C <sub>3</sub> H <sub>7</sub> O <sub>2</sub> <sup>+</sup>                | propanoic acid/hydroxyacetone                                 | 0.0080                       | 0.0066                       | 0.0189                       |
| 77.022  | C <sub>2</sub> H <sub>5</sub> O <sub>3</sub> <sup>+</sup>                | glycolic acid                                                 | 0.0006                       | 0.0007                       | 0.0008                       |
| 81.035  | C <sub>5</sub> H <sub>5</sub> O <sub>1</sub> <sup>+</sup>                | 2,4-cyclopentadiene-1-one                                     | 0.0009                       | 0.0008                       | 0.0005                       |
| 83.047  | C <sub>5</sub> H <sub>7</sub> O <sub>1</sub> <sup>+</sup>                | methyl furan                                                  | 0.0062                       | 0.0057                       | 0.0013                       |
| 84.047  | C <sub>4</sub> H <sub>6</sub> N <sub>1</sub> O <sub>1</sub> <sup>+</sup> | 5-methyl-isoxazole                                            | 0.0007                       | 0.0007                       | 0.0002                       |
| 85.026  | C <sub>4</sub> H <sub>5</sub> O <sub>2</sub> <sup>+</sup>                | furanone                                                      | 0.0093                       | 0.0079                       | 0.0040                       |
| 85.063  | C <sub>5</sub> H <sub>9</sub> O <sub>1</sub> <sup>+</sup>                | cyclopentanone                                                | 0.0018                       | 0.0013                       | 0.0012                       |
| 86.030  | C <sub>3</sub> H <sub>4</sub> N <sub>1</sub> O <sub>2</sub> <sup>+</sup> | cyano acetic acid                                             | 0.0004                       | 0.0004                       | 0.0002                       |
| 87.042  | C <sub>4</sub> H <sub>7</sub> O <sub>2</sub> <sup>+</sup>                | 2,3-butanedione                                               | 0.0058                       | 0.0049                       | 0.0043                       |
| 89.021  | C <sub>3</sub> H <sub>5</sub> O <sub>3</sub> <sup>+</sup>                | butyric acid                                                  | 0.0040                       | 0.0041                       | 0.0021                       |
| 89.057  | C <sub>4</sub> H <sub>9</sub> O <sub>2</sub> <sup>+</sup>                | methyl propanoate                                             | 0.0007                       | 0.0005                       | 0.0016                       |
| 90.018  | C <sub>2</sub> H <sub>4</sub> N <sub>1</sub> O <sub>3</sub> <sup>+</sup> | oxamic acid                                                   | 0.0007                       | 0.0007                       | 0.0008                       |
| 91.036  | C <sub>3</sub> H <sub>7</sub> O <sub>3</sub> <sup>+</sup>                | lactic acid                                                   | 0.0008                       | 0.0007                       | 0.0011                       |
| 93.060  | C <sub>3</sub> H <sub>9</sub> O <sub>3</sub> <sup>+</sup>                | ethanol cluster; 1,2,3-propanetriol                           | 0.0022                       | 0.0029                       | 0.0018                       |
| 95.046  | C <sub>6</sub> H <sub>7</sub> O <sub>1</sub> <sup>+</sup>                | phenol                                                        | 0.0046                       | 0.0043                       | 0.0018                       |
| 95.083  | C <sub>7</sub> H <sub>11</sub> <sup>+</sup>                              | fragment of monoterpenes                                      | 0.0014                       | 0.0013                       | 0.0010                       |
| 96.049  | C <sub>5</sub> H <sub>6</sub> N <sub>1</sub> O <sub>1</sub> <sup>+</sup> | 4-pyridinol;                                                  | 0.0006                       | 0.0005                       | 0.0002                       |
| 97.026  | C <sub>5</sub> H <sub>5</sub> O <sub>2</sub> <sup>+</sup>                | furfural                                                      | 0.0047                       | 0.0035                       | 0.0049                       |
| 97.062  | C <sub>6</sub> H <sub>9</sub> O <sub>1</sub> <sup>+</sup>                | 2-ethylfuran/2,5-dimethylfuran                                | 0.0025                       | 0.0020                       | 0.0010                       |
| 99.042  | C <sub>5</sub> H <sub>7</sub> O <sub>2</sub> <sup>+</sup>                | furanone                                                      | 0.0103                       | 0.0077                       | 0.0039                       |
| 99.079  | C <sub>6</sub> H <sub>11</sub> O <sub>1</sub> <sup>+</sup>               | cyclohexanone                                                 | 0.0009                       | 0.0007                       | 0.0011                       |
| 100.040 | C <sub>4</sub> H <sub>6</sub> N <sub>1</sub> O <sub>2</sub> <sup>+</sup> | succinimide                                                   | 0.0009                       | 0.0008                       | 0.0007                       |
| 101.021 | C <sub>4</sub> H <sub>5</sub> O <sub>3</sub> <sup>+</sup>                | pentanedione                                                  | 0.0035                       | 0.0030                       | 0.0031                       |
| 101.058 | C <sub>5</sub> H <sub>9</sub> O <sub>2</sub> <sup>+</sup>                | C <sub>5</sub> -hydroxy carbonyl (ISOPOOH conversion product) | 0.0053                       | 0.0044                       | 0.0031                       |
| 105.018 | C <sub>3</sub> H <sub>5</sub> O <sub>4</sub> <sup>+</sup>                | propanedioic acid                                             | 0.0071                       | 0.0061                       | 0.0019                       |
| 105.056 | C <sub>4</sub> H <sub>9</sub> O <sub>3</sub> <sup>+</sup>                | isobutyric acid                                               | 0.0005                       | 0.0006                       | 0.0004                       |
| 107.038 | C <sub>3</sub> H <sub>7</sub> O <sub>4</sub> <sup>+</sup>                | glyceric acid                                                 | 0.0009                       | 0.0009                       | 0.0004                       |
| 107.083 | C <sub>4</sub> H <sub>11</sub> O <sub>3</sub> <sup>+</sup>               | trimethoxy methane                                            | 0.0028                       | 0.0033                       | 0.0008                       |
| 108.086 | C <sub>7</sub> H <sub>10</sub> N <sub>1</sub> <sup>+</sup>               | 3-ethyl-pyridine; 2,3-dimethyl-pyridine                       | 0.0007                       | 0.0013                       | 0.0001                       |
| 109.059 | C <sub>7</sub> H <sub>9</sub> O <sub>1</sub> <sup>+</sup>                | cresol, anisole                                               | 0.0023                       | 0.0022                       | 0.0027                       |
| 109.099 | C <sub>8</sub> H <sub>13</sub> <sup>+</sup>                              | fragment of sesquiterpenes                                    | 0.0017                       | 0.0020                       | 0.0011                       |
| 111.044 | C <sub>6</sub> H <sub>7</sub> O <sub>2</sub> <sup>+</sup>                | 1,2-benzenediol; resorcinol                                   | 0.0050                       | 0.0037                       | 0.0096                       |
| 111.079 | C <sub>7</sub> H <sub>11</sub> O <sub>1</sub> <sup>+</sup>               | heptadienal                                                   | 0.0010                       | 0.0009                       | 0.0004                       |
| 112.045 | C <sub>5</sub> H <sub>6</sub> N <sub>1</sub> O <sub>2</sub> <sup>+</sup> | 2,3-pyridinediol                                              | 0.0006                       | 0.0005                       | 0.0007                       |
| 113.024 | C <sub>5</sub> H <sub>5</sub> O <sub>3</sub> <sup>+</sup>                | furoic acid                                                   | 0.0041                       | 0.0034                       | 0.0041                       |
| 113.057 | C <sub>6</sub> H <sub>9</sub> O <sub>2</sub> <sup>+</sup>                | hexendione                                                    | 0.0044                       | 0.0033                       | 0.0028                       |
| 113.094 | C <sub>7</sub> H <sub>13</sub> O <sub>1</sub> <sup>+</sup>               | cycloheptanone                                                | 0.0007                       | 0.0005                       | 0.0005                       |
| 114.056 | C <sub>5</sub> H <sub>8</sub> N <sub>1</sub> O <sub>2</sub> <sup>+</sup> | ethyl cyanoacetate                                            | 0.0005                       | 0.0004                       | 0.0004                       |
| 115.036 | C <sub>5</sub> H <sub>7</sub> O <sub>3</sub> <sup>+</sup>                | pentanetrione                                                 | 0.0037                       | 0.0030                       | 0.0023                       |
| 115.074 | C <sub>6</sub> H <sub>11</sub> O <sub>2</sub> <sup>+</sup>               | 2,5-hexanedione/ethyl-2-butenate                              | 0.0030                       | 0.0024                       | 0.0019                       |
| 117.017 | C <sub>4</sub> H <sub>5</sub> O <sub>4</sub> <sup>+</sup>                | maleic acid                                                   | 0.0014                       | 0.0013                       | 0.0019                       |
| 117.051 | C <sub>5</sub> H <sub>9</sub> O <sub>3</sub> <sup>+</sup>                | oxidized molecules of Isoprene                                | 0.0022                       | 0.0019                       | 0.0009                       |
| 119.033 | C <sub>4</sub> H <sub>7</sub> O <sub>4</sub> <sup>+</sup>                | oxidized molecules of Isoprene                                | 0.0035                       | 0.0032                       | 0.0028                       |
| 121.032 | C <sub>4</sub> H <sub>8</sub> O <sub>2</sub> S <sup>+</sup>              | s-ethyl o-methyl                                              | 0.0007                       | 0.0008                       | 0.0004                       |
| 121.065 | C <sub>8</sub> H <sub>6</sub> O <sub>1</sub> <sup>+</sup>                | acetophenone                                                  | 0.0004                       | 0.0004                       | 0.0005                       |
| 121.095 | C <sub>9</sub> H <sub>13</sub> <sup>+</sup>                              | C <sub>9</sub> -aromatics trimethylbenzene                    | 0.0005                       | 0.0006                       | 0.0004                       |
| 123.051 | C <sub>7</sub> H <sub>7</sub> O <sub>2</sub> <sup>+</sup>                | benzoic acid                                                  | 0.0027                       | 0.0029                       | 0.0009                       |
| 123.077 | C <sub>8</sub> H <sub>11</sub> O <sub>1</sub> <sup>+</sup>               | phenethyl alcohol; ethylphenol                                | 0.0010                       | 0.0009                       | 0.0003                       |
| 125.024 | C <sub>6</sub> H <sub>5</sub> O <sub>3</sub> <sup>+</sup>                | 2,5-furandicarboxaldehyde                                     | 0.0008                       | 0.0006                       | 0.0012                       |

|         |                                                                            |                                                    |                   |        |        |
|---------|----------------------------------------------------------------------------|----------------------------------------------------|-------------------|--------|--------|
| 125.059 | C <sub>7</sub> H <sub>9</sub> O <sub>2</sub> <sup>+</sup>                  | guaiacol + dihydroxy toluene                       | 0.0044            | 0.0037 | 0.0011 |
| 125.095 | C <sub>8</sub> H <sub>13</sub> O <sub>1</sub> <sup>+</sup>                 | oxidized molecules of monoterpenes                 | 0.0008            | 0.0007 | 0.0005 |
| 127.038 | C <sub>6</sub> H <sub>7</sub> O <sub>3</sub> <sup>+</sup>                  | methyl 2-furoate                                   | 0.0047            | 0.0035 | 0.0027 |
| 127.077 | C <sub>7</sub> H <sub>11</sub> O <sub>2</sub> <sup>+</sup>                 | oxidized molecules of monoterpene<br>(a-terpinene) | 0.0035            | 0.0029 | 0.0011 |
| 128.037 | C <sub>5</sub> H <sub>6</sub> N <sub>1</sub> O <sub>3</sub> <sup>+</sup>   | n-methylolmaleimide                                | 0.0006            | 0.0005 | 0.0004 |
| 129.017 | C <sub>5</sub> H <sub>5</sub> O <sub>4</sub> <sup>+</sup>                  | methanetetracarbaldehyde                           | 0.0015            | 0.0014 | 0.0011 |
| 129.054 | C <sub>6</sub> H <sub>9</sub> O <sub>3</sub> <sup>+</sup>                  | sotolone;<br>(hydroxymethyl)furan                  | 2,5-di-<br>0.0031 | 0.0026 | 0.0014 |
| 129.089 | C <sub>7</sub> H <sub>13</sub> O <sub>2</sub> <sup>+</sup>                 | cyclohexanecarboxylic acid                         | 0.0006            | 0.0005 | 0.0009 |
| 130.054 | C <sub>5</sub> H <sub>8</sub> N <sub>1</sub> O <sub>3</sub> <sup>+</sup>   | dimethadione                                       | 0.0006            | 0.0005 | 0.0003 |
| 131.033 | C <sub>3</sub> H <sub>7</sub> O <sub>4</sub> <sup>+</sup>                  | methylene butanedioic acid                         | 0.0032            | 0.0029 | 0.0020 |
| 131.071 | C <sub>6</sub> H <sub>11</sub> O <sub>3</sub> <sup>+</sup>                 | ethyl acetoacetate; (e)-3-methoxy-2-<br>butenoic   | 0.0009            | 0.0007 | 0.0004 |
| 133.016 | C <sub>4</sub> H <sub>5</sub> O <sub>5</sub> <sup>+</sup>                  | oxalacetic acid                                    | 0.0012            | 0.0011 | 0.0008 |
| 133.049 | C <sub>5</sub> H <sub>9</sub> O <sub>4</sub> <sup>+</sup>                  | oxidized molecules of Isoprene                     | 0.0031            | 0.0031 | 0.0012 |
| 133.098 | C <sub>10</sub> H <sub>13</sub> <sup>+</sup>                               | cymenene                                           | 0.0005            | 0.0005 | 0.0003 |
| 135.032 | C <sub>4</sub> H <sub>7</sub> O <sub>5</sub> <sup>+</sup>                  | malic acid                                         | 0.0008            | 0.0008 | 0.0004 |
| 135.076 | C <sub>9</sub> H <sub>11</sub> O <sub>1</sub> <sup>+</sup>                 | 1-phenyl-1-propanone                               | 0.0003            | 0.0004 | 0.0004 |
| 135.109 | C <sub>6</sub> H <sub>15</sub> O <sub>3</sub> <sup>+</sup>                 | dimethyl carbitol                                  | 0.0022            | 0.0036 | 0.0010 |
| 137.057 | C <sub>8</sub> H <sub>9</sub> O <sub>2</sub> <sup>+</sup>                  | methylbenzoic acid                                 | 0.0012            | 0.0010 | 0.0006 |
| 137.092 | C <sub>9</sub> H <sub>13</sub> O <sub>1</sub> <sup>+</sup>                 | p-cumenol                                          | 0.0007            | 0.0007 | 0.0002 |
| 139.037 | C <sub>7</sub> H <sub>7</sub> O <sub>3</sub> <sup>+</sup>                  | salicylic acid                                     | 0.0028            | 0.0026 | 0.0011 |
| 139.073 | C <sub>8</sub> H <sub>11</sub> O <sub>2</sub> <sup>+</sup>                 | oxidation products of ethylbenzene                 | 0.0019            | 0.0016 | 0.0007 |
| 139.111 | C <sub>9</sub> H <sub>15</sub> O <sub>1</sub> <sup>+</sup>                 | nopinone                                           | 0.0003            | 0.0004 | 0.0005 |
| 140.038 | C <sub>6</sub> H <sub>6</sub> N <sub>1</sub> O <sub>3</sub> <sup>+</sup>   | 2-nitrophenol                                      | 0.0004            | 0.0004 | 0.0003 |
| 141.053 | C <sub>7</sub> H <sub>9</sub> O <sub>3</sub> <sup>+</sup>                  | dicarbonyl epoxide                                 | 0.0074            | 0.0063 | 0.0014 |
| 141.090 | C <sub>8</sub> H <sub>13</sub> O <sub>2</sub> <sup>+</sup>                 | oxidized molecules of monoterpenes                 | 0.0012            | 0.0010 | 0.0006 |
| 142.059 | C <sub>6</sub> H <sub>8</sub> N <sub>1</sub> O <sub>3</sub> <sup>+</sup>   | methyl acetylcianoacetate                          | 0.0007            | 0.0006 | 0.0002 |
| 143.042 | C <sub>6</sub> H <sub>7</sub> O <sub>4</sub> <sup>+</sup>                  | hydroxy maltol                                     | 0.0018            | 0.0015 | 0.0013 |
| 143.075 | C <sub>7</sub> H <sub>11</sub> O <sub>3</sub> <sup>+</sup>                 | oxidized molecules of Terpinolene                  | 0.0024            | 0.0023 | 0.0008 |
| 143.106 | C <sub>8</sub> H <sub>15</sub> O <sub>2</sub> <sup>+</sup>                 | oxidized molecules of monoterpenes                 | 0.0005            | 0.0004 | 0.0006 |
| 144.033 | C <sub>5</sub> H <sub>6</sub> N <sub>1</sub> O <sub>4</sub> <sup>+</sup>   | 5-nitro-2-furanmethanol                            | 0.0003            | 0.0003 | 0.0003 |
| 145.049 | C <sub>6</sub> H <sub>9</sub> O <sub>4</sub> <sup>+</sup>                  | acetate furanol; dehydrated<br>levoglucosan        | 0.0085            | 0.0080 | 0.0024 |
| 146.051 | C <sub>5</sub> H <sub>8</sub> N <sub>1</sub> O <sub>4</sub> <sup>+</sup>   | pyruvylglycine                                     | 0.0007            | 0.0007 | 0.0003 |
| 147.028 | C <sub>3</sub> H <sub>7</sub> O <sub>5</sub> <sup>+</sup>                  | 2-oxopentanedioic acid                             | 0.0012            | 0.0012 | 0.0007 |
| 147.064 | C <sub>6</sub> H <sub>11</sub> O <sub>4</sub> <sup>+</sup>                 | hexanedioic acid                                   | 0.0008            | 0.0007 | 0.0004 |
| 149.038 | C <sub>5</sub> H <sub>9</sub> O <sub>5</sub> <sup>+</sup>                  | oxidized molecules of isoprene                     | 0.0019            | 0.0020 | 0.0012 |
| 149.063 | C <sub>9</sub> H <sub>9</sub> O <sub>2</sub> <sup>+</sup>                  | trans-cinnamic acid                                | 0.0006            | 0.0005 | 0.0003 |
| 151.034 | C <sub>8</sub> H <sub>7</sub> O <sub>3</sub> <sup>+</sup>                  | piperonal                                          | 0.0005            | 0.0005 | 0.0003 |
| 151.070 | C <sub>9</sub> H <sub>11</sub> O <sub>2</sub> <sup>+</sup>                 | benzyl acetate                                     | 0.0016            | 0.0014 | 0.0004 |
| 151.111 | C <sub>10</sub> H <sub>15</sub> O <sub>1</sub> <sup>+</sup>                | oxidized molecules of monoterpenes                 | 0.0014            | 0.0016 | 0.0004 |
| 152.115 | C <sub>9</sub> H <sub>14</sub> N <sub>1</sub> O <sub>1</sub> <sup>+</sup>  | 3-dimethylaminoanisole                             | 0.0005            | 0.0008 | 0.0001 |
| 153.052 | C <sub>8</sub> H <sub>9</sub> O <sub>3</sub> <sup>+</sup>                  | methyl salicylate; vanillin                        | 0.0017            | 0.0015 | 0.0006 |
| 153.089 | C <sub>9</sub> H <sub>13</sub> O <sub>2</sub> <sup>+</sup>                 | 4-ethyl guaiacol                                   | 0.0027            | 0.0026 | 0.0006 |
| 153.126 | C <sub>10</sub> H <sub>17</sub> O <sub>1</sub> <sup>+</sup>                | oxidized molecules of monoterpenes                 | 0.0004            | 0.0006 | 0.0004 |
| 155.032 | C <sub>7</sub> H <sub>7</sub> O <sub>4</sub> <sup>+</sup>                  | β-resorcylic acid                                  | 0.0013            | 0.0013 | 0.0008 |
| 155.071 | C <sub>8</sub> H <sub>11</sub> O <sub>3</sub> <sup>+</sup>                 | syringol                                           | 0.0050            | 0.0045 | 0.0009 |
| 155.106 | C <sub>9</sub> H <sub>15</sub> O <sub>2</sub> <sup>+</sup>                 | oxidized molecules of monoterpenes                 | 0.0005            | 0.0005 | 0.0006 |
| 156.033 | C <sub>6</sub> H <sub>6</sub> N <sub>1</sub> O <sub>4</sub> <sup>+</sup>   | 4-nitrocatechol                                    | 0.0004            | 0.0006 | 0.0002 |
| 156.073 | C <sub>7</sub> H <sub>10</sub> N <sub>1</sub> O <sub>3</sub> <sup>+</sup>  | ethyl 2-cyanoacetoacetate                          | 0.0006            | 0.0006 | 0.0002 |
| 157.049 | C <sub>7</sub> H <sub>9</sub> O <sub>4</sub> <sup>+</sup>                  | 1-(5-methyl-2-furanyl)-2-                          | 0.0077            | 0.0076 | 0.0020 |
| 157.096 | C <sub>8</sub> H <sub>13</sub> O <sub>3</sub> <sup>+</sup>                 | oxidized molecules of monoterpenes                 | 0.0011            | 0.0009 | 0.0004 |
| 158.051 | C <sub>6</sub> H <sub>8</sub> N <sub>1</sub> O <sub>4</sub> <sup>+</sup>   | 1-(acetoxy)pyrrolidine-2,5-                        | 0.0009            | 0.0009 | 0.0003 |
| 159.028 | C <sub>6</sub> H <sub>7</sub> O <sub>5</sub> <sup>+</sup>                  | tricarballic anhydride                             | 0.0016            | 0.0016 | 0.0012 |
| 159.067 | C <sub>7</sub> H <sub>11</sub> O <sub>4</sub> <sup>+</sup>                 | dimethyl 2-                                        | 0.0032            | 0.0029 | 0.0009 |
| 160.069 | C <sub>10</sub> H <sub>10</sub> N <sub>1</sub> O <sub>1</sub> <sup>+</sup> | acetylidole                                        | 0.0003            | 0.0003 | 0.0001 |
| 161.044 | C <sub>6</sub> H <sub>9</sub> O <sub>5</sub> <sup>+</sup>                  | 2-oxoadipic acid                                   | 0.0025            | 0.0027 | 0.0011 |
| 163.039 | C <sub>9</sub> H <sub>7</sub> O <sub>3</sub> <sup>+</sup>                  | 7-hydroxycoumarin                                  | 0.0009            | 0.0011 | 0.0005 |

|         |                        |                                                                         |        |        |        |
|---------|------------------------|-------------------------------------------------------------------------|--------|--------|--------|
| 163.058 | $C_6H_{11}O_5^+$       | levoglucosan                                                            | 0.0014 | 0.0012 | 0.0005 |
| 165.039 | $C_5H_9O_6^+$          | oxidized molecules of Isoprene                                          | 0.0012 | 0.0013 | 0.0006 |
| 165.089 | $C_{10}H_{13}O_2^+$    | methyl phenylpropionate; $\beta$ -phenethyl acetate                     | 0.0012 | 0.0011 | 0.0004 |
| 166.086 | $C_9H_{12}N_1O_2^+$    | benzocaine                                                              | 0.0004 | 0.0005 | 0.0001 |
| 167.035 | $C_8H_7O_4^+$          | isophthalic acid                                                        | 0.0044 | 0.0062 | 0.0013 |
| 167.065 | $C_9H_{11}O_3^+$       | acetoguaiacon                                                           | 0.0013 | 0.0011 | 0.0007 |
| 167.105 | $C_{10}H_{15}O_2^+$    | oxidized molecules of monoterpenes                                      | 0.0016 | 0.0015 | 0.0005 |
| 169.040 | $C_8H_9O_4^+$          | vanillic acid                                                           | 0.0010 | 0.0011 | 0.0008 |
| 169.090 | $C_9H_{13}O_3^+$       | 1,2,4-trimethoxybenzene; methylsyringol                                 | 0.0031 | 0.0027 | 0.0006 |
| 169.124 | $C_{10}H_{17}O_2^+$    | oxidized molecules of monoterpenes                                      | 0.0008 | 0.0010 | 0.0004 |
| 170.083 | $C_8H_{12}N_1O_3^+$    | dl-noradrenaline                                                        | 0.0004 | 0.0004 | 0.0001 |
| 171.068 | $C_8H_{11}O_4^+$       | oxidation products of ethylbenzene                                      | 0.0062 | 0.0064 | 0.0016 |
| 171.110 | $C_9H_{15}O_3^+$       | oxidized molecules of monoterpenes                                      | 0.0007 | 0.0006 | 0.0003 |
| 173.041 | $C_7H_9O_5^+$          | oxidation products of guaiacol                                          | 0.0028 | 0.0031 | 0.0012 |
| 173.077 | $C_8H_{13}O_4^+$       | oxidized molecules of monoterpenes                                      | 0.0020 | 0.0019 | 0.0006 |
| 174.045 | $C_6H_8N_1O_5^+$       | succinimidoglycolic acid                                                | 0.0004 | 0.0005 | 0.0002 |
| 175.060 | $C_7H_{11}O_5^+$       | shikimic acid                                                           | 0.0036 | 0.0035 | 0.0009 |
| 176.062 | $C_6H_{10}N_1O_5^+$    | n-acetyl-l-aspartic acid                                                | 0.0004 | 0.0004 | 0.0001 |
| 177.075 | $C_7H_{13}O_5^+$       | diacetin                                                                | 0.0005 | 0.0004 | 0.0002 |
| 181.083 | $C_{10}H_{13}O_3^+$    | anisyl acetate                                                          | 0.0012 | 0.0010 | 0.0003 |
| 183.063 | $C_9H_{11}O_4^+$       | unknown                                                                 | 0.0016 | 0.0018 | 0.0005 |
| 183.100 | $C_{10}H_{15}O_3^+$    | oxidized molecules of monoterpenes                                      | 0.0015 | 0.0014 | 0.0004 |
| 185.080 | $C_9H_{13}O_4^+$       | fragments of the $C_9H_{14}O_n$ series                                  | 0.0033 | 0.0031 | 0.0008 |
| 186.086 | $C_{12}H_{12}N_1O_1^+$ | unknown                                                                 | 0.0004 | 0.0004 | 0.0001 |
| 187.059 | $C_8H_{11}O_5^+$       | oxidation products of ethylbenzene                                      | 0.0040 | 0.0041 | 0.0016 |
| 187.095 | $C_9H_{15}O_4^+$       | oxidized molecules of monoterpenes                                      | 0.0005 | 0.0005 | 0.0001 |
| 188.062 | $C_{11}H_{10}N_1O_2^+$ | unknown                                                                 | 0.0006 | 0.0006 | 0.0002 |
| 189.039 | $C_7H_9O_6^+$          | fragment of $C_7H_{11}O_6^+$                                            | 0.0006 | 0.0007 | 0.0005 |
| 189.076 | $C_8H_{13}O_5^+$       | oxidized molecules of monoterpenes                                      | 0.0026 | 0.0028 | 0.0007 |
| 191.053 | $C_7H_{11}O_6^+$       | oxidation product of benzene                                            | 0.0013 | 0.0015 | 0.0006 |
| 193.083 | $C_{11}H_{13}O_3^+$    | unknown                                                                 | 0.0004 | 0.0004 | 0.0001 |
| 195.068 | $C_{10}H_{11}O_4^+$    | dimethyl 1,3-benzenedicarboxylate                                       | 0.0004 | 0.0004 | 0.0002 |
| 197.080 | $C_{10}H_{13}O_4^+$    | fragments of $C_{10}H_{15}O_4^+$                                        | 0.0013 | 0.0012 | 0.0004 |
| 199.051 | $C_9H_{11}O_5^+$       | unknown                                                                 | 0.0008 | 0.0009 | 0.0005 |
| 199.089 | $C_{10}H_{15}O_4^+$    | oxidized molecules of monoterpenes                                      | 0.0016 | 0.0015 | 0.0004 |
| 200.093 | $C_9H_{14}N_1O_4^+$    | fragments of monoterpene-derived organic nitrates $C_9H_{15}N_1O_{5-7}$ | 0.0004 | 0.0004 | 0.0001 |
| 201.077 | $C_9H_{13}O_5^+$       | unknown                                                                 | 0.0018 | 0.0018 | 0.0006 |
| 202.084 | $C_{12}H_{12}N_1O_2^+$ | unknown                                                                 | 0.0004 | 0.0004 | 0.0001 |
| 205.074 | $C_8H_{13}O_6^+$       | oxidized molecules of monoterpenes                                      | 0.0006 | 0.0007 | 0.0004 |
| 213.076 | $C_{10}H_{13}O_5^+$    | fragments of $C_{10}H_{15}O_5^+$                                        | 0.0008 | 0.0008 | 0.0004 |
| 215.051 | $C_9H_{11}O_6^+$       | unknown                                                                 | 0.0004 | 0.0005 | 0.0003 |
| 215.094 | $C_{10}H_{15}O_5^+$    | oxidized molecules of monoterpenes                                      | 0.0009 | 0.0009 | 0.0004 |
| 216.088 | $C_9H_{14}N_1O_5^+$    | fragments of monoterpene-derived organic nitrates $C_9H_{15}N_1O_{5-7}$ | 0.0005 | 0.0006 | 0.0001 |
| 217.071 | $C_9H_{13}O_6^+$       | unknown                                                                 | 0.0008 | 0.0009 | 0.0004 |
| 229.074 | $C_{10}H_{13}O_6^+$    | unknown                                                                 | 0.0004 | 0.0004 | 0.0002 |

Table S7: List of 171 SVOC ions and average (Ave) mixing ratios with standard deviation (Std) as well as measurement detection limit (MDL) included in the winter time semi volatile organic aerosol PMF analysis.

| m/z     | Tentative ion                                                             | Tentative compound                                            | Ave ( $\mu\text{g m}^{-3}$ ) | Std ( $\mu\text{g m}^{-3}$ ) | MDL ( $\mu\text{g m}^{-3}$ ) |
|---------|---------------------------------------------------------------------------|---------------------------------------------------------------|------------------------------|------------------------------|------------------------------|
| 69.031  | C <sub>4</sub> H <sub>5</sub> O <sub>1</sub> <sup>+</sup>                 | furan                                                         | 0.0013                       | 0.0012                       | 0.0007                       |
| 71.046  | C <sub>4</sub> H <sub>7</sub> O <sub>1</sub> <sup>+</sup>                 | methyl vinyl ketone + methacrolein                            | 0.0005                       | 0.0005                       | 0.0003                       |
| 73.025  | C <sub>3</sub> H <sub>5</sub> O <sub>2</sub> <sup>+</sup>                 | methylglyoxal/acrylic acid                                    | 0.0008                       | 0.0008                       | 0.0006                       |
| 83.047  | C <sub>5</sub> H <sub>7</sub> O <sub>1</sub> <sup>+</sup>                 | methyl furan                                                  | 0.0005                       | 0.0004                       | 0.0002                       |
| 84.047  | C <sub>4</sub> H <sub>6</sub> N <sub>1</sub> O <sub>1</sub> <sup>+</sup>  | 5-methyl-isoxazole                                            | 0.0002                       | 0.0002                       | 0.0002                       |
| 85.026  | C <sub>4</sub> H <sub>5</sub> O <sub>2</sub> <sup>+</sup>                 | furanone                                                      | 0.0041                       | 0.0037                       | 0.0027                       |
| 86.030  | C <sub>3</sub> H <sub>4</sub> N <sub>1</sub> O <sub>2</sub> <sup>+</sup>  | cyano acetic acid                                             | 0.0003                       | 0.0002                       | 0.0002                       |
| 87.042  | C <sub>4</sub> H <sub>7</sub> O <sub>2</sub> <sup>+</sup>                 | 2,3-butanedione                                               | 0.0014                       | 0.0016                       | 0.0010                       |
| 89.021  | C <sub>3</sub> H <sub>5</sub> O <sub>3</sub> <sup>+</sup>                 | butyric acid                                                  | 0.0004                       | 0.0004                       | 0.0001                       |
| 90.018  | C <sub>2</sub> H <sub>4</sub> N <sub>1</sub> O <sub>3</sub> <sup>+</sup>  | oxamic acid                                                   | 0.0006                       | 0.0006                       | 0.0005                       |
| 93.070  | C <sub>7</sub> H <sub>9</sub> <sup>+</sup>                                | toluene                                                       | 0.0005                       | 0.0006                       | 0.0003                       |
| 95.046  | C <sub>6</sub> H <sub>7</sub> O <sub>1</sub> <sup>+</sup>                 | phenol                                                        | 0.0005                       | 0.0004                       | 0.0003                       |
| 95.083  | C <sub>7</sub> H <sub>11</sub> <sup>+</sup>                               | fragment of monoterpenes                                      | 0.0003                       | 0.0003                       | 0.0002                       |
| 96.049  | C <sub>5</sub> H <sub>6</sub> N <sub>1</sub> O <sub>1</sub> <sup>+</sup>  | 4-pyridinol;                                                  | 0.0001                       | 0.0001                       | 0.0001                       |
| 97.026  | C <sub>5</sub> H <sub>5</sub> O <sub>2</sub> <sup>+</sup>                 | furfural                                                      | 0.0023                       | 0.0017                       | 0.0014                       |
| 97.062  | C <sub>6</sub> H <sub>9</sub> O <sub>1</sub> <sup>+</sup>                 | 2-ethylfuran/2,5-dimethylfuran                                | 0.0003                       | 0.0003                       | 0.0002                       |
| 98.024  | C <sub>4</sub> H <sub>4</sub> N <sub>1</sub> O <sub>2</sub> <sup>+</sup>  | 1h-pyrrole-2,5-dione                                          | 0.0002                       | 0.0002                       | 0.0001                       |
| 98.060  | C <sub>5</sub> H <sub>8</sub> N <sub>1</sub> O <sub>1</sub> <sup>+</sup>  | 4,5-dimethyl- oxazole                                         | 0.0001                       | 0.0001                       | 0.0002                       |
| 99.042  | C <sub>5</sub> H <sub>7</sub> O <sub>2</sub> <sup>+</sup>                 | furanone                                                      | 0.0015                       | 0.0012                       | 0.0009                       |
| 99.079  | C <sub>6</sub> H <sub>11</sub> O <sub>1</sub> <sup>+</sup>                | cyclohexanone                                                 | 0.0002                       | 0.0002                       | 0.0001                       |
| 100.040 | C <sub>4</sub> H <sub>6</sub> N <sub>1</sub> O <sub>2</sub> <sup>+</sup>  | succinimide                                                   | 0.0002                       | 0.0002                       | 0.0001                       |
| 100.076 | C <sub>5</sub> H <sub>10</sub> N <sub>1</sub> O <sub>1</sub> <sup>+</sup> | 2-piperidinone                                                | 0.0002                       | 0.0001                       | 0.0001                       |
| 101.021 | C <sub>4</sub> H <sub>5</sub> O <sub>3</sub> <sup>+</sup>                 | pentanedione                                                  | 0.0022                       | 0.0025                       | 0.0018                       |
| 101.058 | C <sub>5</sub> H <sub>9</sub> O <sub>2</sub> <sup>+</sup>                 | C <sub>5</sub> -hydroxy carbonyl (ISOPOOH conversion product) | 0.0006                       | 0.0006                       | 0.0004                       |
| 102.019 | C <sub>3</sub> H <sub>4</sub> N <sub>1</sub> O <sub>3</sub> <sup>+</sup>  | methyl isocyanatoformate                                      | 0.0002                       | 0.0002                       | 0.0001                       |
| 103.039 | C <sub>4</sub> H <sub>7</sub> O <sub>3</sub> <sup>+</sup>                 | propylene carbonate                                           | 0.0007                       | 0.0006                       | 0.0002                       |
| 104.035 | C <sub>3</sub> H <sub>6</sub> N <sub>1</sub> O <sub>3</sub> <sup>+</sup>  | 1-nitro-2-propanone                                           | 0.0002                       | 0.0001                       | 0.0001                       |
| 105.018 | C <sub>3</sub> H <sub>5</sub> O <sub>4</sub> <sup>+</sup>                 | propanedioic acid                                             | 0.0015                       | 0.0015                       | 0.0005                       |
| 107.074 | C <sub>4</sub> H <sub>11</sub> O <sub>3</sub> <sup>+</sup>                | trimethoxy methane                                            | 0.0007                       | 0.0012                       | 0.0006                       |
| 108.086 | C <sub>7</sub> H <sub>10</sub> N <sub>1</sub> <sup>+</sup>                | 3-ethyl-pyridine; 2,3-dimethyl-pyridine                       | 0.0002                       | 0.0003                       | 0.0001                       |
| 109.099 | C <sub>8</sub> H <sub>13</sub> <sup>+</sup>                               | fragment of sesquiterpenes                                    | 0.0005                       | 0.0006                       | 0.0002                       |
| 111.079 | C <sub>7</sub> H <sub>11</sub> O <sub>1</sub> <sup>+</sup>                | heptadienal                                                   | 0.0002                       | 0.0002                       | 0.0001                       |
| 113.024 | C <sub>5</sub> H <sub>5</sub> O <sub>3</sub> <sup>+</sup>                 | furoic acid                                                   | 0.0012                       | 0.0013                       | 0.0003                       |
| 113.057 | C <sub>6</sub> H <sub>9</sub> O <sub>2</sub> <sup>+</sup>                 | hexendione                                                    | 0.0007                       | 0.0006                       | 0.0003                       |
| 114.056 | C <sub>5</sub> H <sub>8</sub> N <sub>1</sub> O <sub>2</sub> <sup>+</sup>  | ethyl cyanoacetate                                            | 0.0001                       | 0.0001                       | 0.0001                       |
| 115.036 | C <sub>5</sub> H <sub>7</sub> O <sub>3</sub> <sup>+</sup>                 | pentanetrione                                                 | 0.0015                       | 0.0014                       | 0.0010                       |
| 115.074 | C <sub>6</sub> H <sub>11</sub> O <sub>2</sub> <sup>+</sup>                | 2,5-hexanedione/ethyl-2-butenolate                            | 0.0005                       | 0.0005                       | 0.0002                       |
| 116.035 | C <sub>4</sub> H <sub>6</sub> N <sub>1</sub> O <sub>3</sub> <sup>+</sup>  | 3-methyl-2,5-oxazolidine-dione                                | 0.0002                       | 0.0002                       | 0.0002                       |
| 117.017 | C <sub>4</sub> H <sub>5</sub> O <sub>4</sub> <sup>+</sup>                 | maleic acid                                                   | 0.0007                       | 0.0004                       | 0.0005                       |
| 117.051 | C <sub>5</sub> H <sub>9</sub> O <sub>3</sub> <sup>+</sup>                 | oxidized molecules of Isoprene                                | 0.0005                       | 0.0004                       | 0.0006                       |
| 119.033 | C <sub>4</sub> H <sub>7</sub> O <sub>4</sub> <sup>+</sup>                 | oxidized molecules of Isoprene                                | 0.0009                       | 0.0008                       | 0.0004                       |
| 123.051 | C <sub>7</sub> H <sub>7</sub> O <sub>2</sub> <sup>+</sup>                 | benzoic acid                                                  | 0.0006                       | 0.0005                       | 0.0017                       |
| 123.077 | C <sub>8</sub> H <sub>11</sub> O <sub>1</sub> <sup>+</sup>                | phenethyl alcohol; ethylphenol                                | 0.0002                       | 0.0002                       | 0.0003                       |
| 125.024 | C <sub>6</sub> H <sub>5</sub> O <sub>3</sub> <sup>+</sup>                 | 2,5-furandicarboxaldehyde                                     | 0.0007                       | 0.0005                       | 0.0007                       |
| 125.059 | C <sub>7</sub> H <sub>9</sub> O <sub>2</sub> <sup>+</sup>                 | guaiacol + dihydroxy toluene                                  | 0.0009                       | 0.0008                       | 0.0009                       |
| 125.095 | C <sub>8</sub> H <sub>13</sub> O <sub>1</sub> <sup>+</sup>                | oxidized molecules of monoterpenes                            | 0.0002                       | 0.0002                       | 0.0001                       |
| 127.038 | C <sub>6</sub> H <sub>7</sub> O <sub>3</sub> <sup>+</sup>                 | methyl 2-furoate                                              | 0.0024                       | 0.0019                       | 0.0010                       |
| 127.077 | C <sub>7</sub> H <sub>11</sub> O <sub>2</sub> <sup>+</sup>                | oxidized molecules of monoterpene (a-terpinene)               | 0.0006                       | 0.0005                       | 0.0013                       |
| 128.037 | C <sub>5</sub> H <sub>6</sub> N <sub>1</sub> O <sub>3</sub> <sup>+</sup>  | n-methylolmaleimide                                           | 0.0003                       | 0.0002                       | 0.0002                       |
| 129.017 | C <sub>5</sub> H <sub>5</sub> O <sub>4</sub> <sup>+</sup>                 | methanetetra-carbaldehyde                                     | 0.0006                       | 0.0005                       | 0.0005                       |
| 129.054 | C <sub>6</sub> H <sub>9</sub> O <sub>3</sub> <sup>+</sup>                 | sotolone; 2,5-di-(hydroxymethyl)furan                         | 0.0008                       | 0.0007                       | 0.0008                       |

|         |                                                                           |                                                 |        |        |        |
|---------|---------------------------------------------------------------------------|-------------------------------------------------|--------|--------|--------|
| 130.054 | C <sub>5</sub> H <sub>8</sub> N <sub>1</sub> O <sub>3</sub> <sup>+</sup>  | dimethadione                                    | 0.0002 | 0.0002 | 0.0001 |
| 131.033 | C <sub>5</sub> H <sub>7</sub> O <sub>4</sub> <sup>+</sup>                 | methylene butanedioic acid                      | 0.0012 | 0.0010 | 0.0005 |
| 131.071 | C <sub>6</sub> H <sub>11</sub> O <sub>3</sub> <sup>+</sup>                | ethyl acetoacetate; (e)-3-methoxy-2-butenic     | 0.0002 | 0.0001 | 0.0003 |
| 132.029 | C <sub>4</sub> H <sub>6</sub> N <sub>1</sub> O <sub>4</sub> <sup>+</sup>  | iminoaspartic acid                              | 0.0001 | 0.0001 | 0.0001 |
| 133.016 | C <sub>4</sub> H <sub>5</sub> O <sub>5</sub> <sup>+</sup>                 | oxalacetic acid                                 | 0.0002 | 0.0002 | 0.0002 |
| 133.049 | C <sub>5</sub> H <sub>9</sub> O <sub>4</sub> <sup>+</sup>                 | oxidized molecules of Isoprene                  | 0.0008 | 0.0007 | 0.0004 |
| 133.098 | C <sub>10</sub> H <sub>13</sub> <sup>+</sup>                              | cymene                                          | 0.0001 | 0.0002 | 0.0003 |
| 135.029 | C <sub>8</sub> H <sub>7</sub> O <sub>2</sub> <sup>+</sup>                 | malic acid                                      | 0.0002 | 0.0002 | 0.0002 |
| 135.109 | C <sub>6</sub> H <sub>15</sub> O <sub>3</sub> <sup>+</sup>                | dimethyl carbitol                               | 0.0006 | 0.0008 | 0.0002 |
| 137.057 | C <sub>8</sub> H <sub>9</sub> O <sub>2</sub> <sup>+</sup>                 | methylbenzoic acid                              | 0.0004 | 0.0004 | 0.0004 |
| 137.092 | C <sub>9</sub> H <sub>13</sub> O <sub>1</sub> <sup>+</sup>                | p-cumenol                                       | 0.0002 | 0.0002 | 0.0002 |
| 139.037 | C <sub>7</sub> H <sub>7</sub> O <sub>3</sub> <sup>+</sup>                 | salicylic acid                                  | 0.0006 | 0.0006 | 0.0019 |
| 139.073 | C <sub>8</sub> H <sub>11</sub> O <sub>2</sub> <sup>+</sup>                | oxidation products of ethylbenzene              | 0.0004 | 0.0004 | 0.0006 |
| 139.111 | C <sub>9</sub> H <sub>15</sub> O <sub>1</sub> <sup>+</sup>                | nopinone                                        | 0.0001 | 0.0001 | 0.0003 |
| 140.038 | C <sub>6</sub> H <sub>6</sub> N <sub>1</sub> O <sub>3</sub> <sup>+</sup>  | 2-nitrophenol                                   | 0.0002 | 0.0002 | 0.0002 |
| 141.053 | C <sub>7</sub> H <sub>9</sub> O <sub>3</sub> <sup>+</sup>                 | dicarbonyl epoxide                              | 0.0015 | 0.0012 | 0.0009 |
| 141.090 | C <sub>8</sub> H <sub>13</sub> O <sub>2</sub> <sup>+</sup>                | oxidized molecules of monoterpenes              | 0.0002 | 0.0003 | 0.0007 |
| 142.059 | C <sub>6</sub> H <sub>8</sub> N <sub>1</sub> O <sub>3</sub> <sup>+</sup>  | methyl acetylcianoacetate                       | 0.0002 | 0.0002 | 0.0001 |
| 143.042 | C <sub>6</sub> H <sub>7</sub> O <sub>4</sub> <sup>+</sup>                 | hydroxy maltol                                  | 0.0008 | 0.0007 | 0.0004 |
| 143.075 | C <sub>7</sub> H <sub>11</sub> O <sub>3</sub> <sup>+</sup>                | oxidized molecules of monoterpene (Terpinolene) | 0.0005 | 0.0004 | 0.0006 |
| 144.033 | C <sub>5</sub> H <sub>6</sub> N <sub>1</sub> O <sub>4</sub> <sup>+</sup>  | 5-nitro-2-furanmethanol                         | 0.0002 | 0.0001 | 0.0001 |
| 145.049 | C <sub>6</sub> H <sub>9</sub> O <sub>4</sub> <sup>+</sup>                 | acetate furanol; dehydrated levoglucosan        | 0.0024 | 0.0020 | 0.0006 |
| 146.051 | C <sub>5</sub> H <sub>8</sub> N <sub>1</sub> O <sub>4</sub> <sup>+</sup>  | pyruvylglycine                                  | 0.0002 | 0.0002 | 0.0001 |
| 147.028 | C <sub>5</sub> H <sub>7</sub> O <sub>5</sub> <sup>+</sup>                 | 2-oxopentanedioic acid                          | 0.0004 | 0.0003 | 0.0002 |
| 147.064 | C <sub>6</sub> H <sub>11</sub> O <sub>4</sub> <sup>+</sup>                | hexanedioic acid                                | 0.0003 | 0.0003 | 0.0002 |
| 149.024 | C <sub>8</sub> H <sub>5</sub> O <sub>3</sub> <sup>+</sup>                 | phthalic anhydride                              | 0.0004 | 0.0004 | 0.0002 |
| 149.063 | C <sub>9</sub> H <sub>9</sub> O <sub>2</sub> <sup>+</sup>                 | trans-cinnamic acid                             | 0.0005 | 0.0004 | 0.0002 |
| 149.096 | C <sub>10</sub> H <sub>13</sub> O <sub>1</sub> <sup>+</sup>               | estragole; anethole                             | 0.0001 | 0.0001 | 0.0002 |
| 151.034 | C <sub>8</sub> H <sub>7</sub> O <sub>3</sub> <sup>+</sup>                 | piperal                                         | 0.0002 | 0.0002 | 0.0002 |
| 151.070 | C <sub>9</sub> H <sub>11</sub> O <sub>2</sub> <sup>+</sup>                | benzyl acetate                                  | 0.0004 | 0.0003 | 0.0004 |
| 151.111 | C <sub>10</sub> H <sub>15</sub> O <sub>1</sub> <sup>+</sup>               | oxidized molecules of monoterpenes              | 0.0008 | 0.0011 | 0.0001 |
| 152.115 | C <sub>9</sub> H <sub>14</sub> N <sub>1</sub> O <sub>1</sub> <sup>+</sup> | 3-dimethylaminoanisole                          | 0.0001 | 0.0002 | 0.0001 |
| 153.052 | C <sub>8</sub> H <sub>9</sub> O <sub>3</sub> <sup>+</sup>                 | methyl salicylate; vanillin                     | 0.0005 | 0.0004 | 0.0003 |
| 153.089 | C <sub>9</sub> H <sub>13</sub> O <sub>2</sub> <sup>+</sup>                | 4-ethyl guaiacol                                | 0.0008 | 0.0008 | 0.0010 |
| 153.126 | C <sub>10</sub> H <sub>17</sub> O <sub>1</sub> <sup>+</sup>               | oxidized molecules of monoterpenes              | 0.0002 | 0.0003 | 0.0002 |
| 154.050 | C <sub>7</sub> H <sub>8</sub> N <sub>1</sub> O <sub>3</sub> <sup>+</sup>  | 4-nitroanisole; 2-nitrobenzyl alcohol           | 0.0001 | 0.0001 | 0.0001 |
| 155.032 | C <sub>7</sub> H <sub>7</sub> O <sub>4</sub> <sup>+</sup>                 | β-resorcylic acid                               | 0.0004 | 0.0003 | 0.0002 |
| 155.071 | C <sub>8</sub> H <sub>11</sub> O <sub>3</sub> <sup>+</sup>                | syringol                                        | 0.0008 | 0.0006 | 0.0008 |
| 155.106 | C <sub>9</sub> H <sub>15</sub> O <sub>2</sub> <sup>+</sup>                | oxidized molecules of monoterpenes              | 0.0002 | 0.0002 | 0.0006 |
| 156.033 | C <sub>6</sub> H <sub>6</sub> N <sub>1</sub> O <sub>4</sub> <sup>+</sup>  | 4-nitrocatechol                                 | 0.0008 | 0.0012 | 0.0001 |
| 157.049 | C <sub>7</sub> H <sub>9</sub> O <sub>4</sub> <sup>+</sup>                 | 1-(5-methyl-2-furanyl)-2-                       | 0.0010 | 0.0009 | 0.0007 |
| 157.096 | C <sub>8</sub> H <sub>13</sub> O <sub>3</sub> <sup>+</sup>                | oxidized molecules of monoterpenes              | 0.0003 | 0.0002 | 0.0004 |
| 158.051 | C <sub>6</sub> H <sub>8</sub> N <sub>1</sub> O <sub>4</sub> <sup>+</sup>  | 1-(acetoxy)pyrrolidine-2,5-                     | 0.0002 | 0.0002 | 0.0001 |
| 159.028 | C <sub>6</sub> H <sub>7</sub> O <sub>5</sub> <sup>+</sup>                 | tricarballic anhydride                          | 0.0004 | 0.0004 | 0.0002 |
| 159.067 | C <sub>7</sub> H <sub>11</sub> O <sub>4</sub> <sup>+</sup>                | dimethyl 2-                                     | 0.0005 | 0.0004 | 0.0001 |
| 161.044 | C <sub>6</sub> H <sub>9</sub> O <sub>5</sub> <sup>+</sup>                 | 2-oxoadipic acid                                | 0.0006 | 0.0006 | 0.0002 |
| 163.039 | C <sub>9</sub> H <sub>7</sub> O <sub>3</sub> <sup>+</sup>                 | 7-hydroxycoumarin                               | 0.0003 | 0.0003 | 0.0003 |
| 163.058 | C <sub>6</sub> H <sub>11</sub> O <sub>5</sub> <sup>+</sup>                | levoglucosan                                    | 0.0005 | 0.0005 | 0.0003 |
| 165.089 | C <sub>10</sub> H <sub>13</sub> O <sub>2</sub> <sup>+</sup>               | methyl phenylpropionate; β-phenethyl acetate    | 0.0005 | 0.0005 | 0.0002 |
| 166.050 | C <sub>8</sub> H <sub>8</sub> N <sub>1</sub> O <sub>3</sub> <sup>+</sup>  | 3-nitroacetophenone                             | 0.0001 | 0.0001 | 0.0000 |
| 166.086 | C <sub>9</sub> H <sub>12</sub> N <sub>1</sub> O <sub>2</sub> <sup>+</sup> | benzocaine                                      | 0.0001 | 0.0001 | 0.0000 |
| 167.035 | C <sub>8</sub> H <sub>7</sub> O <sub>4</sub> <sup>+</sup>                 | isophthalic acid                                | 0.0003 | 0.0003 | 0.0002 |
| 167.065 | C <sub>9</sub> H <sub>11</sub> O <sub>3</sub> <sup>+</sup>                | acetoguaiacon                                   | 0.0004 | 0.0003 | 0.0004 |
| 167.105 | C <sub>10</sub> H <sub>15</sub> O <sub>2</sub> <sup>+</sup>               | oxidized molecules of monoterpenes              | 0.0006 | 0.0006 | 0.0005 |
| 169.040 | C <sub>8</sub> H <sub>9</sub> O <sub>4</sub> <sup>+</sup>                 | vanillic acid                                   | 0.0004 | 0.0004 | 0.0004 |

|         |                                                                            |                                                                                                                     |        |        |        |
|---------|----------------------------------------------------------------------------|---------------------------------------------------------------------------------------------------------------------|--------|--------|--------|
| 169.090 | C <sub>9</sub> H <sub>13</sub> O <sub>3</sub> <sup>+</sup>                 | 1,2,4-trimethoxybenzene;<br>methysyringol                                                                           | 0.0008 | 0.0006 | 0.0006 |
| 169.124 | C <sub>10</sub> H <sub>17</sub> O <sub>2</sub> <sup>+</sup>                | oxidized molecules of monoterpenes                                                                                  | 0.0005 | 0.0007 | 0.0003 |
| 170.045 | C <sub>7</sub> H <sub>8</sub> N <sub>1</sub> O <sub>4</sub> <sup>+</sup>   | 4-nitroguaiacol                                                                                                     | 0.0005 | 0.0008 | 0.0001 |
| 171.068 | C <sub>8</sub> H <sub>11</sub> O <sub>4</sub> <sup>+</sup>                 | oxidation products of ethylbenzene                                                                                  | 0.0008 | 0.0006 | 0.0005 |
| 171.110 | C <sub>9</sub> H <sub>15</sub> O <sub>3</sub> <sup>+</sup>                 | oxidized molecules of monoterpenes                                                                                  | 0.0004 | 0.0003 | 0.0003 |
| 173.041 | C <sub>7</sub> H <sub>9</sub> O <sub>5</sub> <sup>+</sup>                  | oxidation products of guaiacol                                                                                      | 0.0005 | 0.0005 | 0.0003 |
| 173.077 | C <sub>8</sub> H <sub>13</sub> O <sub>4</sub> <sup>+</sup>                 | oxidized molecules of monoterpenes                                                                                  | 0.0004 | 0.0003 | 0.0003 |
| 174.045 | C <sub>6</sub> H <sub>8</sub> N <sub>1</sub> O <sub>5</sub> <sup>+</sup>   | succinimide glycolic acid                                                                                           | 0.0001 | 0.0001 | 0.0001 |
| 175.060 | C <sub>7</sub> H <sub>11</sub> O <sub>5</sub> <sup>+</sup>                 | shikimic acid                                                                                                       | 0.0006 | 0.0005 | 0.0001 |
| 177.039 | C <sub>6</sub> H <sub>8</sub> O <sub>6</sub> <sup>+</sup>                  | vitamin C                                                                                                           | 0.0004 | 0.0003 | 0.0002 |
| 178.050 | C <sub>9</sub> H <sub>8</sub> N <sub>1</sub> O <sub>3</sub> <sup>+</sup>   | 4-nitrocinnamaldehyde                                                                                               | 0.0001 | 0.0001 | 0.0001 |
| 179.034 | C <sub>9</sub> H <sub>7</sub> O <sub>4</sub> <sup>+</sup>                  | ninhydrin                                                                                                           | 0.0003 | 0.0003 | 0.0002 |
| 179.092 | C <sub>7</sub> H <sub>15</sub> O <sub>5</sub> <sup>+</sup>                 | bis(2-methoxyethyl)                                                                                                 | 0.0003 | 0.0003 | 0.0001 |
| 181.083 | C <sub>10</sub> H <sub>13</sub> O <sub>3</sub> <sup>+</sup>                | anisyl acetate                                                                                                      | 0.0005 | 0.0004 | 0.0003 |
| 182.045 | C <sub>8</sub> H <sub>8</sub> N <sub>1</sub> O <sub>4</sub> <sup>+</sup>   | methyl 3-nitrobenzoate                                                                                              | 0.0001 | 0.0001 | 0.0001 |
| 183.063 | C <sub>9</sub> H <sub>11</sub> O <sub>4</sub> <sup>+</sup>                 | unknown                                                                                                             | 0.0006 | 0.0005 | 0.0004 |
| 183.100 | C <sub>10</sub> H <sub>15</sub> O <sub>3</sub> <sup>+</sup>                | oxidized molecules of monoterpenes                                                                                  | 0.0004 | 0.0004 | 0.0003 |
| 184.061 | C <sub>7</sub> H <sub>6</sub> N <sub>1</sub> O <sub>5</sub> <sup>+</sup>   | unknown                                                                                                             | 0.0002 | 0.0003 | 0.0001 |
| 185.045 | C <sub>8</sub> H <sub>9</sub> O <sub>5</sub> <sup>+</sup>                  | unknown                                                                                                             | 0.0003 | 0.0003 | 0.0002 |
| 185.080 | C <sub>9</sub> H <sub>13</sub> O <sub>4</sub> <sup>+</sup>                 | fragments of the C <sub>9</sub> H <sub>14</sub> O <sub>n</sub> series                                               | 0.0007 | 0.0006 | 0.0004 |
| 185.117 | C <sub>10</sub> H <sub>17</sub> O <sub>3</sub> <sup>+</sup>                | oxidized molecules of monoterpenes                                                                                  | 0.0002 | 0.0003 | 0.0003 |
| 186.040 | C <sub>7</sub> H <sub>8</sub> N <sub>1</sub> O <sub>5</sub> <sup>+</sup>   | unknown                                                                                                             | 0.0002 | 0.0002 | 0.0001 |
| 186.086 | C <sub>12</sub> H <sub>12</sub> N <sub>1</sub> O <sub>1</sub> <sup>+</sup> | unknown                                                                                                             | 0.0001 | 0.0001 | 0.0001 |
| 187.059 | C <sub>8</sub> H <sub>11</sub> O <sub>5</sub> <sup>+</sup>                 | oxidation products of ethylbenzene                                                                                  | 0.0007 | 0.0007 | 0.0003 |
| 187.097 | C <sub>9</sub> H <sub>15</sub> O <sub>4</sub> <sup>+</sup>                 | pinic acid                                                                                                          | 0.0003 | 0.0002 | 0.0002 |
| 188.055 | C <sub>7</sub> H <sub>10</sub> N <sub>1</sub> O <sub>5</sub> <sup>+</sup>  | unknown                                                                                                             | 0.0001 | 0.0001 | 0.0000 |
| 189.055 | C <sub>11</sub> H <sub>9</sub> O <sub>3</sub> <sup>+</sup>                 | unknown                                                                                                             | 0.0003 | 0.0002 | 0.0002 |
| 189.076 | C <sub>8</sub> H <sub>13</sub> O <sub>5</sub> <sup>+</sup>                 | oxidized molecules of monoterpenes                                                                                  | 0.0003 | 0.0002 | 0.0002 |
| 190.050 | C <sub>10</sub> H <sub>8</sub> N <sub>1</sub> O <sub>3</sub> <sup>+</sup>  | unknown                                                                                                             | 0.0001 | 0.0001 | 0.0000 |
| 191.092 | C <sub>10</sub> H <sub>23</sub> O <sub>3</sub> <sup>+</sup>                | unknown                                                                                                             | 0.0003 | 0.0003 | 0.0003 |
| 193.034 | C <sub>6</sub> H <sub>9</sub> O <sub>7</sub> <sup>+</sup>                  | citric cid                                                                                                          | 0.0002 | 0.0002 | 0.0001 |
| 194.045 | C <sub>9</sub> H <sub>8</sub> N <sub>1</sub> O <sub>4</sub> <sup>+</sup>   | unknown                                                                                                             | 0.0002 | 0.0002 | 0.0001 |
| 195.068 | C <sub>10</sub> H <sub>11</sub> O <sub>4</sub> <sup>+</sup>                | dimethyl 1,3-benzenedicarboxylate                                                                                   | 0.0001 | 0.0001 | 0.0001 |
| 197.080 | C <sub>10</sub> H <sub>13</sub> O <sub>4</sub> <sup>+</sup>                | fragments of C <sub>10</sub> H <sub>15</sub> O <sub>4</sub> <sup>+</sup>                                            | 0.0002 | 0.0002 | 0.0003 |
| 199.051 | C <sub>9</sub> H <sub>11</sub> O <sub>5</sub> <sup>+</sup>                 | unknown                                                                                                             | 0.0001 | 0.0002 | 0.0001 |
| 199.089 | C <sub>10</sub> H <sub>15</sub> O <sub>4</sub> <sup>+</sup>                | oxidized molecules of monoterpenes                                                                                  | 0.0005 | 0.0004 | 0.0002 |
| 200.055 | C <sub>8</sub> H <sub>10</sub> N <sub>1</sub> O <sub>5</sub> <sup>+</sup>  | unknown                                                                                                             | 0.0004 | 0.0004 | 0.0001 |
| 200.093 | C <sub>9</sub> H <sub>14</sub> N <sub>1</sub> O <sub>4</sub> <sup>+</sup>  | fragments of monoterpene-derived<br>organic nitrates C <sub>9</sub> H <sub>15</sub> N <sub>1</sub> O <sub>5.7</sub> | 0.0004 | 0.0003 | 0.0001 |
| 201.055 | C <sub>8</sub> H <sub>9</sub> O <sub>6</sub> <sup>+</sup>                  | unknown                                                                                                             | 0.0001 | 0.0002 | 0.0002 |
| 201.112 | C <sub>10</sub> H <sub>17</sub> O <sub>4</sub> <sup>+</sup>                | oxidized molecules of monoterpenes                                                                                  | 0.0001 | 0.0001 | 0.0004 |
| 207.050 | C <sub>7</sub> H <sub>11</sub> O <sub>7</sub> <sup>+</sup>                 | unknown                                                                                                             | 0.0003 | 0.0003 | 0.0001 |
| 207.102 | C <sub>16</sub> H <sub>15</sub> <sup>+</sup>                               | unknown                                                                                                             | 0.0003 | 0.0003 | 0.0001 |
| 213.076 | C <sub>10</sub> H <sub>13</sub> O <sub>5</sub> <sup>+</sup>                | fragments of C <sub>10</sub> H <sub>15</sub> O <sub>5</sub> <sup>+</sup>                                            | 0.0002 | 0.0002 | 0.0002 |
| 215.092 | C <sub>14</sub> H <sub>15</sub> O <sub>2</sub> <sup>+</sup>                | unknown                                                                                                             | 0.0002 | 0.0002 | 0.0001 |
| 216.088 | C <sub>9</sub> H <sub>14</sub> N <sub>1</sub> O <sub>5</sub> <sup>+</sup>  | fragments of monoterpene-derived<br>organic nitrates C <sub>9</sub> H <sub>15</sub> N <sub>1</sub> O <sub>5.7</sub> | 0.0003 | 0.0003 | 0.0001 |
| 217.071 | C <sub>9</sub> H <sub>13</sub> O <sub>6</sub> <sup>+</sup>                 | unknown                                                                                                             | 0.0002 | 0.0002 | 0.0001 |
| 217.107 | C <sub>14</sub> H <sub>17</sub> O <sub>2</sub> <sup>+</sup>                | unknown                                                                                                             | 0.0003 | 0.0003 | 0.0001 |
| 219.081 | C <sub>16</sub> H <sub>11</sub> O <sub>1</sub> <sup>+</sup>                | unknown                                                                                                             | 0.0002 | 0.0002 | 0.0001 |
| 224.071 | C <sub>14</sub> H <sub>10</sub> N <sub>1</sub> O <sub>2</sub> <sup>+</sup> | unknown                                                                                                             | 0.0002 | 0.0002 | 0.0003 |
| 225.149 | C <sub>16</sub> H <sub>17</sub> O <sub>1</sub> <sup>+</sup>                | unknown                                                                                                             | 0.0003 | 0.0003 | 0.0001 |
| 231.102 | C <sub>14</sub> H <sub>15</sub> O <sub>3</sub> <sup>+</sup>                | unknown                                                                                                             | 0.0002 | 0.0001 | 0.0001 |
| 233.133 | C <sub>17</sub> H <sub>13</sub> O <sub>1</sub> <sup>+</sup>                | unknown                                                                                                             | 0.0003 | 0.0004 | 0.0001 |
| 235.076 | C <sub>16</sub> H <sub>11</sub> O <sub>2</sub> <sup>+</sup>                | unknown                                                                                                             | 0.0003 | 0.0003 | 0.0001 |
| 239.092 | C <sub>12</sub> H <sub>15</sub> O <sub>5</sub> <sup>+</sup>                | unknown                                                                                                             | 0.0001 | 0.0001 | 0.0003 |
| 239.237 | C <sub>16</sub> H <sub>31</sub> O <sub>1</sub> <sup>+</sup>                | fragments of C <sub>16</sub> H <sub>33</sub> O <sub>2</sub> <sup>+</sup>                                            | 0.0001 | 0.0001 | 0.0002 |
| 243.065 | C <sub>14</sub> H <sub>11</sub> O <sub>4</sub> <sup>+</sup>                | unknown                                                                                                             | 0.0002 | 0.0001 | 0.0001 |
| 247.112 | C <sub>18</sub> H <sub>15</sub> O <sub>1</sub> <sup>+</sup>                | unknown                                                                                                             | 0.0003 | 0.0004 | 0.0000 |

|         |                     |                                                      |        |        |        |
|---------|---------------------|------------------------------------------------------|--------|--------|--------|
| 255.232 | $C_{16}H_{31}O_2^+$ | fragments of $C_{16}H_{33}O_2^+$                     | 0.0001 | 0.0001 | 0.0004 |
| 257.248 | $C_{16}H_{33}O_2^+$ | corresponding to palmitic acid                       | 0.0004 | 0.0006 | 0.0004 |
| 259.112 | $C_{19}H_{15}O_1^+$ | unknown                                              | 0.0001 | 0.0002 | 0.0001 |
| 275.258 | $C_{16}H_{35}O_3^+$ | $C_{16}H_{33}O_2(H_2O)^+$                            | 0.0004 | 0.0006 | 0.0005 |
| 281.248 | $C_{18}H_{33}O_2^+$ | fragments of $C_{18}H_{35}O_2^+$                     | 0.0001 | 0.0001 | 0.0001 |
| 283.263 | $C_{18}H_{35}O_2^+$ | oleic acid; fragment of stearic acid<br>(fatty acid) | 0.0007 | 0.0010 | 0.0002 |
| 285.279 | $C_{18}H_{37}O_2^+$ | stearic acid (fatty acid)                            | 0.0002 | 0.0003 | 0.0002 |

---

The PMF factor selection for summertime semi-volatile organic aerosol (SVOA) measurements followed the same evaluation procedure as described for the VOC datasets. The decrease in  $Q/Q_{exp}$  becomes gradual beyond five factors (Fig. S11a), indicating limited additional improvement with increasing factor number. The selected five-factor solution provides a stable and physically interpretable representation of the dataset, supported by scaled residuals centered near zero (Fig. S11b).

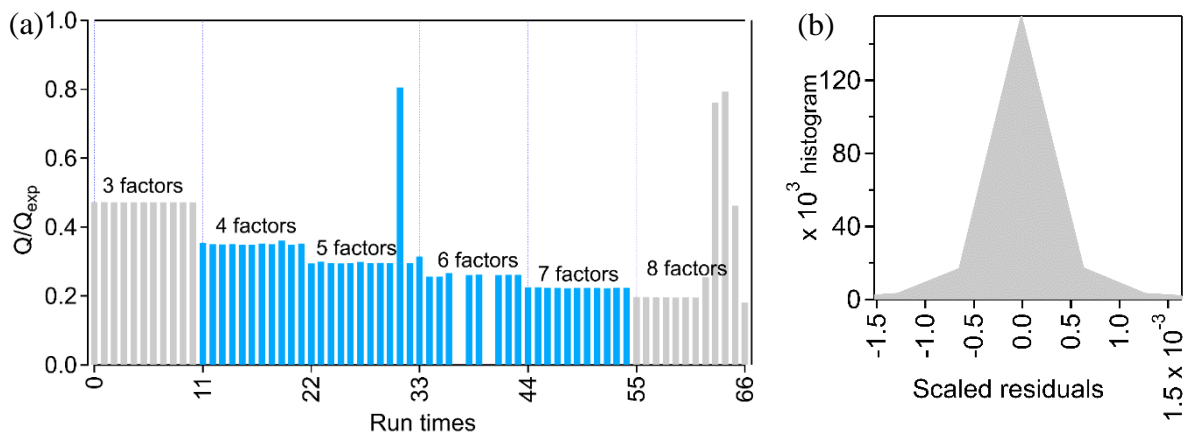

Figure S11. (a)  $Q/Q_{exp}$  values obtained from multiple PMF runs for Summer semi-volatile organic aerosol measurements. (b) Histogram of scaled residuals ( $e_{ij}/\sigma_{ij}$ ) for the selected PMF solution (five factors), showing a distribution centered near zero and indicating an adequate model fit.

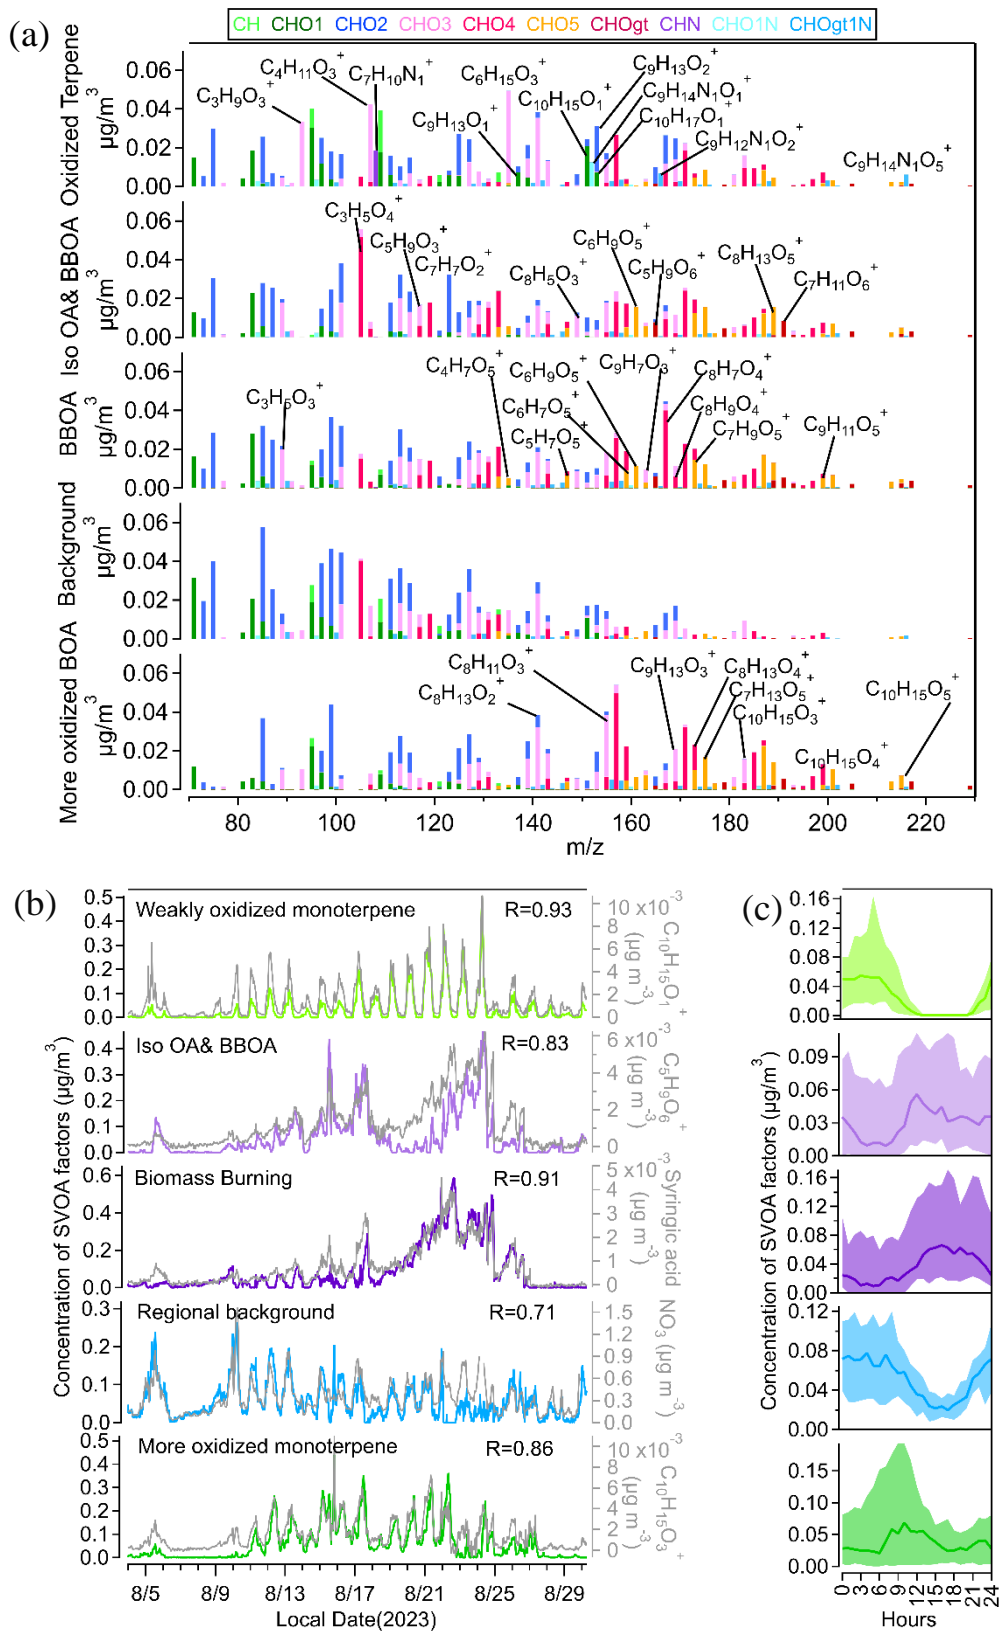

Figure S12 Semi-volatile OA (SVOA) apportionment in summer. (a) Normalized SVOA factor spectra from PMF analysis on the  $m/z$  peaks in summer time; (b) Time series of SVOA factors including oxidized terpene, iso OA & BBOA, BBOA, background, and more oxidized BOA; (c) Median diurnal variations in SVOA factors during summer.

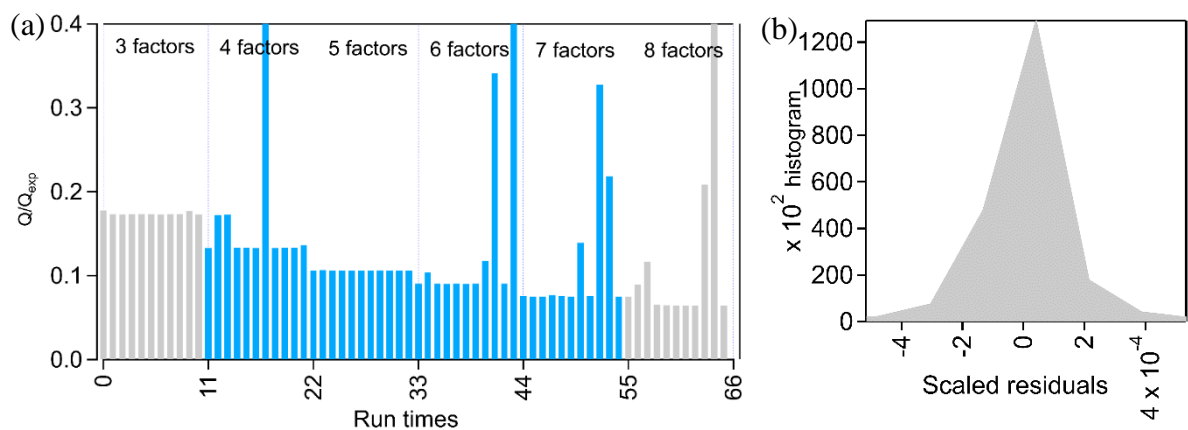

Figure S13. (a)  $Q/Q_{exp}$  values obtained from multiple PMF runs for March semi-volatile organic aerosol measurements. (b) Histogram of scaled residuals ( $e_{ij}/\sigma_{ij}$ ) for the selected PMF solution (five factors), showing a distribution centered near zero and indicating an adequate model fit.

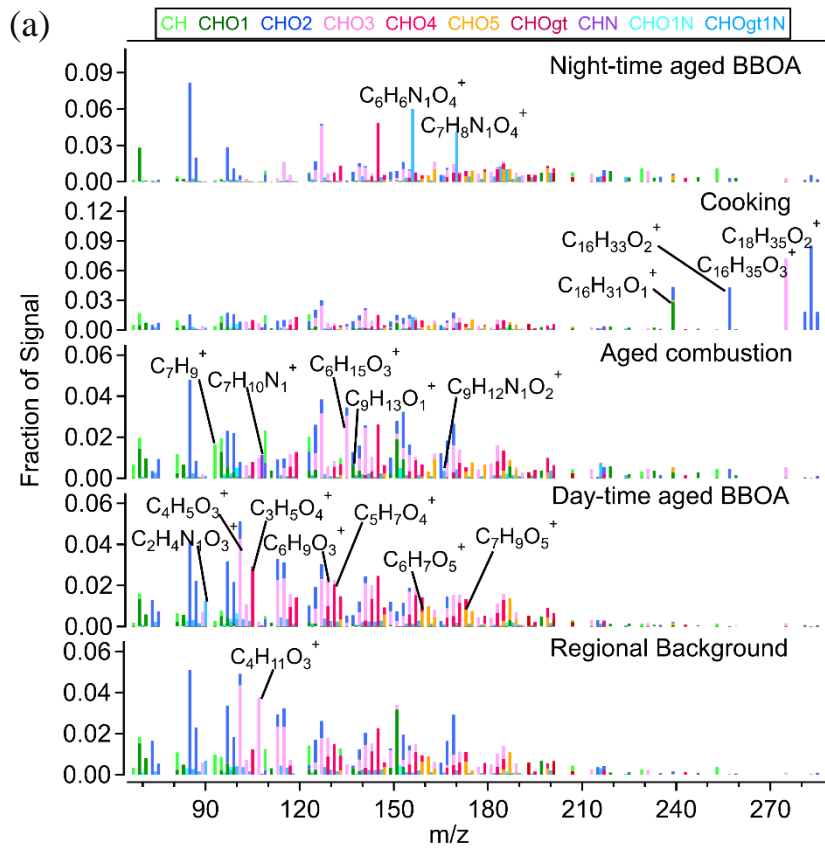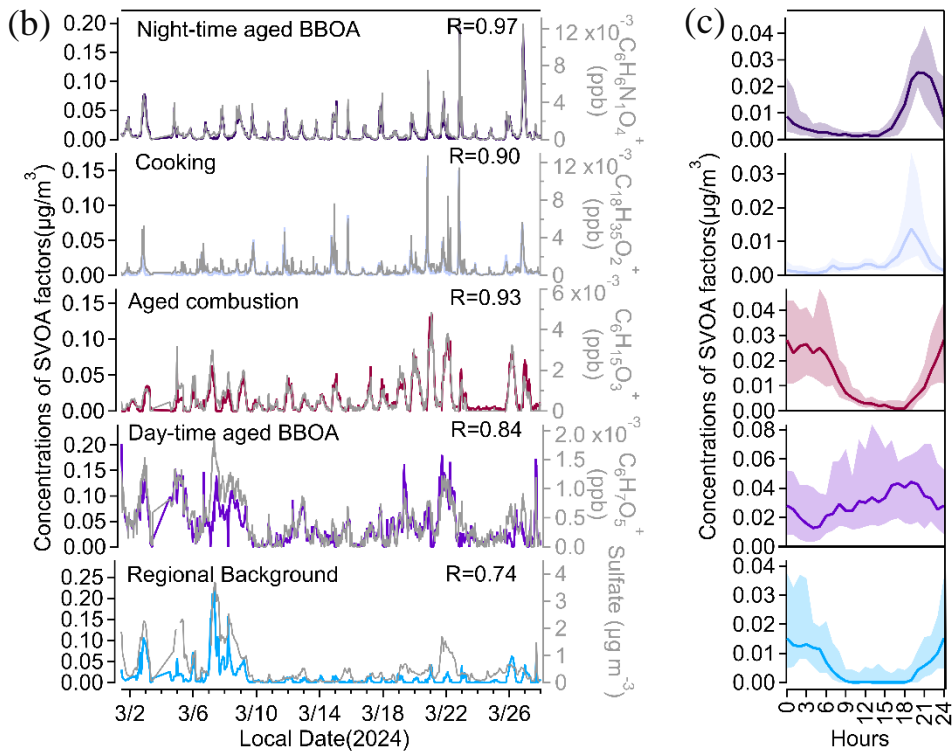

Figure S14 (a) Normalized SVOA factor spectra from PMF analysis on the  $m/z$  peaks in winter time; (b) Time series of SVOA factors including night-time aged BBOA, cooking, aged combustion, day-time aged BBOA, and regional background OA; and (c) Median diurnal variations in SVOA factors during winter time

Table S8: Major SVOC mass peaks from Charon-PTR-MS correlated to the five semi volatile organic aerosol related source factors in summer

| Mass peak (m/z) | Tentative ion                                                             | Tentative compound                                | PMF factor related          | Correlation to PMF factor |
|-----------------|---------------------------------------------------------------------------|---------------------------------------------------|-----------------------------|---------------------------|
| 108.08          | C <sub>7</sub> H <sub>10</sub> N <sub>1</sub> <sup>+</sup>                | 3-ethyl-pyridine                                  |                             | 0.99                      |
| 152.11          | C <sub>9</sub> H <sub>14</sub> N <sub>1</sub> O <sub>1</sub> <sup>+</sup> | alcohols or aldehydes with nitrogen groups        |                             | 0.98                      |
| 166.09          | C <sub>9</sub> H <sub>12</sub> N <sub>1</sub> O <sub>2</sub> <sup>+</sup> | alcohols or aldehydes with nitrogen groups        |                             | 0.93                      |
| 135.10          | C <sub>6</sub> H <sub>15</sub> O <sub>3</sub> <sup>+</sup>                | dimethyl carbitol                                 |                             | 0.93                      |
| 107.07          | C <sub>4</sub> H <sub>11</sub> O <sub>3</sub> <sup>+</sup>                | trimethoxy methane                                |                             | 0.93                      |
| 151.11          | C <sub>10</sub> H <sub>15</sub> O <sub>1</sub> <sup>+</sup>               | oxidized molecules of monoterpenes                | Weakly oxidized monoterpene | 0.93                      |
| 216.09          | C <sub>9</sub> H <sub>14</sub> N <sub>1</sub> O <sub>5</sub> <sup>+</sup> | fragments of monoterpene-derived organic nitrates |                             | 0.91                      |
| 137.10          | C <sub>9</sub> H <sub>13</sub> O <sub>1</sub> <sup>+</sup>                | p-cumenol                                         |                             | 0.91                      |
| 93.06           | C <sub>3</sub> H <sub>9</sub> O <sub>3</sub> <sup>+</sup>                 | 1,2,3-propanetriol                                |                             | 0.90                      |
| 153.13          | C <sub>10</sub> H <sub>17</sub> O <sub>1</sub> <sup>+</sup>               | oxidized molecules of monoterpenes                |                             | 0.89                      |
| 153.09          | C <sub>9</sub> H <sub>13</sub> O <sub>2</sub> <sup>+</sup>                | 4-ethyl guaiacol                                  |                             | 0.85                      |
| 123.04          | C <sub>7</sub> H <sub>7</sub> O <sub>2</sub> <sup>+</sup>                 | benzoic acid                                      |                             | 0.95                      |
| 105.02          | C <sub>3</sub> H <sub>5</sub> O <sub>4</sub> <sup>+</sup>                 | originates from the oxidation of ISOPOOH          |                             | 0.85                      |
| 191.06          | C <sub>7</sub> H <sub>11</sub> O <sub>6</sub> <sup>+</sup>                | oxidation of o-cresol                             |                             | 0.84                      |
| 161.05          | C <sub>6</sub> H <sub>9</sub> O <sub>5</sub> <sup>+</sup>                 | oxidation product of benzene                      |                             | 0.84                      |
| 165.04          | C <sub>5</sub> H <sub>9</sub> O <sub>6</sub> <sup>+</sup>                 | oxidized molecules of isoprene                    | Oxidized Isoprene & BBOA    | 0.83                      |
| 189.08          | C <sub>8</sub> H <sub>13</sub> O <sub>5</sub> <sup>+</sup>                | oxidized molecules of monoterpenes                |                             | 0.83                      |
| 149.02          | C <sub>8</sub> H <sub>5</sub> O <sub>3</sub> <sup>+</sup>                 | phthalic anhydride                                |                             | 0.83                      |
| 117.06          | C <sub>5</sub> H <sub>9</sub> O <sub>3</sub> <sup>+</sup>                 | oxidized molecules of isoprene                    |                             | 0.82                      |
| 167.03          | C <sub>8</sub> H <sub>7</sub> O <sub>4</sub> <sup>+</sup>                 | fragment of vanillic acid                         |                             | 0.96                      |
| 163.04          | C <sub>9</sub> H <sub>7</sub> O <sub>3</sub> <sup>+</sup>                 | fragment of syringic acid                         |                             | 0.95                      |
| 199.06          | C <sub>9</sub> H <sub>11</sub> O <sub>5</sub> <sup>+</sup>                | syringic acid                                     |                             | 0.91                      |
| 159.03          | C <sub>6</sub> H <sub>7</sub> O <sub>5</sub> <sup>+</sup>                 | oxidation products of guaiacol                    |                             | 0.90                      |
| 147.03          | C <sub>5</sub> H <sub>7</sub> O <sub>5</sub> <sup>+</sup>                 | 2-oxopentanedioic acid                            |                             | 0.89                      |
| 189.04          | C <sub>7</sub> H <sub>9</sub> O <sub>6</sub> <sup>+</sup>                 | oxidation of o-cresol                             | BBOA                        | 0.88                      |
| 169.05          | C <sub>8</sub> H <sub>9</sub> O <sub>4</sub> <sup>+</sup>                 | vanillic acid                                     |                             | 0.88                      |
| 89.02           | C <sub>3</sub> H <sub>5</sub> O <sub>3</sub> <sup>+</sup>                 | pyruvic acid                                      |                             | 0.87                      |
| 173.05          | C <sub>7</sub> H <sub>9</sub> O <sub>5</sub> <sup>+</sup>                 | oxidation products of guaiacol                    |                             | 0.86                      |
| 135.03          | C <sub>4</sub> H <sub>7</sub> O <sub>5</sub> <sup>+</sup>                 | pentanedioic acid                                 |                             | 0.86                      |
| 161.04          | C <sub>6</sub> H <sub>9</sub> O <sub>5</sub> <sup>+</sup>                 | 2-oxoadipic acid                                  |                             | 0.85                      |
|                 | AMS-NO <sub>3</sub>                                                       | Nitrate                                           | Regional background         | 0.71                      |
| 183.10          | C <sub>10</sub> H <sub>15</sub> O <sub>3</sub> <sup>+</sup>               | oxidized molecules of monoterpenes                |                             | 0.86                      |
| 199.10          | C <sub>10</sub> H <sub>15</sub> O <sub>4</sub> <sup>+</sup>               | oxidized molecules of monoterpenes                | More oxidized monoterpene   | 0.85                      |

|        |                     |                                    |      |
|--------|---------------------|------------------------------------|------|
| 215.09 | $C_{10}H_{15}O_5^+$ | oxidized molecules of monoterpenes | 0.84 |
| 155.07 | $C_8H_{11}O_3^+$    | syringol                           | 0.83 |
| 169.09 | $C_9H_{13}O_3^+$    | Methylsyringol                     | 0.81 |
| 141.09 | $C_8H_{13}O_2^+$    | oxidized molecules of monoterpenes | 0.81 |
| 173.08 | $C_8H_{13}O_4^+$    | oxidized molecules of monoterpenes | 0.80 |
| 177.08 | $C_7H_{13}O_5^+$    | diacetin                           | 0.79 |

---

Table S9 Major SVOC mass peaks from Charon-PTR-MS correlated with the five semi volatile organic aerosol factors in winter time

| Mass peak (m/z) | Tentative ion                                                             | Tentative compound                                                                    | PMF factor related   | Correlation to PMF factor |
|-----------------|---------------------------------------------------------------------------|---------------------------------------------------------------------------------------|----------------------|---------------------------|
| 156.03          | C <sub>6</sub> H <sub>6</sub> N <sub>1</sub> O <sub>4</sub> <sup>+</sup>  | 4-nitrocatechol                                                                       | Night-time aged BBOA | 0.97                      |
| 170.05          | C <sub>7</sub> H <sub>8</sub> N <sub>1</sub> O <sub>4</sub> <sup>+</sup>  | 4-nitroguaiacol                                                                       |                      | 0.97                      |
| 186.04          | C <sub>7</sub> H <sub>8</sub> N <sub>1</sub> O <sub>5</sub> <sup>+</sup>  | unknown                                                                               |                      | 0.87                      |
| 184.02          | C <sub>7</sub> H <sub>6</sub> N <sub>1</sub> O <sub>5</sub> <sup>+</sup>  | fragments of C <sub>7</sub> H <sub>8</sub> N <sub>1</sub> O <sub>5</sub> <sup>+</sup> |                      | 0.85                      |
| 201.04          | C <sub>8</sub> H <sub>9</sub> O <sub>6</sub> <sup>+</sup>                 | unknown                                                                               |                      | 0.75                      |
| 198.05          | C <sub>9</sub> H <sub>10</sub> O <sub>5</sub> <sup>+</sup>                | syringic acid                                                                         |                      | 0.70                      |
| 283.26          | C <sub>18</sub> H <sub>35</sub> O <sub>2</sub> <sup>+</sup>               | oleic acid                                                                            | Cooking              | 0.90                      |
| 247.11          | C <sub>18</sub> H <sub>15</sub> O <sub>1</sub> <sup>+</sup>               | unknown                                                                               |                      | 0.88                      |
| 275.26          | C <sub>16</sub> H <sub>35</sub> O <sub>3</sub> <sup>+</sup>               | C <sub>16</sub> H <sub>33</sub> O <sub>2</sub> (H <sub>2</sub> O) <sup>+</sup>        |                      | 0.88                      |
| 285.28          | C <sub>18</sub> H <sub>37</sub> O <sub>2</sub> <sup>+</sup>               | stearic acid (fatty acid)                                                             |                      | 0.73                      |
| 257.25          | C <sub>16</sub> H <sub>33</sub> O <sub>2</sub> <sup>+</sup>               | corresponding to palmitic acid                                                        |                      | 0.54                      |
| 239.24          | C <sub>16</sub> H <sub>31</sub> O <sub>1</sub> <sup>+</sup>               | fragments of C <sub>16</sub> H <sub>33</sub> O <sub>2</sub> <sup>+</sup>              |                      | 0.54                      |
| 108.08          | C <sub>7</sub> H <sub>10</sub> N <sub>1</sub> <sup>+</sup>                | 3-ethyl-pyridine; 2,3-dimethyl-pyridine                                               | Aged combustion      | 0.94                      |
| 135.10          | C <sub>6</sub> H <sub>15</sub> O <sub>3</sub> <sup>+</sup>                | dimethyl carbitol                                                                     |                      | 0.93                      |
| 153.13          | C <sub>10</sub> H <sub>17</sub> O <sub>1</sub> <sup>+</sup>               | oxidized molecules of monoterpenes                                                    |                      | 0.86                      |
| 137.10          | C <sub>9</sub> H <sub>13</sub> O <sub>1</sub> <sup>+</sup>                | p-cumenol                                                                             |                      | 0.82                      |
| 166.09          | C <sub>9</sub> H <sub>12</sub> N <sub>1</sub> O <sub>2</sub> <sup>+</sup> | benzocaine                                                                            |                      | 0.80                      |
| 93.07           | C <sub>7</sub> H <sub>9</sub> <sup>+</sup>                                | toluene                                                                               |                      | 0.79                      |
| 105.02          | C <sub>3</sub> H <sub>5</sub> O <sub>4</sub> <sup>+</sup>                 | propanedioic acid                                                                     | Day-time aged BBOA   | 0.88                      |
| 131.03          | C <sub>5</sub> H <sub>7</sub> O <sub>4</sub> <sup>+</sup>                 | methylene butanedioic acid                                                            |                      | 0.87                      |
| 90.02           | C <sub>2</sub> H <sub>4</sub> N <sub>1</sub> O <sub>3</sub> <sup>+</sup>  | oxamic acid                                                                           |                      | 0.86                      |
| 132.03          | C <sub>4</sub> H <sub>6</sub> N <sub>1</sub> O <sub>4</sub> <sup>+</sup>  | iminoaspartic acid                                                                    |                      | 0.85                      |
| 129.06          | C <sub>6</sub> H <sub>9</sub> O <sub>3</sub> <sup>+</sup>                 | sotolone; 2,5-di-(hydroxymethyl)furan                                                 |                      | 0.84                      |
| 89.02           | C <sub>3</sub> H <sub>5</sub> O <sub>3</sub> <sup>+</sup>                 | butyric acid                                                                          |                      | 0.84                      |
| 101.02          | C <sub>4</sub> H <sub>5</sub> O <sub>3</sub> <sup>+</sup>                 | pentanedione                                                                          |                      | 0.84                      |
| 143.03          | C <sub>6</sub> H <sub>7</sub> O <sub>4</sub> <sup>+</sup>                 | hydroxy maltol                                                                        |                      | 0.84                      |
| 147.03          | C <sub>5</sub> H <sub>7</sub> O <sub>5</sub> <sup>+</sup>                 | 2-oxopentanedioic acid                                                                |                      | 0.83                      |
| 102.02          | C <sub>3</sub> H <sub>4</sub> N <sub>1</sub> O <sub>3</sub> <sup>+</sup>  | methyl isocyanatoformate                                                              |                      | 0.83                      |
| 116.03          | C <sub>4</sub> H <sub>6</sub> N <sub>1</sub> O <sub>3</sub> <sup>+</sup>  | 3-methyl-2,5-oxazolidine-dione                                                        |                      | 0.83                      |
| 159.03          | C <sub>6</sub> H <sub>7</sub> O <sub>5</sub> <sup>+</sup>                 | tricarballic anhydride                                                                |                      | 0.83                      |
| 129.02          | C <sub>5</sub> H <sub>5</sub> O <sub>4</sub> <sup>+</sup>                 | methanetetraldehyde                                                                   |                      | 0.83                      |
| 173.05          | C <sub>7</sub> H <sub>9</sub> O <sub>5</sub> <sup>+</sup>                 | oxidation products of guaiacol                                                        |                      | 0.83                      |
| 103.04          | C <sub>4</sub> H <sub>7</sub> O <sub>3</sub> <sup>+</sup>                 | propylene carbonate                                                                   |                      | 0.82                      |

|        |                                   |                                                   |                     |      |
|--------|-----------------------------------|---------------------------------------------------|---------------------|------|
| 161.04 | $C_6H_9O_5^+$                     | 2-oxoadipic acid                                  |                     | 0.82 |
| 285.28 | $C_{18}H_{37}O_2^+$               | stearic acid (fatty acid)                         |                     | 0.95 |
| 275.26 | $C_{16}H_{35}O_3^+$               | $C_{16}H_{33}O_2(H_2O)^+$                         |                     | 0.91 |
| 247.11 | $C_{18}H_{15}O_1^+$               | unknown                                           |                     | 0.90 |
| 259.11 | $C_{19}H_{15}O_1^+$               | unknown                                           |                     | 0.88 |
| 283.26 | $C_{18}H_{35}O_2^+$               | oleic acid; fragment of stearic acid (fatty acid) | Regional background | 0.88 |
| 107.07 | $C_4H_{11}O_3^+$                  | trimethoxy methane                                |                     | 0.82 |
|        | AMS-SO <sub>4</sub> <sup>2-</sup> | sulfate                                           |                     | 0.74 |
|        | AMS-NH <sub>4</sub> <sup>+</sup>  | Ammonium                                          |                     | 0.54 |

The selection of five OA factors was based on a combination of statistical diagnostics and physical interpretability. The  $Q/Q_{exp}$  value decreased progressively with increasing factor number; however, the reduction became marginal after five factors, indicating limited additional improvement in model performance. To evaluate solution stability, we examined solutions with one fewer and one additional factor. When fewer factors were used, at least one factor lacked clear correlations with characteristic compound markers and did not exhibit a physically interpretable composition, suggesting factor merging and insufficient separation of sources. In contrast, solutions with more factors resulted in two factors showing highly similar time series and mass spectral profiles, indicating factor splitting. Furthermore, correlations between factor time series and individual compounds were evaluated for all tested solutions. The five-factor solution showed consistent associations between factors and representative marker compounds, supporting meaningful source attribution. Based on these combined criteria, five factors were selected as the optimal interpretable solution.

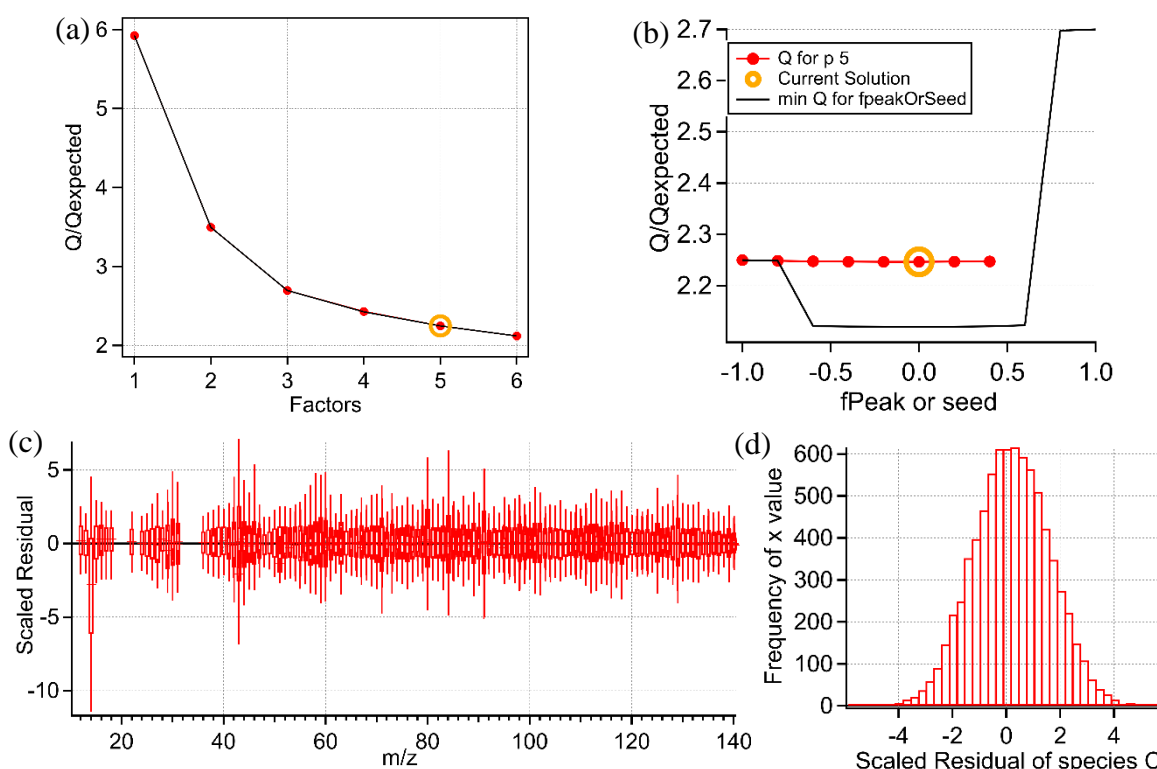

Figure S15 PMF diagnostic evaluation for the selected five-factor solution for summer OA measurements. (a)  $Q/Q_{exp}$  as a function of factor number, showing diminishing improvement beyond five factors. (b) Sensitivity of  $Q/Q_{exp}$  to the rotational parameter ( $f_{peak}$ ), indicating a stable solution with minimal dependence on rotation. (c) Scaled residuals ( $e_{ij}/\sigma_{ij}$ ) for all species, demonstrating the absence of systematic structure across  $m/z$  values. (d) Histogram of scaled residuals for a representative species, showing an approximately symmetric distribution centered near zero and supporting an adequate model fit and uncertainty representation.

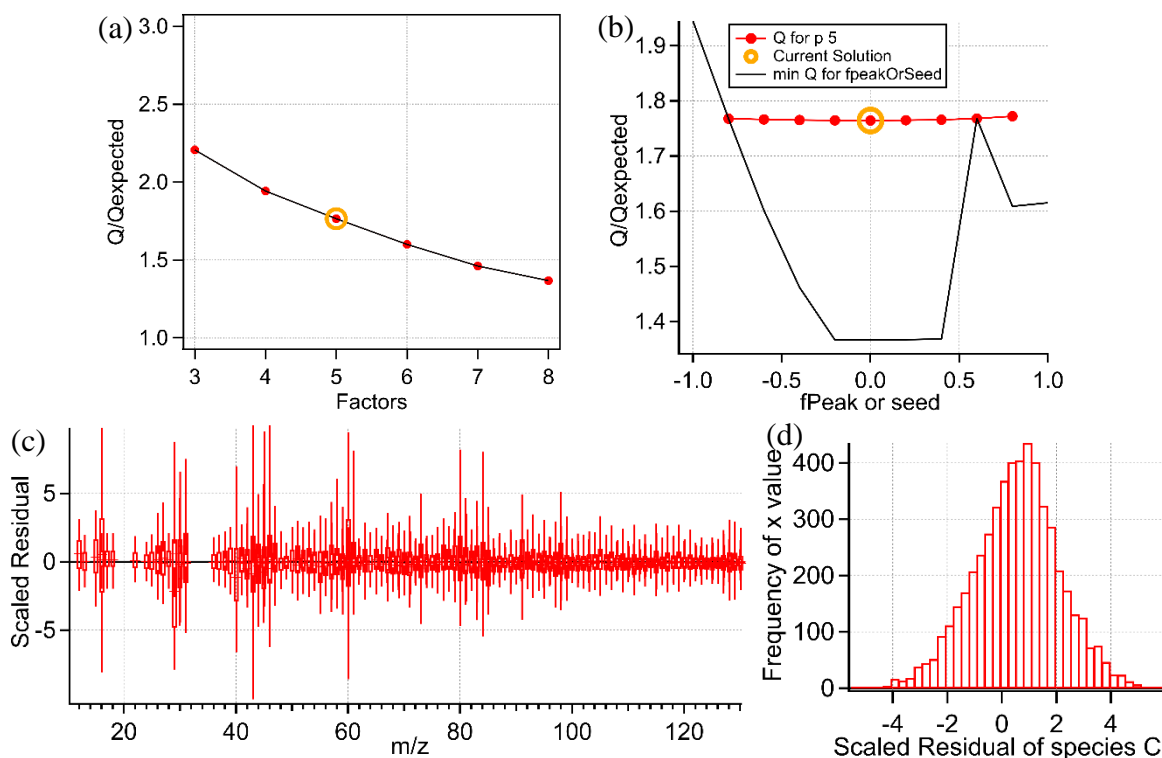

Figure S16. PMF diagnostic evaluation for the selected five-factor solution for March OA measurements. (a)  $Q/Q_{exp}$  as a function of factor number. (b) Sensitivity of  $Q/Q_{exp}$  to the rotational parameter ( $f_{peak}$ ). (c) Scaled residuals ( $e_{ij}/\sigma_{ij}$ ) for all species. (d) Histogram of scaled residuals for a representative species, showing a distribution centered near zero and indicating an adequate model fit.

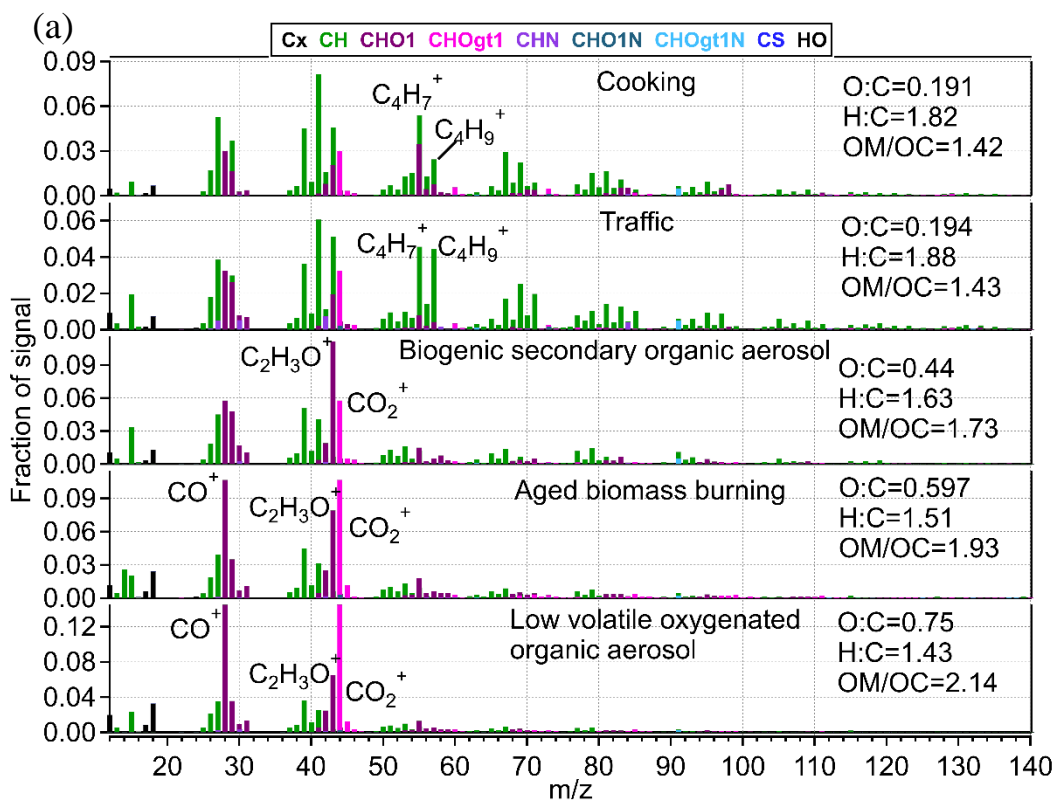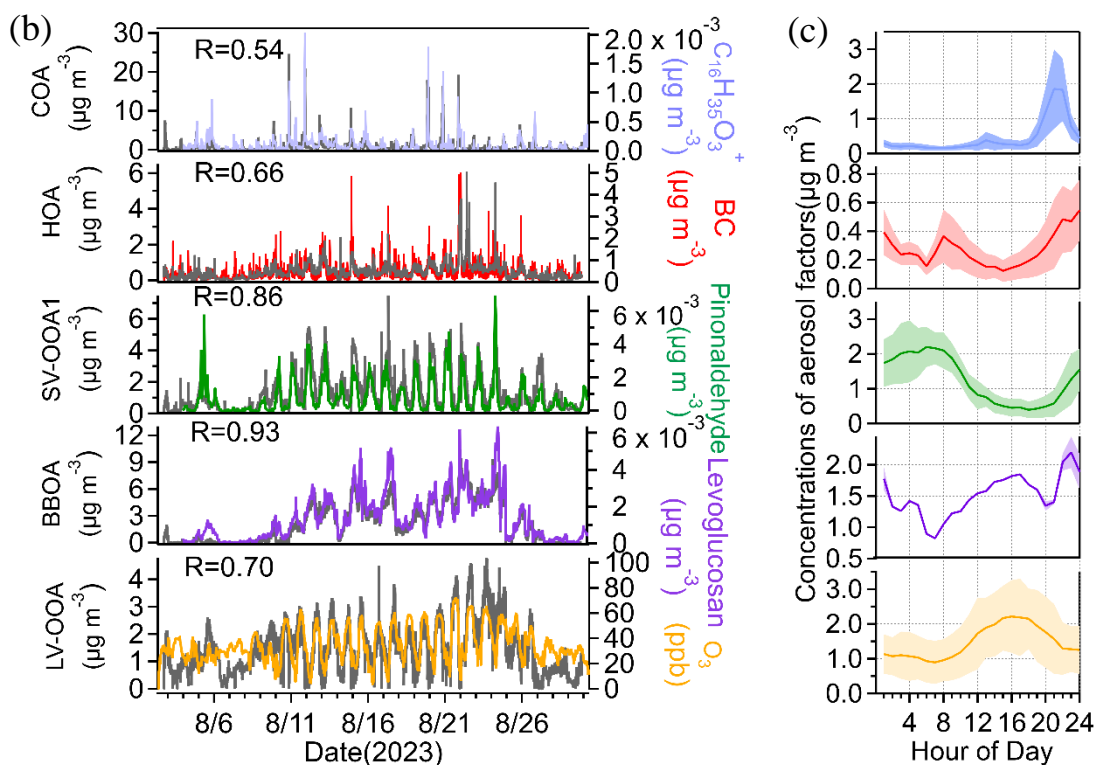

Figure S17 Source apportionment of OA in summer measured by the AMS. (a) Mass spectra of OA factors – cooking OA(COA), hydrocarbon-like OA (HOA), biogenic secondary OA(BOA), aged biomass burning aerosol (BBOA), and low-volatility oxygenated OA (LV-OOA). (b) Time series of OA factors and external tracer species (fatty acid, pinon aldehyde and levoglucosan measured by the PTR-MS, BC measured by the AE33, and O<sub>3</sub> measured by O<sub>3</sub>41M). (c) Median diurnal variations in OA factors.

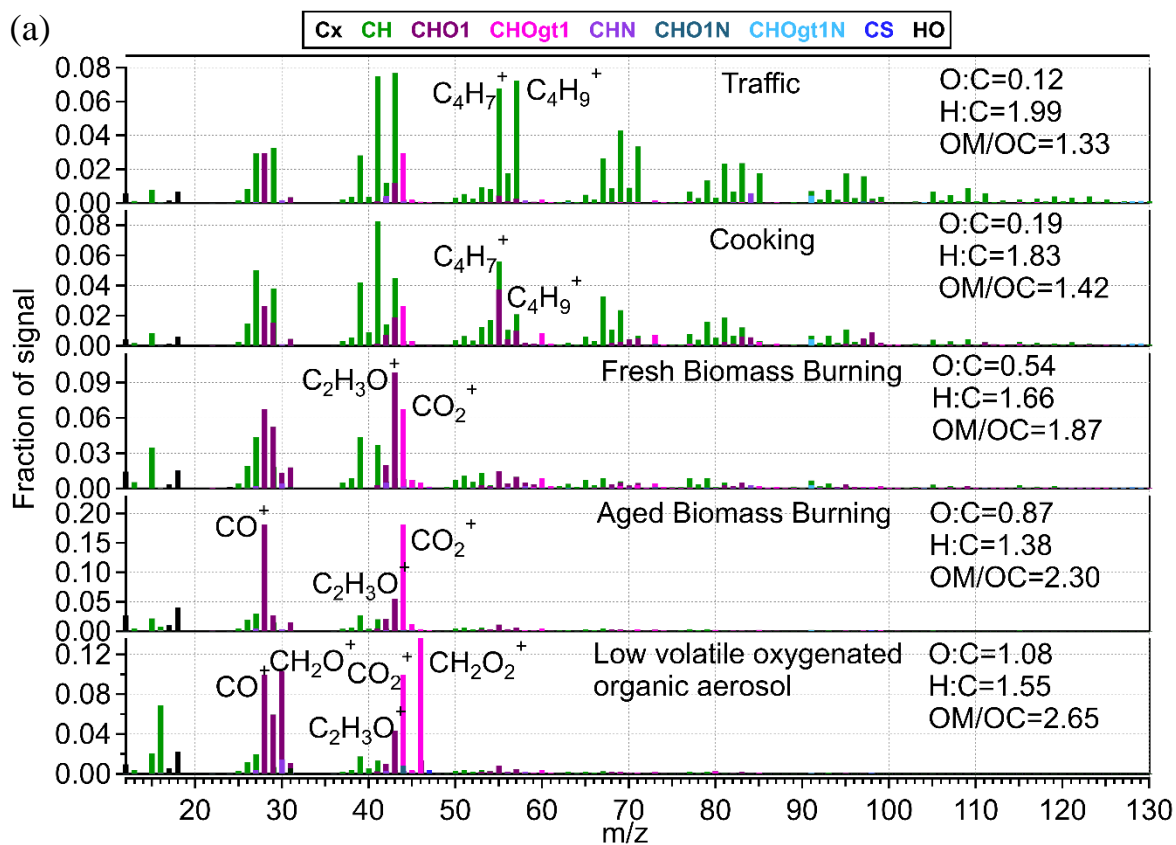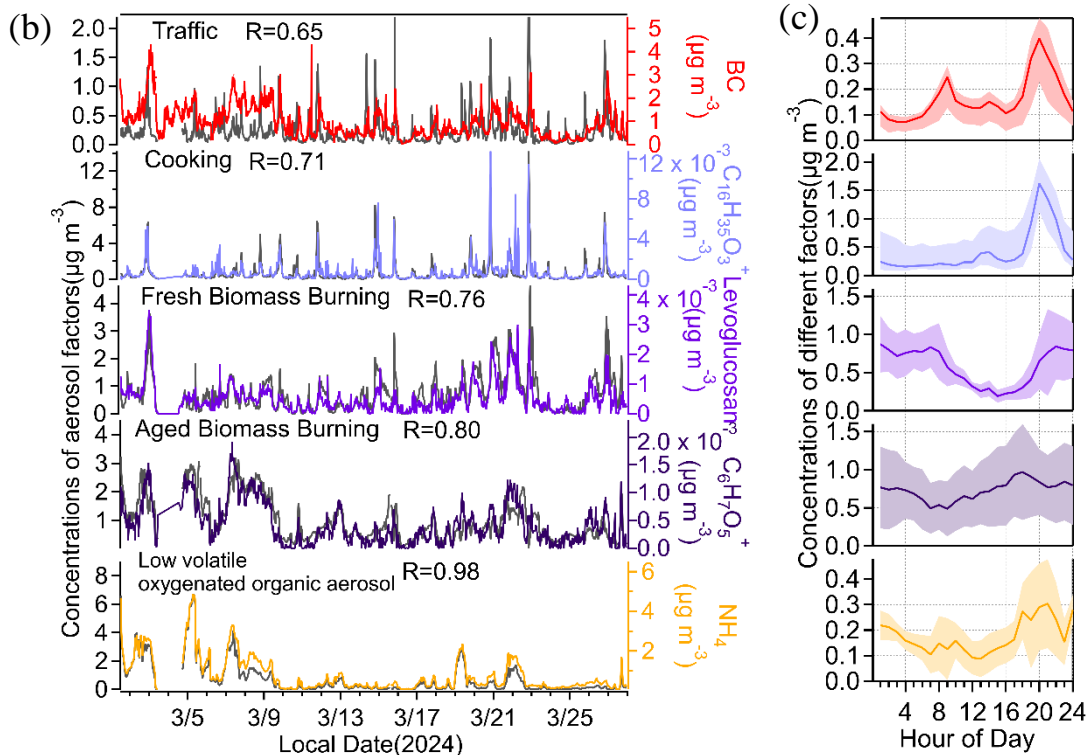

Figure S18 (a) Mass spectra of OA factors in winter– HOA, COA, fresh BBOA, aged BBOA, and LV-OOA. (b) Time series of OA factors and external tracer species (xylene, fatty acid, and  $C_6H_7O_5^+$  measured by the PTR-MS, ammonia aerosol measured by AMS. (c) Median diurnal variations in OA factors.

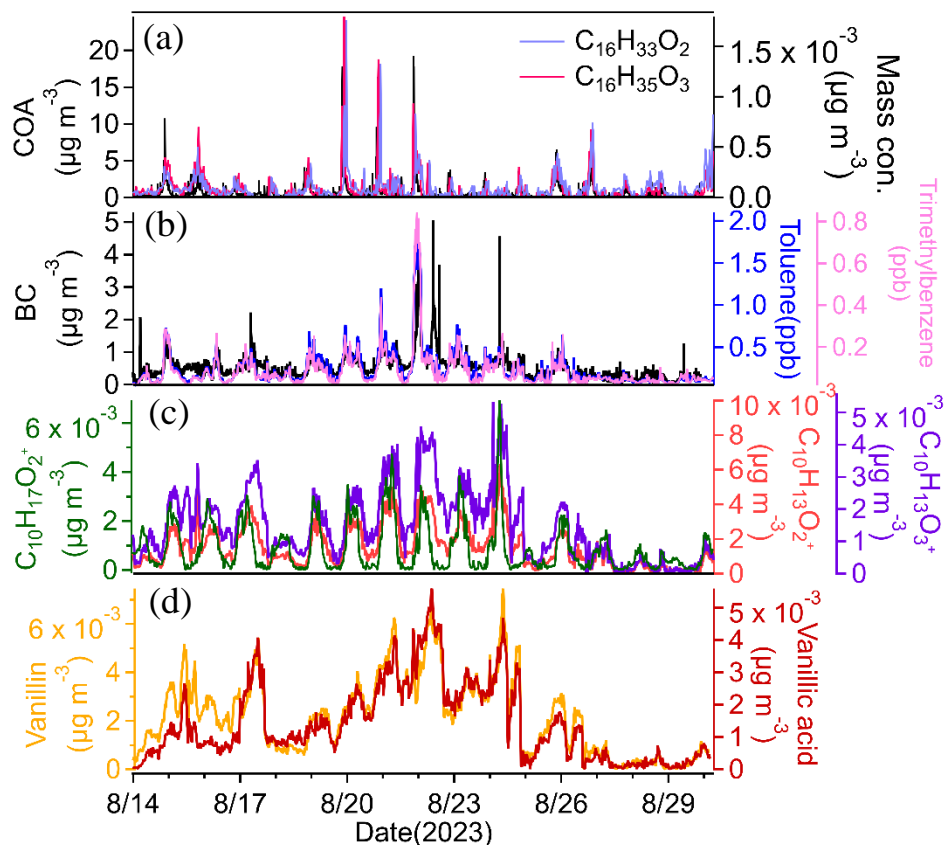

Figure S19 illustrates the time-series correlation of various tracers with the respective AMS factors: (a) COA tracers, including fatty acids ( $\text{C}_{16}\text{H}_{33}\text{O}_2^+$  and  $\text{C}_{16}\text{H}_{35}\text{O}_3^+$ ); (b) HOA tracers such as BC, toluene, and trimethylbenzene; (c) monoterpene oxidation products, including  $\text{C}_{10}\text{H}_{17}\text{O}_2^+$ ,  $\text{C}_{10}\text{H}_{13}\text{O}_2^+$ , and  $\text{C}_{10}\text{H}_{13}\text{O}_3^+$ ; and (d) BBOA tracers like vanillin and vanillic acid.

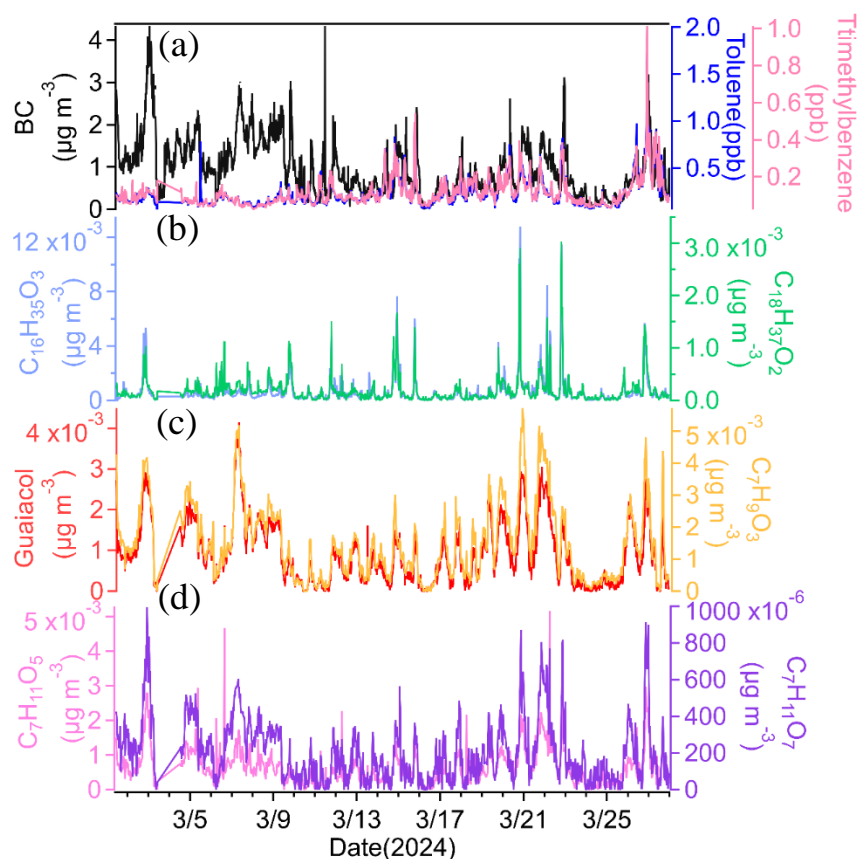

Figure S20 illustrates the time-series correlation of various tracers with the respective AMS factors: (a) HOA tracers such as BC, toluene, and trimethylbenzene; (b) COA tracers, including fatty acids ( $C_{18}H_{37}O_2^+$  and  $C_{16}H_{35}O_3^+$ ); (c) fresh BBOA tracers, including Guaiacol ( $C_7H_9O_2^+$ ),  $C_7H_9O_3^+$ ; and (d) aged BBOA compounds like  $C_7H_{11}O_5^+$  and  $C_7H_{11}O_7^+$ .

Table S10 The correlation between aged BBOA with black carbon, formaldehyde, barbecue tracers ( $C_{10}H_{13}O_3^+$ ,  $C_9H_{15}O_4^+$ ,  $C_9H_{11}O_4^+$ ), fresh biomass burning tracers ( $C_6H_{11}O_5^+$ ,  $C_9H_{11}O_5^+$ ,  $C_9H_7O_3^+$ ), and oxidized guaiacol products ( $C_6H_7O_5^+$ ,  $C_7H_9O_5^+$ )

|                                           | August | 22 <sup>nd</sup> -24 <sup>th</sup> August | March | 7-9 <sup>th</sup> March | Fresh BBOA in March | Fresh BBOA in 7-9 <sup>th</sup> March |
|-------------------------------------------|--------|-------------------------------------------|-------|-------------------------|---------------------|---------------------------------------|
| BC                                        | 0.75   | 0.64                                      | 0.39  | -0.13                   | 0.15                | -0.17                                 |
| Formaldehyde                              | 0.80   | -0.20                                     | 0.14  | 0.20                    | 0.38                | -0.35                                 |
| Coniferyl alcohol ( $C_{10}H_{13}O_3^+$ ) | 0.90   | 0.82                                      | 0.47  | 0.44                    | 0.69                | 0.65                                  |
| Pinic acid $C_9H_{15}O_4^+$               | 0.76   | 0.65                                      | 0.41  | 0.54                    | 0.68                | 0.42                                  |
| Homovanilic acid $C_9H_{11}O_4^+$         | 0.83   | 0.83                                      | 0.51  | 0.42                    | 0.67                | 0.56                                  |
| Levogluconan                              | 0.93   | 0.76                                      | 0.30  | 0.28                    | 0.72                | 0.62                                  |
| syringic acid ( $C_9H_{11}O_5^+$ )        | 0.84   | 0.81                                      | 0.24  | 0.06                    | 0.62                | 0.50                                  |
| $C_6H_7O_5^+$                             | 0.88   | 0.74                                      | 0.80  | 0.79                    | 0.36                | 0.25                                  |
| $C_7H_9O_5^+$                             | 0.87   | 0.86                                      | 0.74  | 0.70                    | 0.50                | 0.35                                  |

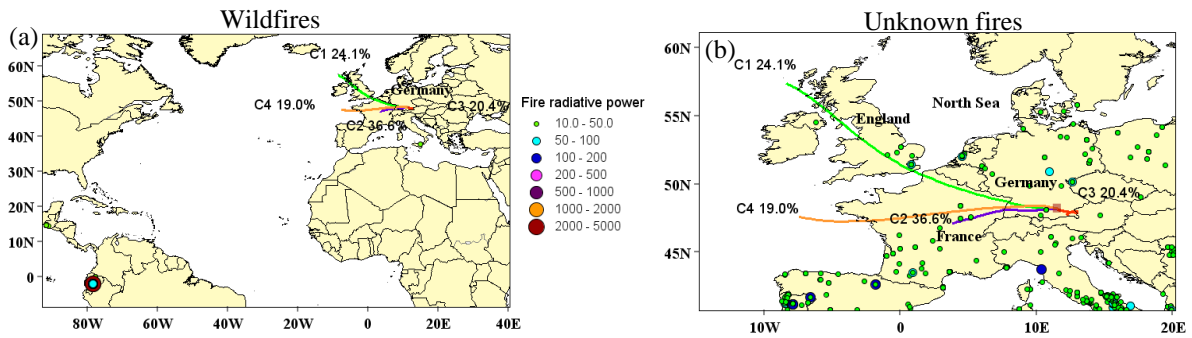

Figure S21. VIIRS satellite fire detections (<https://firms.modaps.eosdis.nasa.gov/map/#d:2024-03-03;@11.9,47.3,5.7z>) during August overlaid with clustered backward trajectories arriving in Munich. (a) All classified wildfires during August, colored by fire radiative power (FRP). (b) All unknown (unclassified) fire type during August, colored by FRP. The trajectory clusters (C1–C4; percentages indicate cluster frequency) illustrate the main transport pathways during the summer campaign and enable assessment of potential influence from fire activity along the air-mass histories.

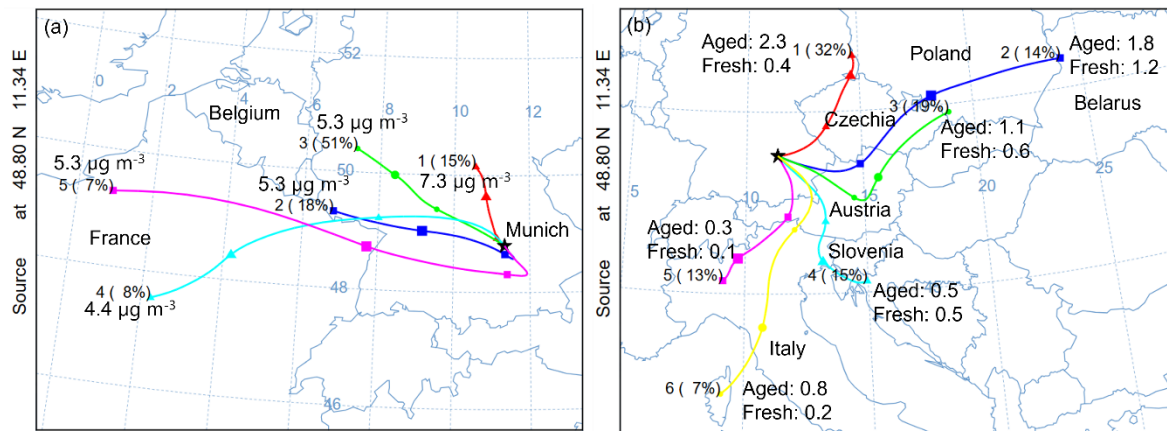

Figure S22: 72-hour back trajectories calculated at 500 m above ground level colored by (a) aged BBOA mass concentrations during the summer episode (22<sup>nd</sup> – 24<sup>th</sup> August 2023) and (b) fresh BBOA and aged BBOA mass concentrations during the winter episode (7<sup>th</sup> -9<sup>th</sup> March 2024)
